# Supplementary material for: Examining changes in the equity of physician distribution in Japan: a specialty-specific longitudinal study
Source: PubMed Central journal article supplement — BMJ Open. 2018 Jan 8;8(1):e018538. doi: 10.1136/bmjopen-2017-018538 (PMC5781009; doi:10.1136/bmjopen-2017-018538), 2018-01-08
Supplement: bmjopen-2017-018538.draft_revisions.pdf [file bmjopen-2017-018538.draft_revisions.pdf]

# BMJ Open

BMJ Open is committed to open peer review. As part of this commitment we make the peer review history of every article we publish publicly available.

When an article is published we post the peer reviewers' comments and the authors' responses online. We also post the versions of the paper that were used during peer review. These are the versions that the peer review comments apply to.

The versions of the paper that follow are the versions that were submitted during the peer review process. They are not the versions of record or the final published versions. They should not be cited or distributed as the published version of this manuscript.

BMJ Open is an open access journal and the full, final, typeset and author-corrected version of record of the manuscript is available on our site with no access controls, subscription charges or pay-per-view fees (<http://bmjopen.bmj.com>).

If you have any questions on BMJ Open's open peer review process please email [editorial.bmjopen@bmj.com](mailto:editorial.bmjopen@bmj.com)

# BMJ Open

## Failure to improve the inequitable geographic distribution of physicians in Japan: a specialty-specific longitudinal study

|                                 |                                                                                                                                                                                                                                                                                                                                                                                         |
|---------------------------------|-----------------------------------------------------------------------------------------------------------------------------------------------------------------------------------------------------------------------------------------------------------------------------------------------------------------------------------------------------------------------------------------|
| Journal:                        | <i>BMJ Open</i>                                                                                                                                                                                                                                                                                                                                                                         |
| Manuscript ID                   | bmjopen-2017-018538                                                                                                                                                                                                                                                                                                                                                                     |
| Article Type:                   | Research                                                                                                                                                                                                                                                                                                                                                                                |
| Date Submitted by the Author:   | 05-Jul-2017                                                                                                                                                                                                                                                                                                                                                                             |
| Complete List of Authors:       | Hara, Koji; Kyoto University, Department of Healthcare Economics and Quality Management<br>Kunisawa, Susumu; Kyoto University, Department of Healthcare Economics and Quality Management<br>Sasaki, Noriko; Kyoto University, Department of Healthcare Economics and Quality Management<br>Imanaka, Yuichi; Kyoto University, Department of Healthcare Economics and Quality Management |
| <b>Primary Subject Heading</b>: | Health policy                                                                                                                                                                                                                                                                                                                                                                           |
| Secondary Subject Heading:      | Public health                                                                                                                                                                                                                                                                                                                                                                           |
| Keywords:                       | Inequity, Aging, Physician, Japan                                                                                                                                                                                                                                                                                                                                                       |
|                                 |                                                                                                                                                                                                                                                                                                                                                                                         |

SCHOLARONE™  
Manuscripts

Peer Review Only

1 Failure to improve the inequitable geographic distribution of  
2 physicians in Japan: a specialty-specific longitudinal study

3  
4 **Authors:**

5 Koji Hara MA, Susumu Kunisawa, PhD, Noriko Sasaki, PhD, and Yuichi  
6 Imanaka, PhD

7 Department of Healthcare Economics and Quality Management, Graduate  
8 School of Medicine, Kyoto University; Yoshida Konoe-cho, Sakyo-ku, Kyoto  
9 City, Kyoto, Japan 606-8501

10  
11 **Corresponding author:**

12 Yuichi Imanaka, Professor

13 Mailing address: Department of Healthcare Economics and Quality

14 Management, Graduate School of Medicine, Kyoto University; Yoshida

15 Konoe-cho, Sakyo-ku, Kyoto City, Kyoto, Japan 606-8501

16 Tel: +81 75 753 4454

17 Fax: +81 75 753 4455

18 Email: imanaka-y@umin.net

1  
2  
3  
4  
5  
6  
7  
8  
9  
10  
11  
12  
13  
14  
15  
16  
17  
18  
19  
20  
21  
22  
23  
24  
25  
26  
27  
28  
29  
30  
31  
32  
33  
34  
35  
36  
37  
38  
39  
40  
41  
42  
43  
44  
45  
46  
47  
48  
49  
50  
51  
52  
53  
54  
55  
56  
57  
58  
59  
60

19  
20  
21  
22

**Word count:**

3 414 words

For peer review only

1  
2  
3  
4  
5  
6 23 Failure to improve the inequitable geographic distribution of  
7  
8  
9 24 physicians in Japan: a specialty-specific longitudinal study  
10  
11  
12 25

13  
14  
15 26 **Abstract**

16  
17 27 **Objectives**

18  
19  
20 28 In this longitudinal study, we examine changes in the geographic distribution of physicians by  
21  
22  
23 29 clinical specialty in Japan with adjustments for healthcare demand based on population structure.  
24  
25

26 30 **Methods**

27  
28  
29 31 The Japanese population was adjusted for healthcare demand using health expenditure per capita  
30  
31  
32 32 stratified by age and sex. The numbers of physicians per 100 000 demand-adjusted population in  
33  
34  
35 33 2000 and 2014 were calculated for sub-prefectural regions known as secondary medical areas.  
36

37 34 Disparities in the geographic distribution of physicians for each specialty were assessed using the  
38  
39  
40 35 Gini coefficient. A subgroup analysis was conducted by dividing the regions into four groups  
41  
42  
43 36 according to urban-rural classification and initial physician supply.  
44  
45

46 37 **Results**

47  
48  
49 38 Over the study period, the number of physicians per 100 000 demand-adjusted population decreased  
50  
51  
52 39 in all clinical specialties (e.g., surgery: 26·0% decrease) excluding pediatrics (33·3% increase) and  
53  
54  
55 40 anesthesiology (21·1% increase). No improvements in geographic disparity were observed in any of  
56  
57  
58  
59  
60

1  
2  
3  
4  
5  
6 41 the clinical specialties. In particular, geographic disparity worsened in internal medicine, surgery,  
7  
8  
9 42 and obstetrics and gynecology. Rural areas with lower initial physician supply had the lowest  
10  
11 43 increase (or highest decrease) in physicians per 100 000 demand-adjusted population in all clinical  
12  
13  
14 44 specialties except pediatrics and anesthesiology. In contrast, urban areas with lower initial physician  
15  
16  
17 45 supply had the highest increase (or lowest decrease) in all clinical specialties.

18  
19  
20 46 **Conclusion**

21  
22 47 The geographic distribution of physicians has failed to improve in any of the clinical specialties.  
23  
24  
25 48 There is also a growing disparity in physician supply between the urban and rural regions. Urgent  
26  
27  
28 49 measures are needed to reduce the geographic disparities in physician supply and regulate the  
29  
30  
31 50 uneven distribution among clinical specialties.

32  
33 51  
34  
35  
36  
37  
38  
39  
40  
41  
42  
43  
44  
45  
46  
47  
48  
49  
50  
51  
52  
53  
54  
55  
56  
57  
58  
59  
60

1  
2  
3  
4  
5  
6 **52 Article Summary**

7  
8  
9 **53 Strengths and limitations of this study**

10  
11 ● This study aimed to longitudinally examine changes in the geographic distribution of physicians  
12  
13  
14 by clinical specialty in Japan with adjustments for healthcare demand according to population  
15  
16  
17 structure.  
18

19  
20 ● The adjustment method used in this study had been previously verified, and enables adjustment  
21  
22  
23 for healthcare demand according to the age strata using health expenditure per capita.  
24

25 ● This study included not only the age strata but also sex in the calculation of the adjustment  
26  
27  
28 coefficients in order to increase the accuracy of adjustments.  
29

30  
31 ● There was a lack of information on the physicians' working conditions, such as  
32  
33  
34 whether a physician worked full-time or part-time.  
35

36  
37 ● It may be difficult to generalize our adjustment coefficients to other countries as they were  
38  
39  
40 calculated using Japanese health expenditure, but the adjustment method itself may have  
41  
42  
43 applications in other countries.  
44

45  
46  
47  
48  
49  
50  
51  
52  
53  
54  
55  
56  
57  
58  
59  
60

## 69 **Introduction**

70 The presence of inequities in the geographic distribution of physicians is a major social problem in  
71 many countries.<sup>1-4</sup> In Japan, the geographic disparity in physician supply has long been recognized  
72 as a serious flaw in the healthcare provision system.<sup>5 6</sup> The lack of regulations that dictate where  
73 individual physicians work in Japan has led to the concentration of physicians in urban regions and a  
74 shortfall in rural areas, thereby resulting in uneven access to health care throughout the country.<sup>5 6</sup>  
75 On the other hand, Japan has entered a period of population decline,<sup>7</sup> and an oversupply of  
76 physicians is imminent if their numbers continue to increase at current levels. Attempts to control the  
77 total number of physicians have been met with resistance from various interest groups.<sup>8</sup>

78 In addition to the geographic disparity in physician supply, an uneven distribution of  
79 physicians among the clinical specialties has also been reported in Japan.<sup>9</sup> Previous studies from the  
80 US have also shown that geographic distribution patterns vary according to clinical specialty.<sup>10 11</sup> In  
81 Japan, geographic disparities in the number of physicians in pediatrics, obstetrics and gynecology  
82 (OB/GYN), and anesthesiology have been documented.<sup>12</sup> However, few studies have longitudinally  
83 examined the geographic distribution of physicians according to clinical specialty.

84 Although the number of physicians per 100 000 population is generally used as an  
85 indicator when examining geographic disparities in physician supply, this measure involves a simple  
86 head count that does not account for the inherent variations in healthcare demand among the



1  
2  
3  
4  
5  
6 87 different age strata and sex.<sup>4</sup> Furthermore, Japan's population is aging at an unprecedented rate and  
7  
8  
9 88 has transformed into the world's first "super-aged" society (where more than 21% of a country's  
10  
11  
12 89 population is aged 65 years and older). As a consequence, the population structure in Japan is  
13  
14  
15 90 undergoing dramatic changes, which has invariably resulted in changes to healthcare demand. We  
16  
17  
18 91 have previously reported that Japan's healthcare demand increased by 22% from 2000 to 2014 amid  
19  
20  
21 92 worsening geographic disparity in physician supply.<sup>13</sup> However, studies have yet to be conducted on  
22  
23  
24 93 the disparity in Japan's physician supply according to the different clinical specialties while  
25  
26  
27 94 accounting for the differences in healthcare demand.

28  
29 95 This study aimed to longitudinally examine changes in the geographic distribution of  
30  
31  
32 96 physicians by clinical specialty in Japan with adjustments for healthcare demand according to  
33  
34  
35 97 population structure.

## 36 37 38 39 99 **Methods**

### 40 41 42 100 Data source

43  
44  
45 101 Data on the number of physicians were obtained from Surveys of Physicians, Dentists, and  
46  
47  
48 102 Pharmacists conducted every two years by the Ministry of Health, Labour and Welfare (MHLW).  
49  
50  
51 103 Population data (age, sex, and location of residence) were extracted from the Annual Report of the  
52  
53  
54 104 National Basic Resident Registration System published by the Ministry of Internal Affairs and

1  
2  
3  
4  
5  
6 105 Communications, and the number of births were obtained from the Annual Report of Vital Statistics  
7  
8  
9 106 published by the MHLW. We also acquired data on national health expenditure per capita according  
10  
11 107 to patient age in 2013 from the MHLW. The total area of habitable land was ascertained from  
12  
13  
14 108 statistical reports on land areas of prefectures and municipalities by the Geospatial Information  
15  
16  
17 109 Authority of Japan.  
18  
19

20 110

21  
22  
23 111 Physicians and population

24  
25 112 We targeted physicians working in medical facilities (hospitals and clinics), and excluded physicians  
26  
27  
28 113 working in non-clinical facilities (e.g., research centers and government offices). The following  
29  
30  
31 114 clinical specialties were included in analysis: internal medicine, surgery, orthopedics, OB/GYN,  
32  
33  
34 115 pediatrics, and anesthesiology.  
35

36  
37 116 In addition to the total population, we also analyzed population subgroups including the  
38  
39  
40 117 female population, pediatric population (<15 years of age), and the number of births. With the  
41  
42  
43 118 exception of the number of births, all study populations were adjusted for healthcare demand. We  
44  
45  
46 119 calculated the number of OB/GYN specialists per 100 000 female population and per 100 000 births,  
47  
48  
49 120 the number of pediatricians per 100 000 pediatric population, and the number of physicians per 100  
50  
51 121 000 population for each of the other clinical specialties.  
52

53  
54 122

1  
2  
3  
4  
5  
6 123 Geographic unit  
7

8  
9 124 The geographic unit of analysis was the secondary medical area (SMA). There are three regional  
10  
11 125 levels of healthcare provision designated in Japan. Primary medical areas are geographic units where  
12  
13  
14 126 primary care is provided, and are demarcated by municipal borders. Tertiary medical areas are  
15  
16  
17 127 geographic units that provide advanced medical care, and are demarcated by prefectural borders.  
18  
19  
20 128 SMAs are set between primary and tertiary medical areas, and are regions where general medical  
21  
22  
23 129 care (such as inpatient care) is provided; these areas are composed of multiple municipalities. Each  
24  
25  
26 130 prefectural government stipulates the geographic and demographic range of the SMAs within their  
27  
28  
29 131 prefecture. As a result, the boundaries of each SMA can be altered in response to changes in  
30  
31  
32 132 healthcare demand. SMAs have been previously used to examine the inequity in physician supply in  
33  
34 133 Japan.<sup>6 14</sup> Because the number of SMAs varies slightly over time, our analyses were conducted using  
35  
36  
37 134 the 349 SMAs designated in 2012.  
38

39  
40 135

41  
42 136 Analytical methods  
43

44  
45 137 This retrospective study longitudinally examined the changes in the geographic distribution of the  
46  
47  
48 138 number of physicians by clinical specialty among Japan's SMAs from 2000 to 2014. The population  
49  
50  
51 139 was first adjusted using adjustment coefficients of healthcare demand, which were calculated based  
52  
53  
54 140 on the health expenditure per capita stratified by age and sex through a previously described  
55  
56

1  
2  
3  
4  
5  
6 141 method.<sup>13</sup> Health expenditure per capita is indicative of the general workload of healthcare  
7  
8 142 providers.<sup>15</sup> These expenditures include those for both inpatient and outpatient services, and account  
9  
10  
11 143 for variations in patient health status.<sup>13</sup> The demand-adjusted population was generated by  
12  
13  
14 144 multiplying the raw population with the adjustment coefficients.

15  
16  
17 145 Next, geographic disparity was assessed using the Gini coefficient, which is an indicator  
18  
19  
20 146 widely used to examine disparity in the field of economics and has also been applied to analyze  
21  
22  
23 147 geographic disparity in physician supply.<sup>15 16-18</sup> The coefficients, which take a value from 0  
24  
25  
26 148 (indicating complete equality) to 1 (indicating complete inequality), measure departure from a  
27  
28  
29 149 uniform distribution by drawing Lorenz curves.<sup>17</sup> If the curves of two time points intersect,  
30  
31  
32 150 conclusions cannot be made as to whether or not the inequity of distribution is increasing.<sup>18</sup> Thus, we  
33  
34  
35 151 plotted two Lorenz curves (one each for 2000 and 2014) for each clinical specialty.

36  
37 152 Finally, a subgroup analysis was conducted by dividing SMAs into groups according to  
38  
39  
40 153 two regional characteristics. Using the method described in Sasaki et al.,<sup>19</sup> we classified each SMA  
41  
42  
43 154 into one of four groups based on whether the SMA was an urban or rural area, and whether the SMA  
44  
45  
46 155 had a higher or lower initial physician supply in 2000. An SMA was designated an urban area (or a  
47  
48  
49 156 rural area) if its population density was higher (or lower) than the median value in all SMAs. The  
50  
51  
52 157 population density of each SMA was calculated using the total area of habitable land and the  
53  
54  
55 158 population in 2000. Next, an SMA was designated as having a higher (or lower) initial physician

1  
2  
3  
4  
5  
6 159 supply if the number of physicians per 100 000 population was higher (or lower) than the median  
7  
8  
9 160 number of physicians per 100 000 population in all SMAs. The following four groups were  
10  
11 161 analyzed: Group 1, comprising urban areas with higher initial physician supply; Group 2, comprising  
12  
13  
14 162 rural areas with higher initial physician supply; Group 3, comprising rural areas with lower initial  
15  
16  
17 163 physician supply; and Group 4, comprising urban areas with lower initial physician supply. Data  
18  
19  
20 164 from 2000 were used for both the population and physicians. In this subanalysis, we compared the  
21  
22  
23 165 inter-group changes in the number of physicians per 100 000 population between 2000 and 2014.

24  
25 166 All analyses were performed using R statistical software (V.3.2.2).

26  
27  
28 167

## 30 31 168 **Results**

32  
33  
34 169 Figure 1 shows the adjustment coefficients of healthcare demand for the different age strata and sex.  
35  
36  
37 170 These coefficients varied widely among the different categories. In male residents, healthcare  
38  
39  
40 171 demand was lowest (0·2) in those aged in their early twenties and highest (3·83) in those aged 80  
41  
42  
43 172 years and older; this was more than a 19-fold difference between the two groups. In female residents,  
44  
45  
46 173 healthcare demand was lowest (0·2) in those aged in their late teens and highest (3·23) in those aged  
47  
48  
49 174 80 years and older; this was more than a 16-fold difference between the two groups. The adjustment  
50  
51  
52 175 coefficients were applied to the raw population to produce the demand-adjusted population.

53  
54 176 Table 1 shows the population sizes of the total population, female population, and pediatric

1  
2  
3  
4  
5  
6 177 population before and after applying the adjustment coefficients in 2000 and 2014. Before  
7  
8  
9 178 adjustment, the population did not substantially change throughout the study period. In contrast, the  
10  
11 179 demand-adjusted total population increased by 23·7% between 2000 and 2014. The number of births,  
12  
13  
14 180 which was not adjusted for healthcare demand, decreased by 15·7%. The pediatric population  
15  
16  
17 181 declined by 11·1% over the study period before and after adjusting for healthcare demand.  
18  
19

20 182 Table 2 shows the overall numbers of physicians and the numbers of physicians per 100  
21  
22 183 000 population in 2000 and 2014. The overall number of all physicians increased by 22·1% over the  
23  
24  
25 184 study period. Similarly, the number of all physicians per 100 000 population increased by 21·7%.  
26  
27  
28 185 However, the number of all physicians per 100 000 demand-adjusted population decreased by 1·3%.  
29  
30  
31 186 Furthermore, the overall numbers of internists, orthopedists and OB/GYN specialists also increased,  
32  
33  
34 187 but the numbers of these specialists per 100 000 demand-adjusted population declined. The number  
35  
36  
37 188 of OB/GYN specialists per 100 000 births increased by 23·1%. The overall number of surgeons  
38  
39  
40 189 decreased by 8·7%, and the number of surgeons per 100 000 demand-adjusted population decreased  
41  
42  
43 190 by 26·6%. The overall number of anesthesiologists showed a large increase of 50·0%, and the  
44  
45  
46 191 number of anesthesiologists per 100 000 demand-adjusted population increased by 21·1%. The  
47  
48  
49 192 overall number of pediatricians increased by 18·4%, and the number of pediatricians per 100 000  
50  
51 193 demand-adjusted pediatric population increased by 33·3%.  
52

53 194 Table 3 shows the trends in Gini coefficients for the number of physicians per 100 000  
54  
55  
56  
57  
58  
59  
60

1  
2  
3  
4  
5  
6 195 population in the SMAs by clinical specialty. There were no substantial changes in the Gini  
7  
8  
9 196 coefficients for the numbers of orthopedists, pediatricians, and anesthesiologists per 100 000  
10  
11 197 demand-adjusted population. However, inequity had worsened in the geographic distribution of  
12  
13  
14 198 internists, surgeons, and OB/GYN specialists (for both the female population and the number of  
15  
16  
17 199 births). In these three specialties, the Lorenz curves in 2014 also demonstrated a tendency to  
18  
19  
20 200 deteriorate more than the curves in 2000 without intersection between the two curves (figures not  
21  
22  
23 201 shown). When comparing the Gini coefficients before and after adjusting for healthcare demand, the  
24  
25  
26 202 trends in the coefficients were similar for each clinical specialty. However, the post-adjustment Gini  
27  
28  
29 203 coefficients of all clinical specialties (except for pediatrics) were higher than their pre-adjustment  
30  
31 204 values.

32  
33  
34 205 Table 4 summarizes the numbers of physicians per 100 000 population in the four groups  
35  
36  
37 206 of SMAs in the subanalysis. Detailed descriptive statistics of the four groups are provided in the  
38  
39  
40 207 Appendix. Figure 2 shows the temporal increases (2000 to 2014) in the number of physicians by  
41  
42  
43 208 clinical specialty in each group. The temporal increases in the number of internists and orthopedists  
44  
45  
46 209 were similar to those for all physicians. The overall number of surgeons decreased in all groups  
47  
48  
49 210 except for Group 4, and the number of surgeons per 100 000 demand-adjusted population decreased  
50  
51 211 by 20% to 30% in all groups. As shown in Table 4, the number of surgeons per 100 000  
52  
53  
54 212 demand-adjusted population in Group 3 (11·9) was approximately half of the number in Group 1

1  
2  
3  
4  
5  
6 213 (23·2) in 2014. In all groups, the number of OB/GYN specialists per 100 000 demand-adjusted  
7  
8  
9 214 female population decreased, but the number of OB/GYN specialists per 100 000 births increased.  
10  
11 215 The number of pediatricians per 100 000 demand-adjusted pediatric population increased more in  
12  
13  
14 216 the rural SMAs than in the urban SMAs. The number of anesthesiologists per 100 000  
15  
16  
17 217 demand-adjusted population increased in all groups; in particular, the number in Group 4 increased  
18  
19  
20 218 by more than twice that of the other groups. In all clinical specialties except pediatrics, Group 3 had  
21  
22  
23 219 the lowest increase (or the highest decrease) in the number of physicians per 100 000  
24  
25  
26 220 demand-adjusted population. The 2014-2000 difference and ratio of the number of physicians per  
27  
28  
29 221 100 000 demand-adjusted population between Groups 3 and 4 increased in all clinical specialties  
30  
31 222 except pediatrics.

32  
33  
34 223

## 35 36 37 224 **Discussion**

38  
39 225 The four major findings of this study are as follows: First, the demand-adjusted total population had  
40  
41  
42 226 increased by 23·7% between 2000 and 2014, whereas the demand-adjusted pediatric population had  
43  
44  
45 227 decreased by 11·1%. Second, the number of physicians per 100 000 demand-adjusted population  
46  
47  
48 228 decreased in all clinical specialties except pediatrics and anesthesiology. The largest increase  
49  
50  
51 229 (33·3%) was observed in pediatrics. Third, the geographic disparity in the number of physicians per  
52  
53  
54 230 100 000 demand-adjusted population had not improved in all clinical specialties, and had in fact



1  
2  
3  
4  
5  
6 231 deteriorated in internal medicine, surgery, and OB/GYN. Fourth, the rural areas with lower initial  
7  
8  
9 232 physician supply had the lowest increase (or highest decrease) in the number of physicians per 100  
10  
11 233 000 demand-adjusted population compared with other areas in all clinical specialties except  
12  
13  
14 234 pediatrics and anesthesiology. In contrast, the urban areas with lower initial physician supply had the  
15  
16  
17 235 highest increase (or lowest decrease) in all clinical specialties.

18  
19  
20 236 The population used in this study was adjusted for healthcare demand among the different  
21  
22  
23 237 age strata and sex using a previously described method.<sup>13</sup> As seen in Figure 1, there were  
24  
25  
26 238 considerable variations in healthcare demand among the different age strata and sex. Although  
27  
28  
29 239 several papers have examined the demand-adjusted geographic disparity in physician supply,<sup>15 20</sup>  
30  
31 240 there is currently no gold standard for the adjustment method.<sup>20</sup> The method used in this study had  
32  
33  
34 241 been previously verified,<sup>13</sup> and enables adjustment for healthcare demand according to the age strata.  
35  
36  
37 242 In addition, the inclusion of sex in the calculation of the coefficients may increase the accuracy of  
38  
39  
40 243 adjustments.

41  
42 244 The number of physicians per 100 000 demand-adjusted population had decreased in  
43  
44  
45 245 internal medicine, surgery, orthopedics, and OB/GYN (per female population). The decline in  
46  
47  
48 246 physician supply was especially notable in surgery and OB/GYN, which corroborates previously  
49  
50  
51 247 reported downward trends in the numbers of physicians in these specialties.<sup>12</sup> The distribution  
52  
53  
54 248 among these specialties is affected by physician preference, experience, and environment. For

1  
2  
3  
4  
5  
6 249 example, the shortage of surgeons may be influenced by the long working hours, high risk of  
7  
8 250 medical litigation, and low reward for surgical skill.<sup>21</sup> Previous research has also shown that an  
9  
10  
11 251 increase in female physicians has changed the distribution of specialties because they are more likely  
12  
13  
14 252 to choose OB/GYN and pediatrics instead of surgery.<sup>22,23</sup> In order to retain a high number of both  
15  
16  
17 253 female and male physicians, improvements must be made to the working environment, such as a  
18  
19  
20 254 reduction of physician working hours by assigning more duties and responsibilities to other  
21  
22  
23 255 non-physician health professionals.<sup>21</sup>

24  
25 256 Our findings detected a decrease in the numbers of internists and orthopedists despite an  
26  
27  
28 257 increase in healthcare demand. On the other hand, the number of pediatricians per 100 000  
29  
30  
31 258 demand-adjusted pediatric population and OB/GYN specialists per 100 000 births had greatly  
32  
33  
34 259 increased due to a decrease in the pediatrics population and the number of births. The rate of  
35  
36  
37 260 pediatric population decline is expected to eventually exceed the rate of total population decline.<sup>24</sup> It  
38  
39  
40 261 may therefore be more useful to properly allocate physicians instead of simply increasing their  
41  
42  
43 262 overall numbers.

44  
45 263 Based on the temporal trends in Gini coefficients, there were no improvements to the  
46  
47  
48 264 geographic disparity in the number of physicians per 100 000 demand-adjusted population in all  
49  
50  
51 265 clinical specialties between 2000 and 2014. In particular, the inequity in physician supply had  
52  
53  
54 266 worsened in internal medicine, surgery, and OB/GYN. The inequity in surgery and OB/GYN may

1  
2  
3  
4  
5  
6 267 have been influenced by the decrease or lack of increase in the overall number of physicians in these  
7  
8  
9 268 specialties. These findings suggest that the uneven distribution of physicians among the clinical  
10  
11 269 specialties may exacerbate geographic disparities in physician supply. On the other hand, the number  
12  
13  
14 270 of internists had increased at a rate that was comparable to the overall growth rate. The deterioration  
15  
16  
17 271 in geographic disparity may therefore be related to an increasing tendency toward physician  
18  
19  
20 272 specialization in Japan.<sup>25</sup> In fact, although the overall number of general internists had decreased  
21  
22  
23 273 from 74 539 to 61 317 over the study period, there was actually an increase from 21 006 to 48 780  
24  
25  
26 274 physicians in internal subspecialties such as pulmonary, cardiovascular, and gastrointestinal  
27  
28  
29 275 medicine (data not shown). The geographic disparity in physician supply in these subspecialties is  
30  
31 276 greater than the disparity in general internists.<sup>9</sup>

32  
33  
34 277 The rate of increase in the number of physicians per 100 000 demand-adjusted population  
35  
36  
37 278 in the urban areas was generally higher (or the rate of decrease was lower) than in the rural areas. In  
38  
39  
40 279 all clinical specialties except pediatrics, both the difference and ratio in the number of physicians per  
41  
42  
43 280 100 000 demand-adjusted population between Group 3 and Group 4 in 2014 were larger than the  
44  
45  
46 281 corresponding values in 2000. This indicates that the disparity in physician supply between urban  
47  
48  
49 282 and rural areas had widened over the study period. Group 3 had the lowest initial physician supply,  
50  
51  
52 283 and these regions may be facing a serious physician shortage. This issue should be explored further,  
53  
54 284 and there may be a need for major reforms to ensure adequate physician supply to rural areas. It may  
55  
56  
57  
58  
59  
60

1  
2  
3  
4  
5  
6 285 also be important to take the initiative in rural areas to improve physician productivity, reduce

7  
8  
9 286 non-essential workload, and implement technology-based measures such as telemedicine.

10  
11 287 Prior to 2004, the vast majority of medical graduates joined a medical specialty department

12  
13  
14 288 (known as an *Ikyoku*) at their university that secures employment for the new graduates. *Ikyoku*

15  
16  
17 289 generally dispatch physicians to other affiliated hospitals that are often located in rural areas. In this

18  
19  
20 290 way, the *Ikyoku* were partly responsible for preventing a shortage of physicians in rural areas. After

21  
22  
23 291 the implementation of a new post-graduate medical education program in 2004, fewer physicians

24  
25  
26 292 joined an *Ikyoku*. As a consequence, the graduates, now able to choose their training hospital after

27  
28  
29 293 graduation, were less likely to select a university hospital for training. Due to the decreasing number

30  
31  
32 294 of member physicians, it became more difficult for the *Ikyoku* to dispatch physicians to affiliate

33  
34 295 hospitals.<sup>14</sup> Previous studies have also reported that the new program may have exacerbated the

35  
36  
37 296 inequity in the geographic distribution of physicians.<sup>14 26</sup> Similarly, this new program may also have

38  
39  
40 297 contributed to the lack of improvement in geographic disparity observed in this study.

41  
42 298 The Japanese government has implemented several measures at the prefectural level aimed

43  
44  
45 299 at improving the geographic disparities in physician supply. In 2006, a "Council for Regional

46  
47  
48 300 Medicine" was established in each prefecture, and these councils include representatives of the

49  
50  
51 301 prefectural and local governments, hospitals, medical associations, universities, and residents. The

52  
53  
54 302 councils discuss detailed measures for securing medical staff with a variety of hospitals, including

1  
2  
3  
4  
5  
6 303 university hospitals and public hospitals. Furthermore, a "Support Center for Community Medicine"  
7  
8  
9 304 was established in each prefecture in 2011 to secure and retain physicians. These centers adopt the  
10  
11 305 role of "control towers" to address the uneven distribution of physicians within each prefecture.  
12  
13  
14 306 Specifically, the centers are responsible for supporting career advancement for physicians working in  
15  
16  
17 307 rural areas, acting as general liaisons for engaging new physicians, and providing general work  
18  
19  
20 308 information. In addition, the government has raised the regional quota of medical school admissions  
21  
22  
23 309 from 64 students in 2005 to 1 617 students in 2016. The students are obligated to work in a rural area  
24  
25  
26 310 or a designated specialty (such as OB/GYN) for nine years after graduating in return for financial  
27  
28 311 assistance for their studies.<sup>27</sup> As the program is relatively new, it remains unclear as to whether the  
29  
30  
31 312 increase in quotas will lead to improvements in the geographic disparity of physicians.

32  
33  
34 313         There are several limitations in this research. Firstly, the adjustment coefficients may  
35  
36  
37 314 continue to change in the future. However, the coefficients did not change considerably during the  
38  
39  
40 315 study period. In addition, it may be difficult to generalize our adjustment coefficients to other  
41  
42  
43 316 countries as they were calculated using Japanese health expenditure. On the other hand, the  
44  
45  
46 317 adjustment method itself may have applications in other countries. Secondly, there was a lack of  
47  
48 318 information on the physicians' working conditions, such as whether a physician worked full-time or  
49  
50  
51 319 part-time. It may be beneficial for future studies to incorporate mean physician working hours.  
52  
53  
54 320 Finally, there may be other ways to divide the SMAs for the subgroup analysis. However, our

1  
2  
3  
4  
5  
6 321 subgroup analysis was based on the categorization used in a previous study,<sup>19</sup> and provided an

7  
8  
9 322 intuitive understanding of the differences in group characteristics.

10  
11  
12 323

13  
14 324 **Conclusion**

15  
16  
17 325 The geographic distribution of physicians in Japan has failed to improve in any of the clinical

18  
19  
20 326 specialties. There is also a growing disparity in physician supply between the urban and rural areas.

21  
22  
23 327 In consideration of the rapidly aging population and the resulting changes in population structure,

24  
25  
26 328 urgent measures are needed to reduce the geographic disparities in physician supply and regulate the

27  
28  
29 329 uneven distribution among clinical specialties.

30  
31  
32 330

33  
34 331 **List of abbreviations**

35  
36  
37 332 OB/GYN, obstetrics and gynecology

38  
39  
40 333 MHLW, Ministry of Health, Labour and Welfare

41  
42  
43 334 SMA, secondary medical area

44  
45  
46 335

47  
48 336 **Footnotes**

49  
50  
51 337 **Acknowledgements**

52  
53  
54 338 Not applicable.

1  
2  
3  
4  
5  
6 339  
7

8  
9 340 **Competing interests**

10  
11 341 The authors declare that they have no competing interests.  
12  
13

14 342  
15

16  
17 343 **Funding**

18  
19  
20 344 This work was supported in part by a Health Sciences Research Grant from the  
21

22  
23 345 Ministry of Health, Labour and Welfare of Japan (Grant number: H27-iryō-ippān-001) ,  
24

25 346 a Grant-in-Aid for Scientific Research from the Japan Society for the Promotion of  
26

27  
28 347 Science (Grant number: [A]16H02634), and RISTEX, Japan Science and Technology  
29

30  
31 348 agency.  
32  
33

34 349  
35

36  
37 350 **Contributors**

38  
39  
40 351 KH contributed to the study conception and design, data collection, analysis,  
41

42 352 interpretation, and drafting the manuscript. SK and NS contributed to the data  
43

44  
45 353 collection and data management. YI contributed to the study design, data acquisition,  
46

47  
48 354 and interpretation. All authors critically revised the manuscript, and approved the final  
49

50  
51 355 version.  
52

53  
54 356  
55  
56  
57  
58  
59  
60

1  
2  
3  
4  
5  
6 357 **Ethics approval**

7  
8 358 Ethics committee approval was waived for this study because all of the data are publicly  
9  
10  
11 359 available online and comprise only aggregate values without any personally identifiable  
12  
13  
14 360 information.

15  
16  
17 361

18  
19  
20 362 **Role of the funding source**

21  
22 363 The funder of the study had no role in study design; collection, analysis, and interpretation of the  
23  
24 364 data; writing of the report; or the decision to submit the paper for publication. The corresponding  
25  
26 365 author had full access to all the data in the study and had final responsibility for the decision to  
27  
28 366 submit for publication.

29  
30  
31 367

32  
33  
34 368 **Data Sharing Statement**

35  
36 369 No additional data available.

37  
38  
39 370

40  
41  
42 371 **Consent for publication**

43  
44 372 Not applicable.

45  
46  
47 373

48  
49 374 1. Isabel C, Paula V. Geographic distribution of physicians in Portugal. *European Journal of*  
50  
51  
52  
53



- 1  
2  
3  
4  
5  
6 375 *Health Economics* 2010;11(4):383-93. doi: 10.1007/s10198-009-0208-8  
7  
8  
9 376 2. Kanchanachitra C, Lindelow M, Johnston T, et al. Human resources for health in  
10  
11 377 southeast Asia: shortages, distributional challenges, and international trade in  
12  
13  
14 378 health services. *Lancet* 2011;377(9767):769-81. doi: 10.1016/s0140-6736(10)62035-1  
15  
16  
17 379 [published Online First: 2011/01/29]  
18  
19  
20 380 3. Ricketts TC. The migration of physicians and the local supply of practitioners: a five-year  
21  
22  
23 381 comparison. *Acad Med* 2013;88(12):1913-8. doi: 10.1097/acm.0000000000000012  
24  
25  
26 382 [published Online First: 2013/10/17]  
27  
28  
29 383 4. Pitblado JR, and Raymond W. Pong. Geographic distribution of physicians in Canada.  
30  
31 384 Sudbury, Ontario, Canada: Centre for Rural and Northern Health Research,  
32  
33  
34 385 Laurentian University 1999.  
35  
36  
37 386 5. Kobayashi Y, Takaki H. Geographic distribution of physicians in Japan. *Lancet*  
38  
39  
40 387 1992;340(8832):1391-3. [published Online First: 1992/12/05]  
41  
42  
43 388 6. Tanihara S, Kobayashi Y, Une H, et al. Urbanization and physician maldistribution: a  
44  
45  
46 389 longitudinal study in Japan. *BMC Health Serv Res* 2011;11:260. doi:  
47  
48 390 10.1186/1472-6963-11-260 [published Online First: 2011/10/11]  
49  
50  
51 391 7. National Institute of Population and Social Security Research. population projection for  
52  
53  
54 392 Japan:2011-2060 2012 [Available from:

- 1  
2  
3  
4  
5  
6 393 <http://www.ipss.go.jp/syoushika/tohkei/newest04/gh2401.pdf> accessed 29 Feb 2016.  
7  
8  
9 394 8. Asano N, Kobayashi Y, Kano K. Issues of intervention aimed at preventing prospective  
10  
11 395 surplus of physicians in Japan. *Med Educ* 2001;35(5):488-94. [published Online  
12  
13  
14 396 First: 2001/05/01]  
15  
16  
17 397 9. Matsumoto M, Inoue K, Bowman R, et al. Self-employment, specialty choice, and  
18  
19  
20 398 geographical distribution of physicians in Japan: A comparison with the United  
21  
22  
23 399 States. *Health Policy* 2010;96(3):239-44. doi: 10.1016/j.healthpol.2010.02.008  
24  
25  
26 400 [published Online First: 2010/03/13]  
27  
28  
29 401 10. Rosenthal MB, Zaslavsky A, Newhouse JP. The geographic distribution of physicians  
30  
31 402 revisited. *Health Serv Res* 2005;40(6 Pt 1):1931-52. doi:  
32  
33  
34 403 10.1111/j.1475-6773.2005.00440.x [published Online First: 2005/12/13]  
35  
36  
37 404 11. Schwartz WB, Newhouse JP, Bennett BW, et al. The changing geographic distribution of  
38  
39  
40 405 board-certified physicians. *N Engl J Med* 1980;303(18):1032-8. doi:  
41  
42  
43 406 10.1056/nejm198010303031803 [published Online First: 1980/10/30]  
44  
45  
46 407 12. Study group on the supply and demand of physicians of the Ministry of Health LaW. The  
47  
48  
49 408 study group report on the supply and demand of physicians 2006 [Available from:  
50  
51  
52 409 <http://www.mhlw.go.jp/shingi/2006/07/dl/s0728-9c.pdf> accessed 16 Apr 2017.  
53  
54 410 13. Hara K, Otsubo T, Kunisawa S, et al. Examining sufficiency and equity in the geographic  
55  
56  
57  
58  
59  
60

- 1  
2  
3  
4  
5  
6 411 distribution of physicians in Japan: a longitudinal study. *BMJ Open*  
7  
8  
9 412 2017;7(3):e013922. doi: 10.1136/bmjopen-2016-013922 [published Online First:  
10  
11 413 2017/03/16]
- 14 414 14. Sakai R, Tamura H, Goto R, et al. Evaluating the effect of Japan's 2004 postgraduate  
15  
16  
17 415 training programme on the spatial distribution of physicians. *Hum Resour Health*  
18  
19  
20 416 2015;13:5. doi: 10.1186/1478-4491-13-5 [published Online First: 2015/01/27]
- 23 417 15. Gravelle H, Sutton M. Inequality in the geographical distribution of general  
24  
25  
26 418 practitioners in England and Wales 1974-1995. *J Health Serv Res Policy*  
27  
28 419 2001;6(1):6-13. [published Online First: 2001/02/24]
- 31 420 16. Anand S, Fan VY, Zhang J, et al. China's human resources for health: quantity, quality,  
32  
33  
34 421 and distribution. *Lancet* 2008;372(9651):1774-81. doi:  
35  
36  
37 422 10.1016/s0140-6736(08)61363-x [published Online First: 2008/10/22]
- 39 423 17. Mauguen A, Begg CB. Using the Lorenz Curve to Characterize Risk Predictiveness and  
40  
41  
42 424 Etiologic Heterogeneity. *Epidemiology* 2016;27(4):531-7. doi:  
43  
44  
45 425 10.1097/ede.0000000000000499 [published Online First: 2016/04/21]
- 48 426 18. Theodorakis PN, Mantzavinis GD, Rrumbullaku L, et al. Measuring health inequalities  
49  
50  
51 427 in Albania: a focus on the distribution of general practitioners. *Hum Resour Health*  
52  
53  
54 428 2006;4:5. doi: 10.1186/1478-4491-4-5 [published Online First: 2006/03/01]

- 1  
2  
3  
4  
5  
6 429 19. Sasaki H, Otsubo T, Imanaka Y. Widening disparity in the geographic distribution of  
7  
8  
9 430 pediatricians in Japan. *Hum Resour Health* 2013;11:59. doi:  
10  
11 431 10.1186/1478-4491-11-59 [published Online First: 2013/11/26]  
12  
13  
14 432 20. Kephart G, Asada Y. Need-based resource allocation: different need indicators, different  
15  
16  
17 433 results? *BMC Health Serv Res* 2009;9:122. doi: 10.1186/1472-6963-9-122 [published  
18  
19  
20 434 Online First: 2009/07/23]  
21  
22  
23 435 21. Hanazaki K, Tominaga R, Nio M, et al. Report from the Committee for Improving the  
24  
25  
26 436 Work Environment of Japanese Surgeons: survey on effects of the fee revision for  
27  
28  
29 437 medical services provided by surgeons. *Surg Today* 2013;43(11):1209-18. doi:  
30  
31 438 10.1007/s00595-013-0691-5 [published Online First: 2013/09/06]  
32  
33  
34 439 22. Fukuda Y, Harada T. Gender differences in specialty preference and mismatch with real  
35  
36  
37 440 needs in Japanese medical students. *BMC Med Educ* 2010;10:15. doi:  
38  
39  
40 441 10.1186/1472-6920-10-15 [published Online First: 2010/02/13]  
41  
42  
43 442 23. Jefferson L, Bloor K, Maynard A. Women in medicine: historical perspectives and recent  
44  
45  
46 443 trends. *Br Med Bull* 2015;114(1):5-15. doi: 10.1093/bmb/ldv007 [published Online  
47  
48  
49 444 First: 2015/03/11]  
50  
51 445 24. National Institute of Population and Social Security Research in Japan. Population  
52  
53  
54 446 Projections for Japan (April 2017) 2017 [cited 2017 Apr 14].  
55  
56  
57  
58  
59  
60

- 1  
2  
3  
4  
5  
6 447 25. Koike S, Matsumoto S, Kodama T, et al. Specialty choice and physicians' career paths in  
7  
8  
9 448 Japan: an analysis of National Physician Survey data from 1996 to 2006. *Health*  
10  
11 449 *Policy* 2010;98(2-3):236-44. doi: 10.1016/j.healthpol.2010.06.021 [published Online  
12  
13  
14 450 First: 2010/07/29]  
15  
16  
17 451 26. Toyabe S. Trend in geographic distribution of physicians in Japan. *Int J Equity Health*  
18  
19  
20 452 2009;8:5. doi: 10.1186/1475-9276-8-5 [published Online First: 2009/03/05]  
21  
22  
23 453 27. Matsumoto M, Takeuchi K, Tanaka J, et al. Follow-up study of the regional quota system  
24  
25  
26 454 of Japanese medical schools and prefecture scholarship programmes: a study  
27  
28 455 protocol. *BMJ Open* 2016;6(4):e011165. doi: 10.1136/bmjopen-2016-011165  
29  
30  
31 456 [published Online First: 2016/04/17]  
32  
33  
34 457  
35  
36  
37  
38  
39  
40  
41  
42  
43  
44  
45  
46  
47  
48  
49  
50  
51  
52  
53  
54  
55  
56  
57  
58  
59  
60

Figure 1 Adjustment coefficients of healthcare demand by age strata and sex

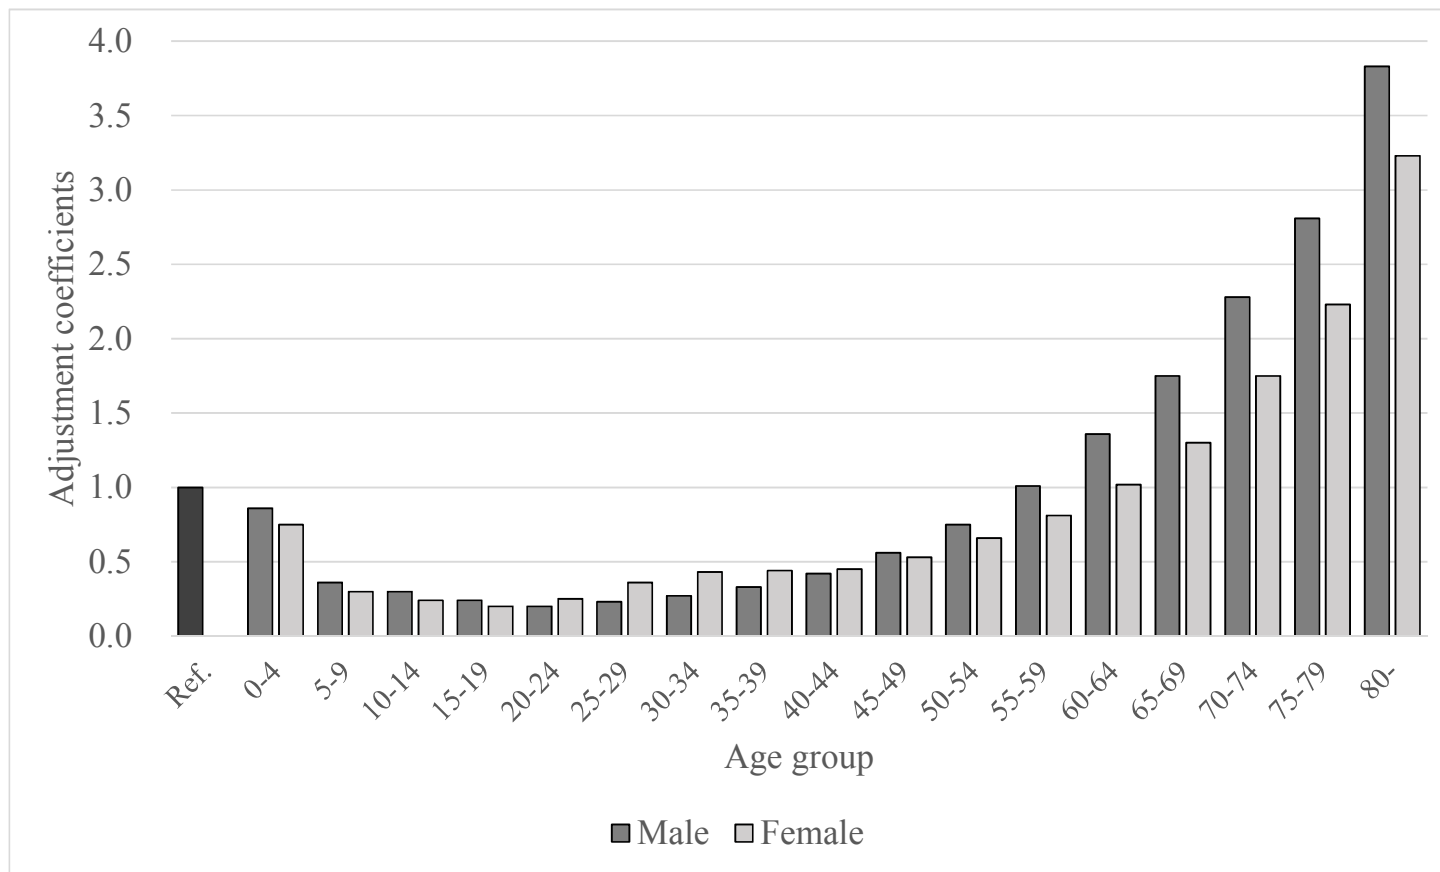

Ref.: reference value, which is the mean health expenditure per capita of all patients.

**Figure 2 Temporal increases in physician numbers from 2000 to 2014 for the four groups of secondary medical areas**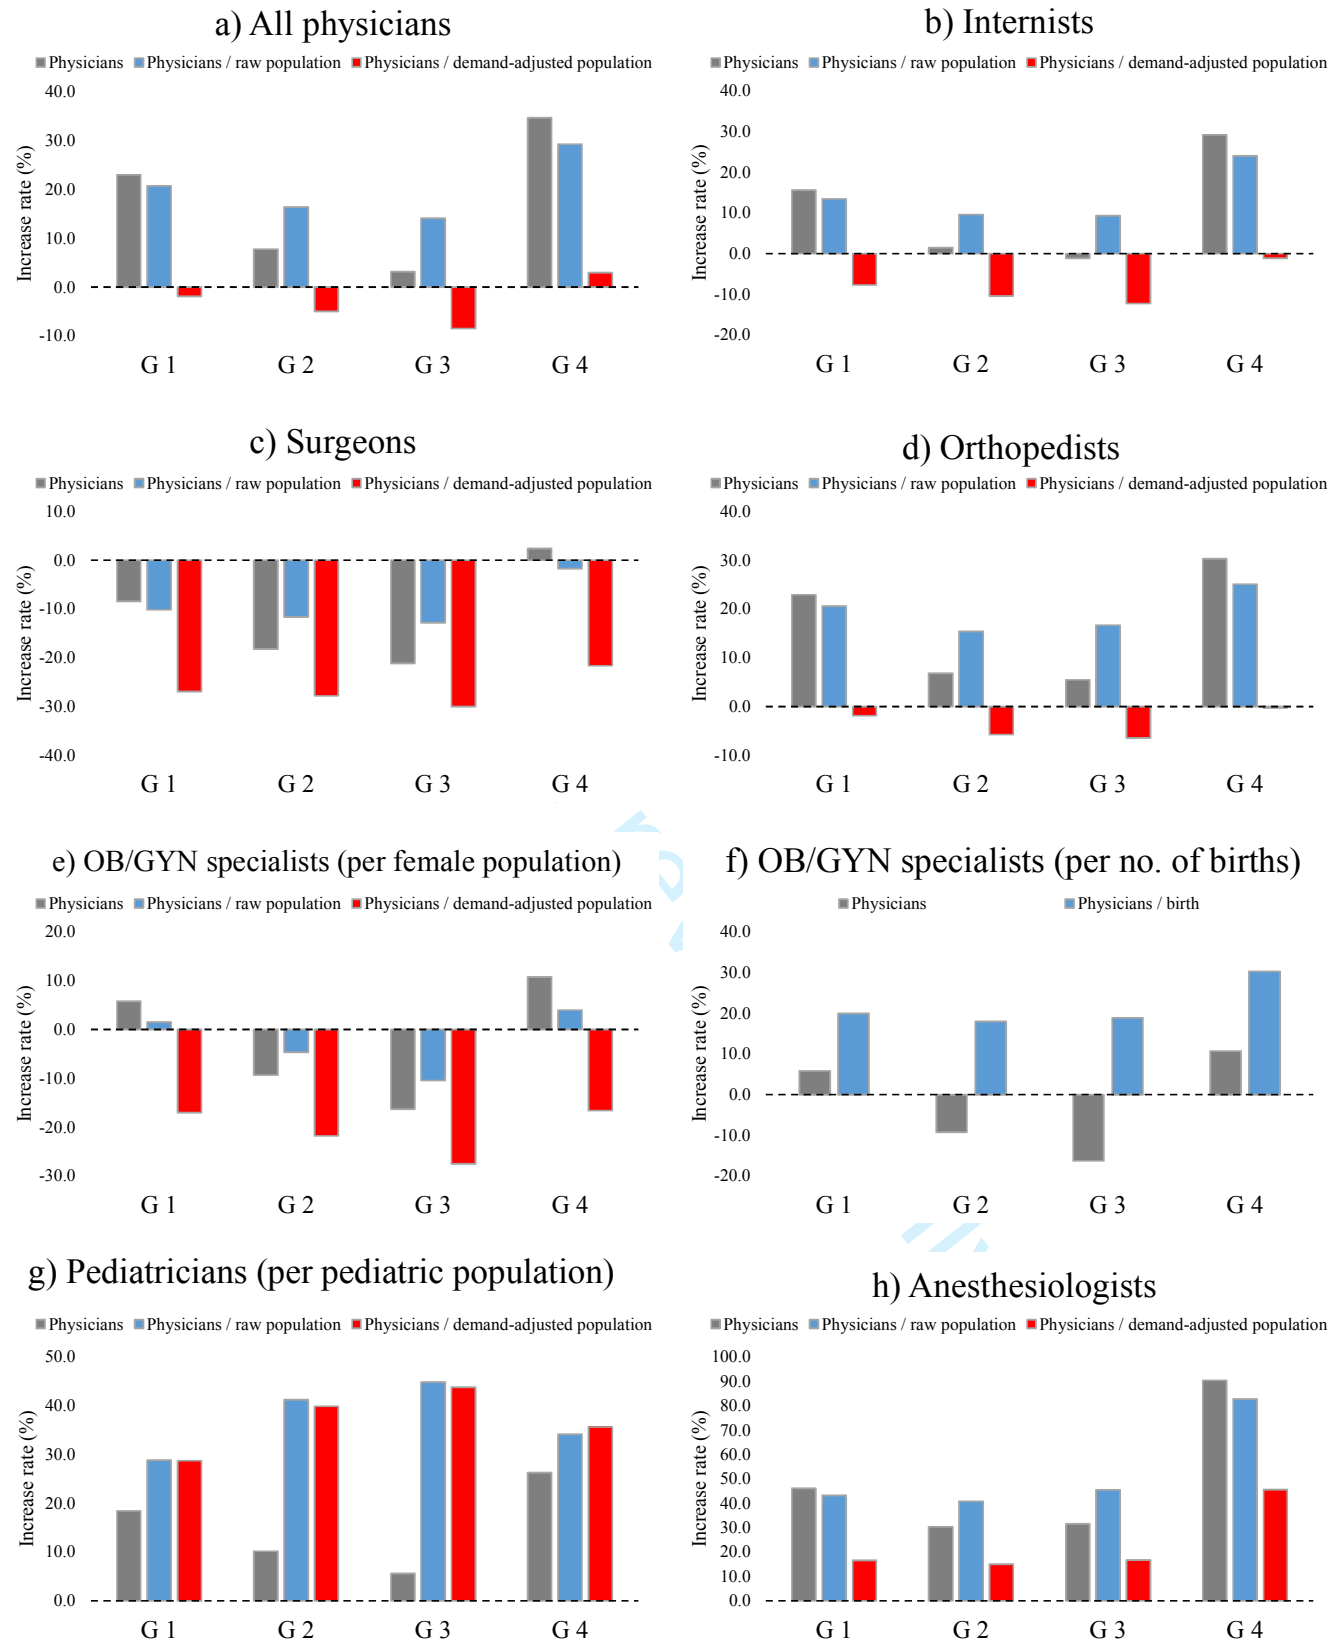

Group 1 (G1): urban areas with higher initial physician supply; Group 2 (G2): rural areas with higher initial physician supply; Group 3 (G3): rural areas with lower initial physician supply; Group 4 (G4): urban areas with lower initial physician supply. \* As the number of births was not adjusted for healthcare demand, the numbers of OB/GYN specialists per 100 000 demand-adjusted births are not shown. OB/GYN: obstetrics/gynecology

**Table 1 Population sizes in 2000 and 2014 before and after adjustment for healthcare demand**

| Year                   | Before adjustment |                   |                                     |                                 | After adjustment   |                    |                                     |
|------------------------|-------------------|-------------------|-------------------------------------|---------------------------------|--------------------|--------------------|-------------------------------------|
|                        | Total population  | Female population | Pediatric population * <sup>1</sup> | Number of births * <sup>2</sup> | Total population   | Female population  | Pediatric population * <sup>1</sup> |
| 2000                   | 126 071 305       | 55 196 259        | 18 553 275                          | 1 190 164                       | 101 697 295        | 48 349 047         | 8 546 612                           |
| 2014                   | 126 434 634       | 56 670 449        | 16 489 385                          | 1 003 474                       | 125 837 379        | 60 902 189         | 7 594 643                           |
| Increase in number (%) | 363 329 (0.3%)    | 1 474 190 (2.7%)  | -2 063 890 (-11.1%)                 | -186 690(-15.7%)                | 24 140 085 (23.7%) | 12 553 142 (26.0%) | -951 969 (-11.1%)                   |

Healthcare demand was adjusted by multiplying the raw population with adjustment coefficients that were calculated using health expenditure per capita stratified by age and sex.

\*<sup>1</sup> Pediatric population: all residents aged below 15 years.

\*<sup>2</sup> The number of births was not adjusted for healthcare demand.



**Table 2 Overall numbers of physicians and numbers of physicians per 100 000 population in 2000 and 2014**

| Year                                                               | Specialty      |                |                |               |                    |                                |                         |             |
|--------------------------------------------------------------------|----------------|----------------|----------------|---------------|--------------------|--------------------------------|-------------------------|-------------|
|                                                                    | All physicians | Internists     | Surgeons       | Orthopedists  | OB/GYN specialists | Pediatricians                  | Anesthesiologists       |             |
| <b>Overall number of physicians</b>                                |                |                |                |               |                    |                                |                         |             |
| 2000                                                               | 243 201        | 95 545         | 25 424         | 19 225        | 12 420             | 14 156                         | 5 751                   |             |
| 2014                                                               | 296 845        | 110 097        | 23 223         | 23 297        | 12 888             | 16 758                         | 8 625                   |             |
| Increase in number (%)                                             | 53 644 (22.1%) | 14 552 (15.2%) | -2 201 (-8.7%) | 4 072 (21.2%) | 468 (3.8%)         | 2 602 (18.4%)                  | 2 874 (50.0%)           |             |
| <b>Number of physicians per 100 000 population</b>                 |                |                |                |               |                    |                                |                         |             |
| Population type                                                    | Total          | Total          | Total          | Total         | Female             | Number of births <sup>*1</sup> | Pediatric <sup>*2</sup> | Total       |
| 2000                                                               | 192.9          | 75.8           | 20.2           | 15.2          | 22.5               | 1 043.6                        | 76.3                    | 4.6         |
| 2014                                                               | 234.8          | 87.1           | 18.4           | 18.4          | 22.7               | 1 284.3                        | 101.6                   | 6.8         |
| Increase in number (%)                                             | 41.9 (21.7%)   | 11.3 (14.9%)   | -1.8 (-8.9%)   | 3.2 (21.1%)   | 0.2 (0.9%)         | 240.7 (23.1%)                  | 25.3 (33.2%)            | 2.2 (47.8%) |
| <b>Number of physicians per 100 000 demand-adjusted population</b> |                |                |                |               |                    |                                |                         |             |
| Population type                                                    | Total          | Total          | Total          | Total         | Female             | Number of births <sup>*1</sup> | Pediatric <sup>*2</sup> | Total       |
| 2000                                                               | 239.1          | 94.0           | 25.0           | 18.9          | 25.7               | N/A                            | 165.6                   | 5.7         |
| 2014                                                               | 235.9          | 87.5           | 18.5           | 18.5          | 21.2               | N/A                            | 220.7                   | 6.9         |
| Increase in number (%)                                             | -3.2 (-1.3%)   | -6.5 (-6.9%)   | -6.5 (-26.0%)  | -0.4 (-2.1%)  | -4.5 (-17.5%)      | N/A                            | 55.1 (33.3%)            | 1.2 (21.1%) |

<sup>\*1</sup> As the number of births was not adjusted for healthcare demand, the numbers of OB/GYN specialists per 100 000 demand-adjusted births are not shown.

<sup>\*2</sup> Pediatric population: all residents aged below 15 years.

OB/GYN: obstetrics/gynecology

**Table 3 Trends in Gini coefficients for the number of physicians per 100 000 population in secondary medical areas by clinical specialty**

| Year                                                        | 2000  | 2002  | 2004  | 2006  | 2008  | 2010  | 2012  | 2014  | 2000-2014<br>changes |
|-------------------------------------------------------------|-------|-------|-------|-------|-------|-------|-------|-------|----------------------|
| Number of physicians per 100 000 population                 |       |       |       |       |       |       |       |       |                      |
| All physicians                                              | 0.195 | 0.193 | 0.194 | 0.194 | 0.199 | 0.202 | 0.205 | 0.206 | 0.011                |
| Internists                                                  | 0.183 | 0.179 | 0.177 | 0.175 | 0.177 | 0.179 | 0.183 | 0.181 | -0.002               |
| Surgeons                                                    | 0.204 | 0.202 | 0.197 | 0.190 | 0.194 | 0.206 | 0.210 | 0.209 | 0.005                |
| Orthopedists                                                | 0.202 | 0.201 | 0.196 | 0.191 | 0.195 | 0.193 | 0.192 | 0.196 | -0.006               |
| OB/GYN specialists (per<br>female population)               | 0.226 | 0.218 | 0.226 | 0.240 | 0.260 | 0.263 | 0.266 | 0.270 | 0.043                |
| OB/GYN specialists (per<br>number of births) *              | 0.231 | 0.220 | 0.227 | 0.225 | 0.243 | 0.243 | 0.248 | 0.250 | 0.019                |
| Pediatricians (per<br>pediatric population)                 | 0.248 | 0.244 | 0.239 | 0.243 | 0.246 | 0.244 | 0.247 | 0.246 | -0.003               |
| Anesthesiologists                                           | 0.445 | 0.435 | 0.438 | 0.433 | 0.434 | 0.428 | 0.432 | 0.429 | -0.016               |
| Number of physicians per 100 000 demand-adjusted population |       |       |       |       |       |       |       |       |                      |
| All physicians                                              | 0.212 | 0.210 | 0.214 | 0.219 | 0.227 | 0.231 | 0.234 | 0.237 | 0.025                |
| Internists                                                  | 0.186 | 0.182 | 0.185 | 0.184 | 0.191 | 0.194 | 0.199 | 0.199 | 0.013                |
| Surgeons                                                    | 0.204 | 0.202 | 0.198 | 0.189 | 0.199 | 0.213 | 0.218 | 0.219 | 0.015                |
| Orthopedists                                                | 0.215 | 0.212 | 0.208 | 0.204 | 0.211 | 0.211 | 0.210 | 0.213 | -0.002               |
| OB/GYN specialists (per<br>female population)               | 0.254 | 0.247 | 0.255 | 0.272 | 0.292 | 0.296 | 0.299 | 0.303 | 0.049                |
| Pediatricians (per<br>pediatric population)                 | 0.244 | 0.240 | 0.235 | 0.240 | 0.243 | 0.240 | 0.243 | 0.242 | -0.002               |
| Anesthesiologists                                           | 0.456 | 0.447 | 0.451 | 0.448 | 0.449 | 0.445 | 0.450 | 0.447 | -0.009               |

\* As the number of births was not adjusted for healthcare demand, the numbers of OB/GYN specialists per 100 000 demand-adjusted births are not shown.

OB/GYN: obstetrics/gynecology

**Table 4 Descriptive statistics of the number of physicians per 100 000 population in the four groups of secondary medical areas in 2000 and 2014**

|                                                            | Before adjustment |        | After adjustment |       |
|------------------------------------------------------------|-------------------|--------|------------------|-------|
|                                                            | 2000              | 2014   | 2000             | 2014  |
| Total number of physicians per 100 000 population          |                   |        |                  |       |
| Group 1                                                    | 247.0             | 297.9  | 311.6            | 305.7 |
| Group 2                                                    | 194.8             | 226.6  | 213.9            | 203.3 |
| Group 3                                                    | 124.6             | 142.1  | 138.9            | 127.0 |
| Group 4                                                    | 126.3             | 163.1  | 166.9            | 171.9 |
| Number of internists per 100 000 population                |                   |        |                  |       |
| Group 1                                                    | 95.2              | 108.0  | 120.1            | 110.8 |
| Group 2                                                    | 79.8              | 87.5   | 87.6             | 78.5  |
| Group 3                                                    | 54.0              | 59.1   | 60.2             | 52.8  |
| Group 4                                                    | 49.6              | 61.4   | 65.5             | 64.7  |
| Number of surgeons per 100 000 population                  |                   |        |                  |       |
| Group 1                                                    | 25.2              | 22.6   | 31.8             | 23.2  |
| Group 2                                                    | 21.8              | 19.3   | 24.0             | 17.3  |
| Group 3                                                    | 15.3              | 13.3   | 17.1             | 11.9  |
| Group 4                                                    | 12.9              | 12.7   | 17.0             | 13.3  |
| Number of orthopedists per 100 000 population              |                   |        |                  |       |
| Group 1                                                    | 18.6              | 22.4   | 23.5             | 23.0  |
| Group 2                                                    | 16.6              | 19.2   | 18.2             | 17.2  |
| Group 3                                                    | 10.8              | 12.6   | 12.0             | 11.2  |
| Group 4                                                    | 10.7              | 13.4   | 14.2             | 14.2  |
| Number of OB/GYN specialists per 100 000 female population |                   |        |                  |       |
| Group 1                                                    | 28.4              | 28.9   | 33.2             | 27.5  |
| Group 2                                                    | 20.2              | 19.3   | 20.3             | 15.8  |
| Group 3                                                    | 13.9              | 12.4   | 14.1             | 10.2  |
| Group 4                                                    | 16.3              | 17.0   | 20.0             | 16.7  |
| Number of OB/GYN specialists per 100 000 births *          |                   |        |                  |       |
| Group 1                                                    | 1316.5            | 1578.9 | N/A              | N/A   |
| Group 2                                                    | 1051.3            | 1240.3 | N/A              | N/A   |
| Group 3                                                    | 714.9             | 849.8  | N/A              | N/A   |
| Group 4                                                    | 702.1             | 914.7  | N/A              | N/A   |
| Number of pediatricians per 100 000 pediatric population   |                   |        |                  |       |

|   |         |      |      |       |       |
|---|---------|------|------|-------|-------|
| 1 |         |      |      |       |       |
| 2 | Group 1 | 49·0 | 63·1 | 211·5 | 272·3 |
| 3 | Group 2 | 35·5 | 50·2 | 158·0 | 221·0 |
| 4 | Group 3 | 22·6 | 32·7 | 100·7 | 144·8 |
| 5 | Group 4 | 27·3 | 36·7 | 117·6 | 159·4 |

8 Number of anesthesiologists per 100 000 population

|    |         |     |     |     |     |
|----|---------|-----|-----|-----|-----|
| 9  |         |     |     |     |     |
| 10 | Group 1 | 6·6 | 9·4 | 8·3 | 9·7 |
| 11 | Group 2 | 4·4 | 6·1 | 4·8 | 5·5 |
| 12 | Group 3 | 1·9 | 2·8 | 2·1 | 2·5 |
| 13 | Group 4 | 2·2 | 4·1 | 2·9 | 4·3 |

16 Group 1: urban areas with higher initial physician supply; Group 2: rural areas with higher initial physician  
 17 supply; Group 3: rural areas with lower initial physician supply; Group 4: urban areas with lower initial  
 18 physician supply.  
 19

20 \* As the number of births was not adjusted for healthcare demand, the numbers of OB/GYN specialists per  
 21 100 000 demand-adjusted births are not shown.  
 22

23 N/A: not applicable; OB/GYN: obstetrics/gynecology  
 24  
 25  
 26  
 27  
 28  
 29  
 30  
 31  
 32  
 33  
 34  
 35  
 36  
 37  
 38  
 39  
 40  
 41  
 42  
 43  
 44  
 45  
 46  
 47  
 48  
 49  
 50  
 51  
 52  
 53  
 54  
 55  
 56  
 57  
 58  
 59  
 60

**Appendix table. Descriptive statistics of the four groups of secondary medical areas in 2000**

| Urban / Rural<br>Group     | Urban                |                      | Rural                |                      |
|----------------------------|----------------------|----------------------|----------------------|----------------------|
|                            | Group 1              | Group 4              | Group 2              | Group 3              |
|                            | Mean(SD)             | Mean(SD)             | Mean(SD)             | Mean(SD)             |
| Number of physicians       |                      |                      |                      |                      |
| Total physicians           | 1 536·0(1 409·7)     | 619·2(433·5)         | 352·0(295·3)         | 175·5(127·2)         |
| Internists                 | 592·0(566·4)         | 242·9(165·3)         | 144·3(105·2)         | 76·1(52·0)           |
| Surgeons                   | 156·5(142·1)         | 63·1(42·2)           | 39·5(28·4)           | 21·6(14·2)           |
| Orthopedists               | 115·8(94·4)          | 52·6(36·4)           | 30·0(25·9)           | 15·2(12·2)           |
| OB/GYN specialists         | 78·1(71·8)           | 34·1(26·3)           | 16·4(15·6)           | 8·6(6·5)             |
| Pediatricians              | 88·0(71·9)           | 40·3(31)             | 19·1(19·8)           | 9·6(7·8)             |
| Anesthesiologists          | 40·9(40·1)           | 10·9(9·8)            | 7·9(9·8)             | 2·7(3·2)             |
| Raw population             |                      |                      |                      |                      |
| Total population           | 621 865·5(458 098·5) | 490 244·5(341 301·8) | 180 718·5(125 140·5) | 140 925·7(100 156·8) |
| Female population          | 274 615·3(203 154·4) | 209 062·4(144 107·6) | 81 044·7(54 965·4)   | 62 047·6(43 331·9)   |
| Pediatric population       | 89 778·6(62 866·3)   | 73 620·8(48 171·0)   | 26 837·6(19 441·3)   | 21 202·8(15 429·6)   |
| Number of births *         | 41 599·4(29 459·0)   | 34 246·1(22 935·5)   | 12 070·9(8 837·2)    | 9 497·2(6 971·3)     |
| Demand-adjusted population |                      |                      |                      |                      |
| Total population           | 492 971·0(349 667·3) | 370 991·2(242 817·0) | 164 585·9(103 001·3) | 126 410·8(84 059·2)  |
| Female population          | 235 594·4(166 553·3) | 170 624·5(109 441·9) | 80 861·9(49 177·2)   | 61 184·3(39 965·6)   |
| Pediatric population       | 41 599·4(29 459·0)   | 34 246·1(22 935·5)   | 12 070·9(8 837·2)    | 9 497·2(6 971·3)     |

|                                           |                  |                  |              |              |
|-------------------------------------------|------------------|------------------|--------------|--------------|
| Area (km <sup>2</sup> )                   | 311·5(221·5)     | 242·8(141·4)     | 360·9(238·5) | 458·6(485·8) |
| Population density (per km <sup>2</sup> ) | 3 023·7(3 403·4) | 2 591·6(2 510·6) | 514·5(140·9) | 393·5(186·9) |

Group 1 and Group 2: Higher initial physician supply, Group 3 and Group 4: Lower initial physician supply.

\* The number of births was not adjusted for healthcare demand.

OB/GYN: obstetrics/gynecology; SD: standard deviation

# BMJ Open

## Examining changes in the equity of physician distribution in Japan: a specialty-specific longitudinal study

|                                 |                                                                                                                                                                                                                                                                                                                                                                                         |
|---------------------------------|-----------------------------------------------------------------------------------------------------------------------------------------------------------------------------------------------------------------------------------------------------------------------------------------------------------------------------------------------------------------------------------------|
| Journal:                        | <i>BMJ Open</i>                                                                                                                                                                                                                                                                                                                                                                         |
| Manuscript ID                   | bmjopen-2017-018538.R1                                                                                                                                                                                                                                                                                                                                                                  |
| Article Type:                   | Research                                                                                                                                                                                                                                                                                                                                                                                |
| Date Submitted by the Author:   | 19-Sep-2017                                                                                                                                                                                                                                                                                                                                                                             |
| Complete List of Authors:       | Hara, Koji; Kyoto University, Department of Healthcare Economics and Quality Management<br>Kunisawa, Susumu; Kyoto University, Department of Healthcare Economics and Quality Management<br>Sasaki, Noriko; Kyoto University, Department of Healthcare Economics and Quality Management<br>Imanaka, Yuichi; Kyoto University, Department of Healthcare Economics and Quality Management |
| <b>Primary Subject Heading</b>: | Health policy                                                                                                                                                                                                                                                                                                                                                                           |
| Secondary Subject Heading:      | Public health                                                                                                                                                                                                                                                                                                                                                                           |
| Keywords:                       | Inequity, Aging, Physician, Japan                                                                                                                                                                                                                                                                                                                                                       |
|                                 |                                                                                                                                                                                                                                                                                                                                                                                         |

SCHOLARONE™  
Manuscripts

Peer Review Only

1 Examining changes in the equity of physician distribution in  
2 Japan: a specialty-specific longitudinal study

3  
4 **Authors:**

5 Koji Hara MA, Susumu Kunisawa, PhD, Noriko Sasaki, PhD, and Yuichi Imanaka, PhD  
6 Department of Healthcare Economics and Quality Management, Graduate School of  
7 Medicine, Kyoto University; Yoshida Konoe-cho, Sakyo-ku, Kyoto City, Kyoto, Japan  
8 606-8501

9  
10 **Corresponding author:**

11 Yuichi Imanaka, Professor

12 Mailing address: Department of Healthcare Economics and Quality Management,  
13 Graduate School of Medicine, Kyoto University; Yoshida Konoe-cho, Sakyo-ku, Kyoto  
14 City, Kyoto, Japan 606-8501

15 Tel: +81 75 753 4454

16 Fax: +81 75 753 4455

17 Email: imanaka-y@umin.net

18



1  
2  
3  
4  
5  
6 19 **Word count:**  
7

8  
9 20 3 584 words  
10

11 21  
12  
13  
14  
15  
16  
17  
18  
19  
20  
21  
22  
23  
24  
25  
26  
27  
28  
29  
30  
31  
32  
33  
34  
35  
36  
37  
38  
39  
40  
41  
42  
43  
44  
45  
46  
47  
48  
49  
50  
51  
52  
53  
54  
55  
56  
57  
58  
59  
60

For peer review only

1  
2  
3  
4  
5  
6 22 Examining changes in the equity of physician distribution in  
7  
8  
9 23 Japan: a specialty-specific longitudinal study  
10  
11  
12 24

13  
14  
15 25 **Abstract**

16  
17 26 **Objectives**

18  
19  
20 27 In this longitudinal study, we examined changes in the geographic distribution of physicians in Japan  
21  
22  
23 28 from 2000 to 2014 by clinical specialty with adjustments for healthcare demand based on population  
24  
25  
26 29 structure.

27  
28  
29 30 **Methods**

30  
31 31 The Japanese population was adjusted for healthcare demand using health expenditure per capita  
32  
33  
34 32 stratified by age and sex. The numbers of physicians per 100 000 demand-adjusted population in  
35  
36  
37 33 2000 and 2014 were calculated for sub-prefectural regions known as secondary medical areas.  
38  
39  
40 34 Disparities in the geographic distribution of physicians for each specialty were assessed using Gini  
41  
42  
43 35 coefficients. A subgroup analysis was conducted by dividing the regions into four groups according  
44  
45  
46 36 to urban-rural classification and initial physician supply.

47  
48  
49 37 **Results**

50  
51 38 Over the study period, the number of physicians per 100 000 demand-adjusted population decreased  
52  
53  
54 39 in all clinical specialties (e.g., surgery: 26·0% decrease) except pediatrics (33·3% increase) and

1  
2  
3  
4  
5  
6 40 anesthesiology (21.1% increase). No reductions in geographic disparity were observed in any of the  
7  
8  
9 41 clinical specialties. Geographic disparity increased substantially in internal medicine, surgery, and  
10  
11 42 obstetrics and gynecology. Rural areas with lower initial physician supply experienced the highest  
12  
13  
14 43 decreases in physicians per 100 000 demand-adjusted population for all clinical specialties except  
15  
16  
17 44 pediatrics and anesthesiology. In contrast, urban areas with lower initial physician supply  
18  
19  
20 45 experienced the lowest decreases in physicians per 100 000 demand-adjusted population in internal  
21  
22  
23 46 medicine, surgery, orthopedics, and obstetrics and gynecology, but the highest increase in  
24  
25  
26 47 anesthesiology.

#### 28 **Conclusion**

30  
31 49 Between 2000 and 2014, the number of physicians per 100 000 demand-adjusted population in Japan  
32  
33  
34 50 decreased in all specialties except pediatrics and anesthesiology. There is also a growing urban-rural  
35  
36  
37 51 disparity in physician supply in all specialties except pediatrics. Additional measures may be needed  
38  
39  
40 52 to resolve these issues and improve physician distribution in Japan.

41  
42 53

1  
2  
3  
4  
5  
6 54 **Article Summary**

7  
8  
9 55 Strengths and limitations of this study

- 10  
11 56 • This study longitudinally examined specialty-specific changes in the geographic distribution of  
12  
13  
14 57 Japanese physicians with adjustments for healthcare demand according to population structure.  
15  
16  
17 58 • The adjustment method used in this study was previously verified, and enables adjustment for  
18  
19  
20 59 healthcare demand according to age strata using health expenditure per capita.  
21  
22  
23 60 • Both age and sex were included in the calculation of the adjustment coefficients to increase the  
24  
25  
26 61 accuracy of adjustments.  
27  
28  
29 62 • There was a lack of information on the physicians' working conditions, such as whether a  
30  
31  
32 63 physician worked full-time or part-time.  
33  
34  
35 64 • It may be difficult to generalize our adjustment coefficients to other countries as they were  
36  
37  
38 65 calculated using Japanese health expenditure, but the adjustment method itself may have  
39  
40  
41 66 applications in other countries.  
42  
43  
44  
45 67  
46  
47 68  
48  
49 69  
50  
51  
52  
53  
54  
55  
56  
57  
58  
59  
60

1  
2  
3  
4  
5  
6 **70 Introduction**

7  
8  
9 71 The presence of inequities in the geographic distribution of physicians is a major social problem in  
10  
11 72 many countries.<sup>1-4</sup> In Japan, the geographic disparity in physician supply has long been recognized  
12  
13  
14 73 as a serious flaw in the healthcare provision system.<sup>5,6</sup> The lack of regulations that dictate where  
15  
16  
17 74 individual physicians work in Japan has led to the concentration of physicians in urban regions and a  
18  
19  
20 75 shortfall in rural areas, thereby resulting in uneven access to health care throughout the country.<sup>5,6</sup>  
21  
22  
23 76 On the other hand, Japan has entered a period of population decline,<sup>7</sup> and an oversupply of  
24  
25  
26 77 physicians is imminent if their numbers continue to rise at current rates. Attempts to control the total  
27  
28  
29 78 number of physicians have been met with resistance from various interest groups.<sup>8</sup>

30  
31 79 In addition to the geographic disparity in physician supply, Japan also faces issues  
32  
33  
34 80 stemming from an uneven distribution of physicians among the clinical specialties.<sup>9</sup> Previous studies  
35  
36  
37 81 from the US have reported that the geographic distribution of physicians varies according to clinical  
38  
39  
40 82 specialty.<sup>10,11</sup> Similarly, geographic disparities in the number of physicians in pediatrics, obstetrics  
41  
42  
43 83 and gynecology (OB/GYN), and anesthesiology have been documented in Japan.<sup>12</sup> However, few  
44  
45  
46 84 studies have longitudinally examined the geographic distribution of physicians according to clinical  
47  
48  
49 85 specialty.

50  
51 86 Although the number of physicians per 100 000 population is generally used as an  
52  
53  
54 87 indicator when examining geographic disparities in physician supply, this measure involves a simple

1  
2  
3  
4  
5  
6 88 head count that does not account for the inherent variations in healthcare demand among the  
7  
8  
9 89 different age strata and sex.<sup>4</sup> Furthermore, Japan's population is aging at an unprecedented rate,  
10  
11 90 which has resulted in its transformation into the world's first "super-aged" society (where more than  
12  
13  
14 91 21% of a country's population is aged 65 years and older). As a consequence, the population  
15  
16  
17 92 structure in Japan is undergoing dramatic changes, which has invariably led to changes to healthcare  
18  
19  
20 93 demand. We previously reported that Japan's healthcare demand increased by 22% from 2000 to  
21  
22  
23 94 2014 amid worsening geographic disparity in physician supply.<sup>13</sup> However, studies have yet to be  
24  
25  
26 95 conducted on the disparity in Japan's physician supply for different clinical specialties while  
27  
28  
29 96 accounting for the differences in healthcare demand.

30  
31 97 This study aimed to longitudinally examine specialty-specific changes in the geographic  
32  
33  
34 98 distribution of physicians in Japan from 2000 to 2014 with adjustments for healthcare demand based  
35  
36  
37 99 on population structure.

38  
39  
40 100

## 41 42 101 **Methods**

### 43 44 45 102 Data source

46  
47  
48 103 Data on the number of physicians were obtained from the Survey of Physicians, Dentists, and

49  
50  
51 104 Pharmacists conducted every two years by the Ministry of Health, Labour and Welfare (MHLW).

52  
53  
54 105 Physicians in Japan are required to participate in this survey, which includes information on each

1  
2  
3  
4  
5  
6 106 physician's specialty and the type and location (municipality) of their workplace. Population data  
7  
8  
9 107 (age, sex, and location of residence) were extracted from the Annual Report of the National Basic  
10  
11 108 Resident Registration System published by the Ministry of Internal Affairs and Communications,  
12  
13  
14 109 and data on the number of births were obtained from the Annual Report of Vital Statistics published  
15  
16  
17 110 by the MHLW. We also acquired data on national health expenditure per capita according to patient  
18  
19  
20 111 age in 2013 from the MHLW. The total area of habitable land was ascertained from statistical reports  
21  
22  
23 112 on land areas of prefectures and municipalities by the Geospatial Information Authority of Japan.  
24  
25  
26 113  
27  
28 114 Physicians and population  
29  
30  
31 115 We targeted physicians working in clinical facilities (hospitals and clinics), and excluded physicians  
32  
33  
34 116 working in non-clinical facilities (e.g., research centers and government offices). The following  
35  
36  
37 117 clinical specialties were included in analysis: internal medicine, surgery, orthopedics, OB/GYN,  
38  
39  
40 118 pediatrics, and anesthesiology. Internal medicine, surgery, and orthopedics were selected because  
41  
42  
43 119 these departments generally have more physicians than other departments. The remaining three  
44  
45  
46 120 specialties were selected because of their previously reported geographic disparities in physician  
47  
48 121 supply throughout Japan.<sup>12</sup>  
49  
50

51 122 In addition to the total population, we also analyzed the female population, pediatric  
52  
53  
54 123 population (<15 years of age), and the number of births. With the exception of the number of births,  
55

1  
2  
3  
4  
5  
6 124 all study populations were adjusted for healthcare demand. We calculated the number of OB/GYN  
7  
8  
9 125 specialists per 100 000 female population and per 100 000 births, the number of pediatricians per  
10  
11 126 100 000 pediatric population, and the number of physicians per 100 000 population for each of the  
12  
13  
14 127 other clinical specialties.  
15  
16  
17 128  
18  
19  
20 129 Geographic unit  
21  
22  
23 130 The geographic unit of analysis was the secondary medical area (SMA). The Japanese government  
24  
25 131 has designated three regional levels of healthcare provision. Primary medical areas are geographic  
26  
27  
28 132 units where primary care is provided, and are demarcated by municipal borders. Tertiary medical  
29  
30  
31 133 areas are geographic units that provide advanced medical care, and are demarcated by prefectural  
32  
33  
34 134 borders. SMAs are set between primary and tertiary medical areas, and are regions where general  
35  
36  
37 135 medical care (such as inpatient care) is provided; these areas are composed of multiple  
38  
39  
40 136 municipalities. Each prefectural government stipulates the geographic and demographic range of the  
41  
42  
43 137 SMAs within their prefecture. As a result, the boundaries of each SMA can be altered in response to  
44  
45  
46 138 changes in healthcare demand. SMAs have been previously used to examine the inequities in  
47  
48 139 physician supply in Japan.<sup>6 14</sup> Because the number of SMAs varies slightly over time, this study was  
49  
50  
51 140 conducted using the 349 SMAs designated in 2012.  
52  
53  
54 141



1  
2  
3  
4  
5  
6 142 Analytical methods  
7

8  
9 143 This retrospective study longitudinally examined the changes in the geographic distribution of the  
10  
11 144 number of physicians by clinical specialty among Japan's SMAs from 2000 to 2014. The primary  
12  
13  
14 145 outcomes were the overall number of physicians per 100,000 population and the trends in Gini  
15  
16  
17 146 coefficients (indicating geographic disparity) for each specialty during the study period. The  
18  
19  
20 147 secondary outcomes were the changes in physician numbers during the same period for subgroups  
21  
22  
23 148 that were categorized according to regional characteristics (urban-rural classification and initial  
24  
25  
26 149 physician supply).

27  
28 150 The population was first adjusted using adjustment coefficients of healthcare demand,  
29  
30  
31 151 which were calculated based on the health expenditure per capita stratified by age and sex through a  
32  
33  
34 152 previously described method.<sup>13</sup> Health expenditure per capita is likely indicative of the general  
35  
36  
37 153 workload of healthcare providers.<sup>15</sup> These expenditures include those for both inpatient and  
38  
39  
40 154 outpatient services, and account for variations in patient health status.<sup>13</sup> The demand-adjusted  
41  
42  
43 155 population was generated by multiplying the raw population with the adjustment coefficients.

44  
45 156 Next, geographic disparity was assessed using the Gini coefficient. This indicator, which is  
46  
47  
48 157 widely used to examine disparity in the field of economics, has been applied to analyze geographic  
49  
50  
51 158 disparity in physician supply.<sup>15 16-18</sup> We calculated the Gini coefficients for each specialty every two  
52  
53  
54 159 years from 2000 to 2014. The coefficients, which take a value from 0 (indicating complete equality)

1  
2  
3  
4  
5  
6 160 to 1 (indicating complete inequality), measure departure from a uniform distribution by drawing  
7  
8  
9 161 Lorenz curves.<sup>17</sup> If the curves of two time points intersect, conclusions cannot be made as to whether  
10  
11 162 or not the inequity of distribution is increasing.<sup>18</sup> Thus, we plotted two Lorenz curves (one each for  
12  
13  
14 163 2000 and 2014) for each clinical specialty.

15  
16  
17 164 Finally, a subgroup analysis was conducted by dividing SMAs into groups according to  
18  
19  
20 165 two regional characteristics. Using the method described in Sasaki et al.,<sup>19</sup> we classified each SMA  
21  
22  
23 166 into one of four groups based on whether the SMA was an urban or rural area, and whether the SMA  
24  
25  
26 167 had a higher or lower initial physician supply in 2000. An SMA was designated an urban area (or a  
27  
28  
29 168 rural area) if its population density was higher (or lower) than the median value in all SMAs. The  
30  
31 169 population density of each SMA was calculated using the total area of habitable land and the  
32  
33  
34 170 population in 2000. Next, an SMA was designated as having a higher (or lower) initial physician  
35  
36  
37 171 supply if the number of physicians per 100 000 population was higher (or lower) than the median  
38  
39  
40 172 number of physicians per 100 000 population in all SMAs. The following four groups were  
41  
42  
43 173 analyzed: Group 1, which comprised urban areas with higher initial physician supply; Group 2,  
44  
45  
46 174 which comprised rural areas with higher initial physician supply; Group 3, which comprised rural  
47  
48  
49 175 areas with lower initial physician supply; and Group 4, which comprised urban areas with lower  
50  
51 176 initial physician supply. Data from 2000 were used for both the population and physicians. In this  
52  
53  
54 177 subgroup analysis, we compared the inter-group changes in the number of physicians per 100 000

1  
2  
3  
4  
5  
6 178 population between 2000 and 2014.  
7

8  
9 179 All analyses were performed using R statistical software (V.3.2.2).  
10

11 180  
12

13  
14 181 **Results**  
15

16  
17 182 Table 1 shows the population sizes of the total population, female population, and pediatric  
18  
19 183 population before and after applying the adjustment coefficients in 2000 and 2014. The adjustment  
20  
21 184 coefficients for the different age strata and sex are provided Appendix Figure. Before adjustment, the  
22  
23 185 total population did not substantially change throughout the study period. In contrast, the  
24  
25 186 demand-adjusted total population increased by 23.7% between 2000 and 2014. The number of births,  
26  
27 187 which was not adjusted for healthcare demand, decreased by 15.7%. The pediatric population  
28  
29 188 declined by 11.1% over the study period both before and after adjusting for healthcare demand.  
30  
31  
32  
33

34  
35  
36 189 Table 2 shows the overall number of physicians and the number of physicians per 100 000  
37  
38 190 population in 2000 and 2014. The overall number of all physicians increased by 22.1% over the  
39  
40 191 study period. Similarly, the number of all physicians per 100 000 population increased by 21.7%.  
41  
42  
43

44  
45 192 However, the number of all physicians per 100 000 demand-adjusted population decreased by 1.3%.  
46  
47

48 193 The number of physicians per 100,000 demand-adjusted population in surgery and OB/GYN  
49  
50 194 declined by 26.0% and 17.5%, respectively. In contrast, the number of OB/GYN specialists per  
51  
52 195 100,000 births increased by 23.1% due to the declining number of births. The number of physicians  
53  
54  
55

1  
2  
3  
4  
5  
6 196 per 100,000 demand-adjusted population in pediatrics and anesthesiology increased by 33.3% and  
7  
8  
9 197 21.1%, respectively.

10  
11 198 Table 3 shows the trends in Gini coefficients for the number of physicians per 100 000  
12  
13  
14 199 population in the SMAs by clinical specialty. There were no substantial changes in the Gini  
15  
16  
17 200 coefficients for the numbers of orthopedists, pediatricians, and anesthesiologists per 100 000  
18  
19  
20 201 demand-adjusted population. However, inequity increased in the geographic distribution of internists,  
21  
22  
23 202 surgeons, and OB/GYN specialists (for both the female population and the number of births). In  
24  
25  
26 203 each of these three specialties, the Lorenz curve in 2014 tended to deteriorate more than the curve in  
27  
28  
29 204 2000 without intersection between the two curves (figures not shown). When comparing the Gini  
30  
31  
32 205 coefficients before and after adjusting for healthcare demand, the trends in the coefficients were  
33  
34  
35 206 similar for each clinical specialty. However, the post-adjustment Gini coefficients for all clinical  
36  
37  
38 207 specialties (except for pediatrics) were higher than their pre-adjustment values.

39  
40 208 Table 4 summarizes the changes in the numbers of physicians per 100 000 population in  
41  
42  
43 209 the four groups of SMAs. Detailed descriptive statistics of the four groups are provided in the  
44  
45  
46 210 Appendix table. Figure 1 shows the temporal increases (2000 to 2014) in the number of physicians  
47  
48  
49 211 by clinical specialty in each group of SMAs. The temporal increases in the number of internists and  
50  
51  
52 212 orthopedists were similar to those for all physicians. The overall number of surgeons decreased in all  
53  
54  
55 213 groups except for Group 4, and the number of surgeons per 100 000 demand-adjusted population

1  
2  
3  
4  
5  
6 214 decreased by 20% to 30% in all groups. As shown in Table 4, the number of surgeons per 100 000  
7  
8  
9 215 demand-adjusted population in Group 3 (11·9) was approximately half of the corresponding number  
10  
11  
12 216 in Group 1 (23·2) in 2014. In all groups, the number of OB/GYN specialists per 100 000  
13  
14  
15 217 demand-adjusted female population decreased, but the number of OB/GYN specialists per 100 000  
16  
17  
18 218 births increased. The number of pediatricians per 100 000 demand-adjusted pediatric population  
19  
20  
21 219 increased more in the rural SMAs than in the urban SMAs. The number of anesthesiologists per 100  
22  
23 220 000 demand-adjusted population increased in all groups; in particular, the number in Group 4  
24  
25  
26 221 increased by more than twice that of the other groups. In all clinical specialties except pediatrics and  
27  
28  
29 222 anesthesiology, Group 3 had the highest decrease in the number of physicians per 100 000  
30  
31  
32 223 demand-adjusted population. The 2014-2000 difference and ratio of the number of physicians per  
33  
34  
35 224 100 000 demand-adjusted population between Groups 3 and 4 increased in all clinical specialties  
36  
37  
38 225 except pediatrics.  
39  
40  
41  
42  
43 226  
44  
45  
46  
47  
48  
49  
50  
51  
52  
53  
54  
55  
56  
57  
58  
59  
60

## 227 **Discussion**

228 The four major findings of this study are as follows: First, the demand-adjusted population increased  
229 by 23·7% between 2000 and 2014, whereas the demand-adjusted pediatric population decreased by  
230 11·1%. Second, the number of physicians per 100 000 demand-adjusted population decreased in all  
231 clinical specialties except pediatrics and anesthesiology. The largest increase (33·3%) was observed

1  
2  
3  
4  
5  
6 232 in pediatrics. Third, the geographic disparity in the number of physicians per 100 000  
7  
8  
9 233 demand-adjusted population did not decline in all clinical specialties, and had in fact increased in  
10  
11 234 internal medicine, surgery, and OB/GYN. Fourth, rural areas with lower initial physician supply had  
12  
13  
14 235 the highest decrease in the number of physicians per 100 000 demand-adjusted population compared  
15  
16  
17 236 with other areas in all clinical specialties except pediatrics and anesthesiology. In contrast, urban  
18  
19  
20 237 areas with lower initial physician supply had the lowest decrease in internal medicine, surgery,  
21  
22  
23 238 orthopedics and OBG/GYN, but the highest increase in anesthesiology.

24  
25 239 The population used in this study was adjusted for healthcare demand among the different  
26  
27  
28 240 age strata and sex using a previously described method.<sup>13</sup> Although several studies have examined  
29  
30  
31 241 the demand-adjusted geographic disparity in physician supply,<sup>15 20</sup> there is currently no gold standard  
32  
33  
34 242 method for adjustment.<sup>20</sup> The method used in this study was previously verified,<sup>13</sup> and enables  
35  
36  
37 243 adjustment for healthcare demand according to age strata. In addition, the inclusion of sex in the  
38  
39  
40 244 calculation of the coefficients may increase the accuracy of adjustments.

41  
42 245 The number of physicians per 100 000 demand-adjusted population decreased in internal  
43  
44  
45 246 medicine, surgery, orthopedics, and OB/GYN (per female population). The decline in physician  
46  
47  
48 247 supply was particularly large in surgery and OB/GYN, which corroborates previously reported  
49  
50  
51 248 downward trends in the numbers of physicians in these specialties.<sup>12</sup> The distribution among  
52  
53  
54 249 specialties is affected by physician preference, experience, and environment. For example, the

1  
2  
3  
4  
5  
6 250 shortage of surgeons may be influenced by the long working hours, high risk of medical litigation,  
7  
8  
9 251 and low reward for surgical skill.<sup>21</sup> Previous research has also shown that an increase in female  
10  
11  
12 252 physicians has affected the distribution of specialties because they are more likely to choose  
13  
14  
15 253 OB/GYN and pediatrics instead of surgery.<sup>22 23</sup> In order to ensure a high number of both female and  
16  
17  
18 254 male physicians, we believe that improvements should be made to the working environment, such as  
19  
20  
21 255 a reduction in physician working hours by assigning more duties and responsibilities to  
22  
23  
24 256 non-physician health professionals.<sup>21</sup> On the other hand, there was a large increase in the number of  
25  
26  
27 257 anesthesiologists during the study period. Japan is experiencing an increasing need for  
28  
29  
30 258 anesthesiologists due to the rising number of surgeries conducted, the increasing complexity of  
31  
32  
33 259 surgery owing to advances in surgical techniques and the overall aging of patients, as well as the  
34  
35  
36 260 growing social expectations for safety in anesthesia.<sup>24</sup> Due to the initial shortage of anesthesiologists,  
37  
38  
39 261 the offering of higher salaries may have contributed to attracting more specialists. In addition, the  
40  
41  
42 262 increase in anesthesiologists may have been influenced by the growing number of female physicians.  
43  
44  
45 263 Because anesthesiologists generally do not have their own patients or on-call duties, this specialty  
46  
47  
48 264 may be more compatible with raising families. The increase in female anesthesiologists from 26.7%  
49  
50  
51 265 to 37.6% during the study period is consistent with this possibility.

52  
53  
54 266 Our findings detected a decrease in the numbers of internists and orthopedists despite an  
55  
56  
57 267 increase in healthcare demand. On the other hand, the number of pediatricians per 100 000

1  
2  
3  
4  
5  
6 268 demand-adjusted pediatric population and OB/GYN specialists per 100 000 births greatly increased  
7  
8  
9 269 due to a decline in the pediatrics population and the number of births. The rate of pediatric  
10  
11 270 population decline is expected to eventually exceed the rate of total population decline.<sup>25</sup> It may  
12  
13  
14 271 therefore be more useful to ensure the optimal allocation of physicians instead of simply increasing  
15  
16  
17 272 their overall numbers.

18  
19  
20 273         Based on the analysis of Gini coefficients, there were no reductions in geographic disparity  
21  
22  
23 274 in the number of physicians per 100 000 demand-adjusted population in all clinical specialties  
24  
25  
26 275 between 2000 and 2014. In particular, the inequity in physician supply increased in internal medicine,  
27  
28 276 surgery, and OB/GYN. The inequity in surgery and OB/GYN may have been influenced by the  
29  
30  
31 277 decrease or lack of increase in the overall number of physicians in these specialties. These findings  
32  
33  
34 278 suggest that the uneven distribution of physicians among the clinical specialties may exacerbate  
35  
36  
37 279 geographic disparities in physician supply. On the other hand, the number of internists increased at a  
38  
39  
40 280 rate that was comparable to the overall growth rate. The increase in geographic disparity may  
41  
42  
43 281 therefore be related to an increasing tendency toward physician specialization in Japan.<sup>26</sup> Although  
44  
45  
46 282 the overall number of general internists decreased from 74 539 to 61 317 over the study period, there  
47  
48  
49 283 was actually an increase from 21 006 to 48 780 physicians in internal subspecialties such as  
50  
51  
52 284 pulmonary, cardiovascular, and gastrointestinal medicine (data not shown). The geographic disparity  
53  
54 285 in physician supply in these subspecialties is greater than the disparity in general internists.<sup>9</sup>



1  
2  
3  
4  
5  
6 286 The rate of increase in the number of physicians per 100 000 demand-adjusted population  
7  
8  
9 287 in the urban areas was generally higher than in the rural areas. In all clinical specialties except  
10  
11 288 pediatrics, both the difference and ratio in the number of physicians per 100 000 demand-adjusted  
12  
13  
14 289 population between Group 3 and Group 4 in 2014 were larger than the corresponding values in 2000.  
15  
16  
17 290 This indicates that the urban-rural disparity in physician supply widened over the study period.  
18  
19  
20 291 Group 3 had the lowest initial physician supply, and these regions may be facing a serious physician  
21  
22  
23 292 shortage. This issue should be explored further, and there may be a need for major reforms to ensure  
24  
25  
26 293 adequate physician supply to rural areas. It may also be important to implement measures in rural  
27  
28  
29 294 areas to improve physician productivity, reduce non-essential workload, and implement  
30  
31 295 technology-based systems such as telemedicine.  
32  
33

34 296 Prior to 2004, the vast majority of medical graduates joined a clinical specialty department  
35  
36  
37 297 (known as an *Ikyoku*) at their university that secures employment for the new graduates. *Ikyoku*  
38  
39  
40 298 generally dispatch physicians to other affiliated hospitals that are often located in rural areas. In this  
41  
42  
43 299 way, the *Ikyoku* were partly responsible for preventing a shortage of physicians in rural areas. On the  
44  
45  
46 300 other hand, medical graduates did not receive mandatory clinical training under this system. As a  
47  
48  
49 301 result, few graduates were able to acquire a wide range of medical skills through comprehensive and  
50  
51 302 systematic training.<sup>27</sup> In addition, training assessments were not adequately performed under the  
52  
53  
54 303 *Ikyoku* system.<sup>27</sup> In order to improve the overall quality of clinical training throughout Japan, the  
55  
56  
57  
58  
59  
60

1  
2  
3  
4  
5  
6 304 MHLW mandated a standardized 2-year training program in 2004. Furthermore, there was a large  
7  
8  
9 305 increase in the number of non-university hospitals that medical graduates could attend as part of this  
10  
11 306 training program after 2004. As a consequence, the graduates, now able to choose their training  
12  
13  
14 307 hospital after graduation, were less likely to select a university hospital for training. Due to the  
15  
16  
17 308 decreasing number of member physicians, it became more difficult for the *Ikyoku* to dispatch  
18  
19  
20 309 physicians to affiliate hospitals.<sup>14</sup> Previous studies have also reported that the new program may  
21  
22  
23 310 have increased the inequity in the geographic distribution of physicians<sup>14 28</sup>. Similarly, this new  
24  
25  
26 311 program may also have contributed to the lack of reduction in geographic disparity in this study.

27  
28 312 The Japanese government has implemented several measures at the prefectural level aimed  
29  
30  
31 313 at reducing the geographic disparity in physician supply. In 2006, a "Council for Regional Medicine"  
32  
33  
34 314 was established in each prefecture, and these councils include representatives of the prefectural and  
35  
36  
37 315 local governments, hospitals, medical associations, universities, and residents. The councils discuss  
38  
39  
40 316 detailed measures for securing medical staff with a variety of hospitals, including university  
41  
42  
43 317 hospitals and public hospitals. Furthermore, a "Support Center for Community Medicine" was  
44  
45  
46 318 established in each prefecture in 2011 to secure and retain physicians. These centers adopt the role of  
47  
48  
49 319 "control towers" to address the uneven distribution of physicians within each prefecture. Specifically,  
50  
51  
52 320 the centers are responsible for supporting career advancement for physicians working in rural areas,  
53  
54 321 acting as general liaisons for engaging new physicians, and providing general work information. In

1  
2  
3  
4  
5  
6 322 addition, the government has raised the regional quota of medical school admissions from 64  
7  
8  
9 323 students in 2005 to 1 617 students in 2016. The students are obligated to work in a rural area or a  
10  
11 324 designated specialty (such as OB/GYN) for nine years after graduating in return for financial  
12  
13  
14 325 assistance for their studies.<sup>29</sup> As the program is relatively new, it remains unclear as to whether the  
15  
16  
17 326 increase in quotas will lead to reductions in the geographic disparity of physicians.

18  
19  
20 327         There are several limitations in this research. First, the adjustment coefficients may  
21  
22  
23 328 continue to change in the future. However, the coefficients did not fluctuate considerably during the  
24  
25  
26 329 study period. In addition, it may be difficult to generalize our adjustment coefficients to other  
27  
28  
29 330 countries as they were calculated using Japanese health expenditure. Nevertheless, the adjustment  
30  
31  
32 331 method itself may have applications in other countries. Second, there was a lack of information on  
33  
34  
35 332 the physicians' working conditions, such as whether a physician worked full-time or part-time. It  
36  
37  
38 333 may be beneficial for future studies to incorporate mean physician working hours. Finally, there may  
39  
40  
41 334 be other ways to divide the SMAs for the subgroup analysis. However, our subgroup analysis was  
42  
43  
44 335 based on the categorization used in a previous study,<sup>19</sup> and provided an intuitive understanding of the  
45  
46  
47 336 differences in group characteristics.

48 337

## 51 338 **Conclusion**

52  
53  
54 339 Between 2000 and 2014, the number of physicians per 100 000 demand-adjusted population in Japan

1  
2  
3  
4  
5  
6 340 decreased in all specialties except pediatrics and anesthesiology. There is also a growing urban-rural  
7  
8  
9 341 disparity in physician supply in all specialties except pediatrics. In consideration of the rapidly aging  
10  
11  
12 342 population and the resulting changes in population structure, additional measures may be needed to  
13  
14  
15 343 resolve these issues and improve physician distribution in Japan.  
16

17 344

18  
19  
20 345 **List of abbreviations**

21  
22 346 OB/GYN, obstetrics and gynecology

23  
24  
25 347 MHLW, Ministry of Health, Labour and Welfare

26  
27  
28 348 SMA, secondary medical area

29  
30  
31 349

32  
33  
34 350 **Footnotes**

35  
36  
37 351 **Acknowledgements**

38  
39  
40 352 Not applicable.

41  
42  
43 353

44  
45 354 **Competing interests**

46  
47  
48 355 The authors declare that they have no competing interests.

49  
50  
51 356

52  
53  
54 357 **Funding**

1  
2  
3  
4  
5  
6 358 This work was supported in part by a Health Sciences Research Grant from the Ministry of Health,  
7  
8  
9 359 Labour and Welfare of Japan (Grant number: H27-iryō-ippān-001), a Grant-in-Aid for Scientific  
10  
11 360 Research from the Japan Society for the Promotion of Science (Grant number: [A]16H02634), and  
12  
13  
14 361 RISTEX, Japan Science and Technology Agency.  
15

16  
17 362

18  
19  
20 363 **Contributors**

21  
22 364 KH contributed to the study conception and design, data collection, analysis, interpretation, and  
23  
24  
25 365 drafting of the manuscript. SK and NS contributed to the data collection and data management. YI  
26  
27  
28 366 contributed to the study design, data acquisition, and interpretation. All authors critically revised the  
29  
30  
31 367 manuscript, and approved the final version.  
32

33  
34 368

35  
36  
37 369 **Ethics approval**

38  
39  
40 370 Ethics committee approval was waived for this study because all of the data are publicly available  
41  
42  
43 371 online and comprise only aggregate values without any personally identifiable information.  
44

45 372

46  
47  
48 373 **Role of the funding source**

49  
50  
51 374 The funder of the study had no role in study design; collection, analysis, and interpretation of the  
52  
53  
54 375 data; writing of the report; or the decision to submit the paper for publication. The corresponding  
55

1  
2  
3  
4  
5  
6 376 author had full access to all the data in the study and had final responsibility for the decision to

7  
8  
9 377 submit for publication.

10  
11 378

12  
13  
14 379 **Data sharing statement**

15  
16  
17 380 No additional data available.

18  
19  
20 381

21  
22 382 **Consent for publication**

23  
24  
25 383 Not applicable.

26  
27  
28 384

29  
30  
31 385 1. Isabel C, Paula V. Geographic distribution of physicians in Portugal. *European Journal of Health*

32  
33  
34 386 *Economics* 2010;11(4):383-93. doi: 10.1007/s10198-009-0208-8

35  
36  
37 387 2. Kanchanachitra C, Lindelow M, Johnston T, et al. Human resources for health in southeast Asia:

38  
39  
40 388 shortages, distributional challenges, and international trade in health services. *Lancet*

41  
42 389 2011;377(9767):769-81. doi: 10.1016/s0140-6736(10)62035-1 [published Online First:

43  
44  
45 390 2011/01/29]

46  
47  
48 391 3. Ricketts TC. The migration of physicians and the local supply of practitioners: a five-year comparison.

49  
50  
51 392 *Acad Med* 2013;88(12):1913-8. doi: 10.1097/acm.0000000000000012 [published Online First:

52  
53  
54 393 2013/10/17]

- 1  
2  
3  
4  
5  
6 394 4. Pitblado JR, and Raymond W. Pong. Geographic distribution of physicians in Canada. Sudbury,  
7  
8  
9 395 Ontario, Canada: Centre for Rural and Northern Health Research, Laurentian University 1999.  
10  
11 396 5. Kobayashi Y, Takaki H. Geographic distribution of physicians in Japan. *Lancet* 1992;340(8832):1391-3.  
12  
13  
14 397 [published Online First: 1992/12/05]  
15  
16  
17 398 6. Tanihara S, Kobayashi Y, Une H, et al. Urbanization and physician maldistribution: a longitudinal study  
18  
19  
20 399 in Japan. *BMC Health Serv Res* 2011;11:260. doi: 10.1186/1472-6963-11-260 [published Online  
21  
22  
23 400 First: 2011/10/11]  
24  
25  
26 401 7. National Institute of Population and Social Security Research. population projection for  
27  
28 402 Japan:2011-2060 2012 [Available from:  
29  
30  
31 403 <http://www.ipss.go.jp/syoushika/tohkei/newest04/gh2401.pdf> accessed 29 Feb 2016.  
32  
33  
34 404 8. Asano N, Kobayashi Y, Kano K. Issues of intervention aimed at preventing prospective surplus of  
35  
36  
37 405 physicians in Japan. *Med Educ* 2001;35(5):488-94. [published Online First: 2001/05/01]  
38  
39  
40 406 9. Matsumoto M, Inoue K, Bowman R, et al. Self-employment, specialty choice, and geographical  
41  
42  
43 407 distribution of physicians in Japan: A comparison with the United States. *Health Policy*  
44  
45  
46 408 2010;96(3):239-44. doi: 10.1016/j.healthpol.2010.02.008 [published Online First: 2010/03/13]  
47  
48  
49 409 10. Rosenthal MB, Zaslavsky A, Newhouse JP. The geographic distribution of physicians revisited.  
50  
51  
52 410 *Health Serv Res* 2005;40(6 Pt 1):1931-52. doi: 10.1111/j.1475-6773.2005.00440.x [published  
53  
54 411 Online First: 2005/12/13]  
55

- 1  
2  
3  
4  
5  
6 412 11. Schwartz WB, Newhouse JP, Bennett BW, et al. The changing geographic distribution of  
7  
8  
9 413 board-certified physicians. *N Engl J Med* 1980;303(18):1032-8. doi:  
10  
11 414 10.1056/nejm198010303031803 [published Online First: 1980/10/30]  
12  
13  
14 415 12. Study group on the supply and demand of physicians of the Ministry of Health LaW. The study group  
15  
16  
17 416 report on the supply and demand of physicians 2006 [Available from:  
18  
19  
20 417 <http://www.mhlw.go.jp/shingi/2006/07/dl/s0728-9c.pdf> accessed 16 Apr 2017.  
21  
22  
23 418 13. Hara K, Otsubo T, Kunisawa S, et al. Examining sufficiency and equity in the geographic distribution  
24  
25  
26 419 of physicians in Japan: a longitudinal study. *BMJ Open* 2017;7(3):e013922. doi:  
27  
28 420 10.1136/bmjopen-2016-013922 [published Online First: 2017/03/16]  
29  
30  
31 421 14. Sakai R, Tamura H, Goto R, et al. Evaluating the effect of Japan's 2004 postgraduate training  
32  
33  
34 422 programme on the spatial distribution of physicians. *Hum Resour Health* 2015;13:5. doi:  
35  
36  
37 423 10.1186/1478-4491-13-5 [published Online First: 2015/01/27]  
38  
39  
40 424 15. Gravelle H, Sutton M. Inequality in the geographical distribution of general practitioners in England  
41  
42  
43 425 and Wales 1974-1995. *J Health Serv Res Policy* 2001;6(1):6-13. [published Online First:  
44  
45 426 2001/02/24]  
46  
47  
48 427 16. Anand S, Fan VY, Zhang J, et al. China's human resources for health: quantity, quality, and  
49  
50  
51 428 distribution. *Lancet* 2008;372(9651):1774-81. doi: 10.1016/s0140-6736(08)61363-x [published  
52  
53  
54 429 Online First: 2008/10/22]  
55



- 1  
2  
3  
4  
5  
6 430 17. Mauguen A, Begg CB. Using the Lorenz Curve to Characterize Risk Predictiveness and Etiologic  
7  
8  
9 431 Heterogeneity. *Epidemiology* 2016;27(4):531-7. doi: 10.1097/ede.0000000000000499 [published  
10  
11 432 Online First: 2016/04/21]  
12  
13  
14 433 18. Theodorakis PN, Mantzavinis GD, Rrumbullaku L, et al. Measuring health inequalities in Albania: a  
15  
16  
17 434 focus on the distribution of general practitioners. *Hum Resour Health* 2006;4:5. doi:  
18  
19  
20 435 10.1186/1478-4491-4-5 [published Online First: 2006/03/01]  
21  
22  
23 436 19. Sasaki H, Otsubo T, Imanaka Y. Widening disparity in the geographic distribution of pediatricians in  
24  
25  
26 437 Japan. *Hum Resour Health* 2013;11:59. doi: 10.1186/1478-4491-11-59 [published Online First:  
27  
28 438 2013/11/26]  
29  
30  
31 439 20. Kephart G, Asada Y. Need-based resource allocation: different need indicators, different results? *BMC*  
32  
33  
34 440 *Health Serv Res* 2009;9:122. doi: 10.1186/1472-6963-9-122 [published Online First:  
35  
36 441 2009/07/23]  
37  
38  
39 442 21. Hanazaki K, Tominaga R, Nio M, et al. Report from the Committee for Improving the Work  
40  
41  
42 443 Environment of Japanese Surgeons: survey on effects of the fee revision for medical services  
43  
44  
45 444 provided by surgeons. *Surg Today* 2013;43(11):1209-18. doi: 10.1007/s00595-013-0691-5  
46  
47  
48 445 [published Online First: 2013/09/06]  
49  
50  
51 446 22. Fukuda Y, Harada T. Gender differences in specialty preference and mismatch with real needs in  
52  
53  
54 447 Japanese medical students. *BMC Med Educ* 2010;10:15. doi: 10.1186/1472-6920-10-15  
55

- 1  
2  
3  
4  
5  
6 448 [published Online First: 2010/02/13]  
7  
8  
9 449 23. Jefferson L, Bloor K, Maynard A. Women in medicine: historical perspectives and recent trends. *Br*  
10  
11 450 *Med Bull* 2015;114(1):5-15. doi: 10.1093/bmb/ldv007 [published Online First: 2015/03/11]  
12  
13  
14 451 24. Tabayashi K, Sai S, Iguchi A, et al. Responding to lack of anesthesiologists thinking about the current  
15  
16  
17 452 situation of anesthesiologists shortage from the standpoint of surgeons [in Japanese]. *Journal of*  
18  
19  
20 453 *Japanese Association for Operating Room Technology* 2006;27(4):288-91.  
21  
22  
23 454 25. National Institute of Population and Social Security Research in Japan. Population Projections for  
24  
25  
26 455 Japan (April 2017) 2017 [cited 2017 Apr 14].  
27  
28  
29 456 26. Koike S, Matsumoto S, Kodama T, et al. Specialty choice and physicians' career paths in Japan: an  
30  
31 457 analysis of National Physician Survey data from 1996 to 2006. *Health Policy*  
32  
33  
34 458 2010;98(2-3):236-44. doi: 10.1016/j.healthpol.2010.06.021 [published Online First: 2010/07/29]  
35  
36  
37 459 27. Ministry of Health, Labour and Welfare. A history of post-graduate clinical training system [in  
38  
39  
40 460 Japanese] [Available from: <http://www.mhlw.go.jp/topics/bukyoku/isei/rinsyo/hensen/> accessed  
41  
42 461 1 Sep. 2017].  
43  
44  
45 462 28. Toyabe S. Trend in geographic distribution of physicians in Japan. *Int J Equity Health* 2009;8:5. doi:  
46  
47  
48 463 10.1186/1475-9276-8-5 [published Online First: 2009/03/05]  
49  
50  
51 464 29. Matsumoto M, Takeuchi K, Tanaka J, et al. Follow-up study of the regional quota system of Japanese  
52  
53  
54 465 medical schools and prefecture scholarship programmes: a study protocol. *BMJ Open*

1  
2  
3  
4  
5  
6 466 2016;6(4):e011165. doi: 10.1136/bmjopen-2016-011165 [published Online First: 2016/04/17]  
7  
8

9 467  
10

11 468 **Figure titles**  
12

13  
14 469 **Figure 1** Temporal increases in physician numbers from 2000 to 2014 for the four  
15

16  
17 470 groups of secondary medical areas  
18

19  
20 471 **Appendix Figure** Adjustment coefficients of healthcare demand by age strata and sex  
21

22 472  
23  
24

25 473 **Figure legend**  
26

27  
28 474 **Figure1**  
29

30  
31 475 Group 1 (G1): urban areas with higher initial physician supply; Group 2 (G2): rural  
32

33  
34 476 areas with higher initial physician supply; Group 3 (G3): rural areas with lower initial  
35

36  
37 477 physician supply; Group 4 (G4): urban areas with lower initial physician supply. \* As  
38

39  
40 478 the number of births was not adjusted for healthcare demand, the numbers of OB/GYN  
41

42  
43 479 specialists per 100 000 demand-adjusted births are not shown. OB/GYN:  
44

45 480 obstetrics/gynecology  
46  
47

48 481 **Appendix Figure**  
49

50  
51 482 Ref.: reference value, which is the mean health expenditure per capita of all patients.  
52  
53  
54  
55

**Table 1 Population sizes in 2000 and 2014 before and after adjustment for healthcare demand**

| Year                   | Before adjustment |                   |                         |                     | After adjustment   |                    |                         |
|------------------------|-------------------|-------------------|-------------------------|---------------------|--------------------|--------------------|-------------------------|
|                        | Total population  | Female population | Pediatric population *1 | Number of births *2 | Total population   | Female population  | Pediatric population *1 |
| 2000                   | 126 071 305       | 55 196 259        | 18 553 275              | 1 190 164           | 101 697 295        | 48 349 047         | 8 546 612               |
| 2014                   | 126 434 634       | 56 670 449        | 16 489 385              | 1 003 474           | 125 837 379        | 60 902 189         | 7 594 643               |
| Increase in number (%) | 363 329 (0.3%)    | 1 474 190 (2.7%)  | -2 063 890 (-11.1%)     | -186 690(-15.7%)    | 24 140 085 (23.7%) | 12 553 142 (26.0%) | -951 969 (-11.1%)       |

Healthcare demand was adjusted by multiplying the raw population with adjustment coefficients that were calculated using health expenditure per capita stratified by age and sex.

\*1 Pediatric population: all residents aged below 15 years.

\*2 The number of births was not adjusted for healthcare demand.

**Table 2 Overall numbers of physicians and numbers of physicians per 100 000 population in 2000 and 2014**

| Year                                                               | Specialty      |                |                |               |                    |                                |                         |             |
|--------------------------------------------------------------------|----------------|----------------|----------------|---------------|--------------------|--------------------------------|-------------------------|-------------|
|                                                                    | All physicians | Internists     | Surgeons       | Orthopedists  | OB/GYN specialists | Pediatricians                  | Anesthesiologists       |             |
| <b>Overall number of physicians</b>                                |                |                |                |               |                    |                                |                         |             |
| 2000                                                               | 243 201        | 95 545         | 25 424         | 19 225        | 12 420             | 14 156                         | 5 751                   |             |
| 2014                                                               | 296 845        | 110 097        | 23 223         | 23 297        | 12 888             | 16 758                         | 8 625                   |             |
| Increase in number (%)                                             | 53 644 (22.1%) | 14 552 (15.2%) | -2 201 (-8.7%) | 4 072 (21.2%) | 468 (3.8%)         | 2 602 (18.4%)                  | 2 874 (50.0%)           |             |
| <b>Number of physicians per 100 000 population</b>                 |                |                |                |               |                    |                                |                         |             |
| Population type                                                    | Total          | Total          | Total          | Total         | Female             | Number of births <sup>*1</sup> | Pediatric <sup>*2</sup> | Total       |
| 2000                                                               | 192.9          | 75.8           | 20.2           | 15.2          | 22.5               | 1 043.6                        | 76.3                    | 4.6         |
| 2014                                                               | 234.8          | 87.1           | 18.4           | 18.4          | 22.7               | 1 284.3                        | 101.6                   | 6.8         |
| Increase in number (%)                                             | 41.9 (21.7%)   | 11.3 (14.9%)   | -1.8 (-8.9%)   | 3.2 (21.1%)   | 0.2 (0.9%)         | 240.7 (23.1%)                  | 25.3 (33.2%)            | 2.2 (47.8%) |
| <b>Number of physicians per 100 000 demand-adjusted population</b> |                |                |                |               |                    |                                |                         |             |
| Population type                                                    | Total          | Total          | Total          | Total         | Female             | Number of births <sup>*1</sup> | Pediatric <sup>*2</sup> | Total       |
| 2000                                                               | 239.1          | 94.0           | 25.0           | 18.9          | 25.7               | N/A                            | 165.6                   | 5.7         |
| 2014                                                               | 235.9          | 87.5           | 18.5           | 18.5          | 21.2               | N/A                            | 220.7                   | 6.9         |
| Increase in number (%)                                             | -3.2 (-1.3%)   | -6.5 (-6.9%)   | -6.5 (-26.0%)  | -0.4 (-2.1%)  | -4.5 (-17.5%)      | N/A                            | 55.1 (33.3%)            | 1.2 (21.1%) |

<sup>\*1</sup> As the number of births was not adjusted for healthcare demand, the numbers of OB/GYN specialists per 100 000 demand-adjusted births are not shown.

<sup>\*2</sup> Pediatric population: all residents aged below 15 years.

OB/GYN: obstetrics/gynecology

**Table 3 Trends in Gini coefficients for the number of physicians per 100 000 population in secondary medical areas by clinical specialty**

| Year                                                        | 2000  | 2002  | 2004  | 2006  | 2008  | 2010  | 2012  | 2014  | 2000-2014<br>changes |
|-------------------------------------------------------------|-------|-------|-------|-------|-------|-------|-------|-------|----------------------|
| Number of physicians per 100 000 population                 |       |       |       |       |       |       |       |       |                      |
| All physicians                                              | 0.195 | 0.193 | 0.194 | 0.194 | 0.199 | 0.202 | 0.205 | 0.206 | 0.011                |
| Internists                                                  | 0.183 | 0.179 | 0.177 | 0.175 | 0.177 | 0.179 | 0.183 | 0.181 | -0.002               |
| Surgeons                                                    | 0.204 | 0.202 | 0.197 | 0.190 | 0.194 | 0.206 | 0.210 | 0.209 | 0.005                |
| Orthopedists                                                | 0.202 | 0.201 | 0.196 | 0.191 | 0.195 | 0.193 | 0.192 | 0.196 | -0.006               |
| OB/GYN specialists (per<br>female population)               | 0.226 | 0.218 | 0.226 | 0.240 | 0.260 | 0.263 | 0.266 | 0.270 | 0.043                |
| OB/GYN specialists (per<br>number of births) *              | 0.231 | 0.220 | 0.227 | 0.225 | 0.243 | 0.243 | 0.248 | 0.250 | 0.019                |
| Pediatricians (per<br>pediatric population)                 | 0.248 | 0.244 | 0.239 | 0.243 | 0.246 | 0.244 | 0.247 | 0.246 | -0.003               |
| Anesthesiologists                                           | 0.445 | 0.435 | 0.438 | 0.433 | 0.434 | 0.428 | 0.432 | 0.429 | -0.016               |
| Number of physicians per 100 000 demand-adjusted population |       |       |       |       |       |       |       |       |                      |
| All physicians                                              | 0.212 | 0.210 | 0.214 | 0.219 | 0.227 | 0.231 | 0.234 | 0.237 | 0.025                |
| Internists                                                  | 0.186 | 0.182 | 0.185 | 0.184 | 0.191 | 0.194 | 0.199 | 0.199 | 0.013                |
| Surgeons                                                    | 0.204 | 0.202 | 0.198 | 0.189 | 0.199 | 0.213 | 0.218 | 0.219 | 0.015                |
| Orthopedists                                                | 0.215 | 0.212 | 0.208 | 0.204 | 0.211 | 0.211 | 0.210 | 0.213 | -0.002               |
| OB/GYN specialists (per<br>female population)               | 0.254 | 0.247 | 0.255 | 0.272 | 0.292 | 0.296 | 0.299 | 0.303 | 0.049                |
| Pediatricians (per<br>pediatric population)                 | 0.244 | 0.240 | 0.235 | 0.240 | 0.243 | 0.240 | 0.243 | 0.242 | -0.002               |
| Anesthesiologists                                           | 0.456 | 0.447 | 0.451 | 0.448 | 0.449 | 0.445 | 0.450 | 0.447 | -0.009               |

\* As the number of births was not adjusted for healthcare demand, the numbers of OB/GYN specialists per 100 000 demand-adjusted births are not shown.

1  
2 OB/GYN: obstetrics/gynecology  
3  
4  
5  
6  
7  
8  
9  
10  
11  
12  
13  
14  
15  
16  
17  
18  
19  
20  
21  
22  
23  
24  
25  
26  
27  
28  
29  
30  
31  
32  
33  
34  
35  
36  
37  
38  
39  
40  
41  
42  
43  
44  
45  
46  
47

For peer review only

**Table 4 Descriptive statistics of the number of physicians per 100 000 population in the four groups of secondary medical areas in 2000 and 2014**

|                                                            | Before adjustment |                | After adjustment |               |
|------------------------------------------------------------|-------------------|----------------|------------------|---------------|
|                                                            | 2000              | 2014           | 2000             | 2014          |
| Total number of physicians per 100 000 population          |                   |                |                  |               |
| Group 1                                                    | 247.0             | 297.9 (20.6%)  | 311.6            | 305.7 (-1.9%) |
| Group 2                                                    | 194.8             | 226.6 (16.3%)  | 213.9            | 203.3 (-5.0%) |
| Group 3                                                    | 124.6             | 142.1 (14.0%)  | 138.9            | 127.0 (-8.6%) |
| Group 4                                                    | 126.3             | 163.1 (29.1%)  | 166.9            | 171.9 (3.0%)  |
| Number of internists per 100 000 population                |                   |                |                  |               |
| Group 1                                                    | 95.2              | 108.0 (13.4%)  | 120.1            | 110.8 (-7.7%) |
| Group 2                                                    | 79.8              | 87.5 (9.6%)    | 87.6             | 78.5 (-10.4%) |
| Group 3                                                    | 54.0              | 59.1 (9.4%)    | 60.2             | 52.8 (-12.3%) |
| Group 4                                                    | 49.6              | 61.4 (23.8%)   | 65.5             | 64.7 (-1.2%)  |
| Number of surgeons per 100 000 population                  |                   |                |                  |               |
| Group 1                                                    | 25.2              | 22.6 (-10.3%)  | 31.8             | 23.2 (-27.0%) |
| Group 2                                                    | 21.8              | 19.3 (-11.5%)  | 24.0             | 17.3 (-27.9%) |
| Group 3                                                    | 15.3              | 13.3 (-13.1%)  | 17.1             | 11.9 (-30.4%) |
| Group 4                                                    | 12.9              | 12.7 (-1.6%)   | 17.0             | 13.3 (-21.8%) |
| Number of orthopedists per 100 000 population              |                   |                |                  |               |
| Group 1                                                    | 18.6              | 22.4 (20.4%)   | 23.5             | 23.0 (-2.1%)  |
| Group 2                                                    | 16.6              | 19.2 (15.7%)   | 18.2             | 17.2 (-5.5%)  |
| Group 3                                                    | 10.8              | 12.6 (16.7%)   | 12.0             | 11.2 (-6.7%)  |
| Group 4                                                    | 10.7              | 13.4 (25.2%)   | 14.2             | 14.2 (0.0%)   |
| Number of OB/GYN specialists per 100 000 female population |                   |                |                  |               |
| Group 1                                                    | 28.4              | 28.9 (1.8%)    | 33.2             | 27.5 (-17.2%) |
| Group 2                                                    | 20.2              | 19.3 (-4.5%)   | 20.3             | 15.8 (-22.2%) |
| Group 3                                                    | 13.9              | 12.4 (-10.8%)  | 14.1             | 10.2 (-27.7%) |
| Group 4                                                    | 16.3              | 17.0 (4.3%)    | 20.0             | 16.7 (-16.5%) |
| Number of OB/GYN specialists per 100 000 births *          |                   |                |                  |               |
| Group 1                                                    | 1316.5            | 1578.9 (19.9%) | N/A              | N/A           |
| Group 2                                                    | 1051.3            | 1240.3 (18.0%) | N/A              | N/A           |
| Group 3                                                    | 714.9             | 849.8 (18.9%)  | N/A              | N/A           |
| Group 4                                                    | 702.1             | 914.7 (30.3%)  | N/A              | N/A           |
| Number of pediatricians per 100 000 pediatric population   |                   |                |                  |               |



|                                                    |      |              |       |               |
|----------------------------------------------------|------|--------------|-------|---------------|
| Group 1                                            | 49.0 | 63.1 (28.8%) | 211.5 | 272.3 (28.7%) |
| Group 2                                            | 35.5 | 50.2 (41.4%) | 158.0 | 221.0 (39.9%) |
| Group 3                                            | 22.6 | 32.7 (44.7%) | 100.7 | 144.8 (43.8%) |
| Group 4                                            | 27.3 | 36.7 (34.4%) | 117.6 | 159.4 (35.5%) |
| Number of anesthesiologists per 100 000 population |      |              |       |               |
| Group 1                                            | 6.6  | 9.4 (42.4%)  | 8.3   | 9.7 (16.9%)   |
| Group 2                                            | 4.4  | 6.1 (38.6%)  | 4.8   | 5.5 (14.6%)   |
| Group 3                                            | 1.9  | 2.8 (47.4%)  | 2.1   | 2.5 (19.0%)   |
| Group 4                                            | 2.2  | 4.1 (86.4%)  | 2.9   | 4.3 (48.3%)   |

Group 1: urban areas with higher initial physician supply; Group 2: rural areas with higher initial physician supply; Group 3: rural areas with lower initial physician supply; Group 4: urban areas with lower initial physician supply.

\* As the number of births was not adjusted for healthcare demand, the numbers of OB/GYN specialists per 100 000 demand-adjusted births are not shown.

N/A: not applicable; OB/GYN: obstetrics/gynecology

The parenthesis represents the percentage of increase/decrease between 2000 and 2014.

Figure 1

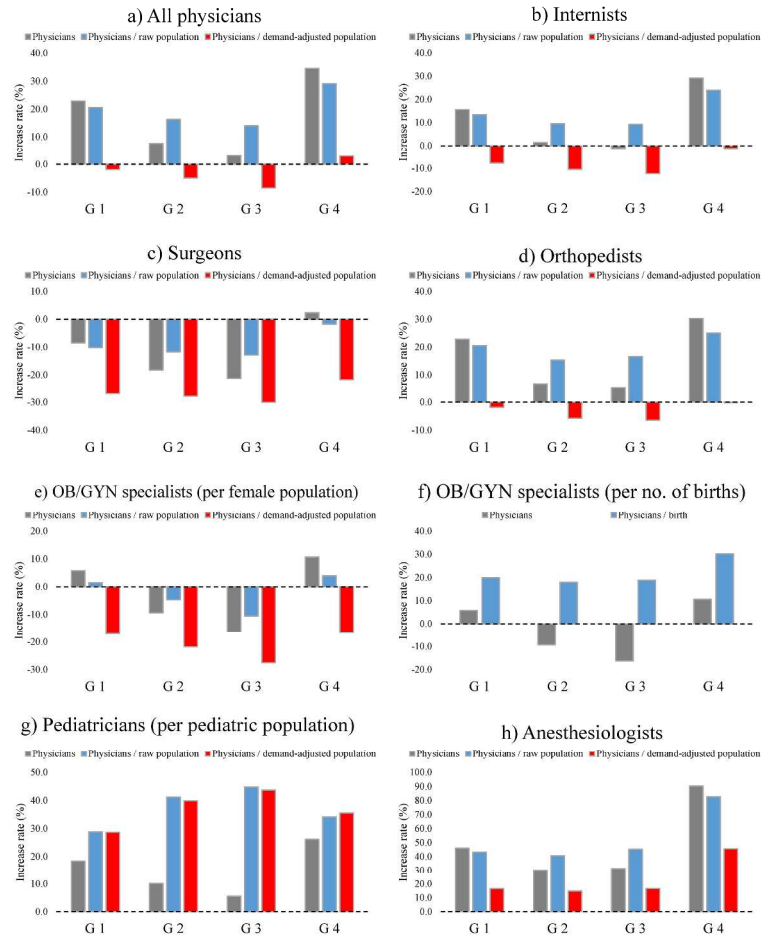

Group 1 (G1): urban areas with higher initial physician supply; Group 2 (G2): rural areas with higher initial physician supply; Group 3 (G3): rural areas with lower initial physician supply; Group 4 (G4): urban areas with lower initial physician supply. \* As the number of births was not adjusted for healthcare demand, the numbers of OB/GYN specialists per 100 000 demand-adjusted births are not shown. OB/GYN: obstetrics/gynecology

297x420mm (300 x 300 DPI)

**Appendix table. Descriptive statistics of the four groups of secondary medical areas in 2000**

| Urban / Rural<br>Group     | Urban                |                      | Rural                |                      |
|----------------------------|----------------------|----------------------|----------------------|----------------------|
|                            | Group 1              | Group 4              | Group 2              | Group 3              |
|                            | Mean(SD)             | Mean(SD)             | Mean(SD)             | Mean(SD)             |
| Number of physicians       |                      |                      |                      |                      |
| Total physicians           | 1 536.0(1 409.7)     | 619.2(433.5)         | 352.0(295.3)         | 175.5(127.2)         |
| Internists                 | 592.0(566.4)         | 242.9(165.3)         | 144.3(105.2)         | 76.1(52.0)           |
| Surgeons                   | 156.5(142.1)         | 63.1(42.2)           | 39.5(28.4)           | 21.6(14.2)           |
| Orthopedists               | 115.8(94.4)          | 52.6(36.4)           | 30.0(25.9)           | 15.2(12.2)           |
| OB/GYN specialists         | 78.1(71.8)           | 34.1(26.3)           | 16.4(15.6)           | 8.6(6.5)             |
| Pediatricians              | 88.0(71.9)           | 40.3(31)             | 19.1(19.8)           | 9.6(7.8)             |
| Anesthesiologists          | 40.9(40.1)           | 10.9(9.8)            | 7.9(9.8)             | 2.7(3.2)             |
| Raw population             |                      |                      |                      |                      |
| Total population           | 621 865.5(458 098.5) | 490 244.5(341 301.8) | 180 718.5(125 140.5) | 140 925.7(100 156.8) |
| Female population          | 274 615.3(203 154.4) | 209 062.4(144 107.6) | 81 044.7(54 965.4)   | 62 047.6(43 331.9)   |
| Pediatric population       | 89 778.6(62 866.3)   | 73 620.8(48 171.0)   | 26 837.6(19 441.3)   | 21 202.8(15 429.6)   |
| Number of births *         | 41 599.4(29 459.0)   | 34 246.1(22 935.5)   | 12 070.9(8 837.2)    | 9 497.2(6 971.3)     |
| Demand-adjusted population |                      |                      |                      |                      |
| Total population           | 492 971.0(349 667.3) | 370 991.2(242 817.0) | 164 585.9(103 001.3) | 126 410.8(84 059.2)  |
| Female population          | 235 594.4(166 553.3) | 170 624.5(109 441.9) | 80 861.9(49 177.2)   | 61 184.3(39 965.6)   |
| Pediatric population       | 41 599.4(29 459.0)   | 34 246.1(22 935.5)   | 12 070.9(8 837.2)    | 9 497.2(6 971.3)     |

1  
2  
3  
4  
5  
6  
7  
8  
9  
10  
11  
12  
13  
14  
15  
16  
17  
18  
19  
20  
21  
22  
23  
24  
25  
26  
27  
28  
29  
30  
31  
32  
33  
34  
35  
36  
37  
38  
39  
40  
41  
42  
43  
44  
45  
46

|                                           |                  |                  |              |              |
|-------------------------------------------|------------------|------------------|--------------|--------------|
| Area (km <sup>2</sup> )                   | 311.5(221.5)     | 242.8(141.4)     | 360.9(238.5) | 458.6(485.8) |
| Population density (per km <sup>2</sup> ) | 3 023.7(3 403.4) | 2 591.6(2 510.6) | 514.5(140.9) | 393.5(186.9) |

Group 1 and Group 2: Higher initial physician supply, Group 3 and Group 4: Lower initial physician supply.

\* The number of births was not adjusted for healthcare demand.

OB/GYN: obstetrics/gynecology; SD: standard deviation

For peer review only

Appendix Figure.

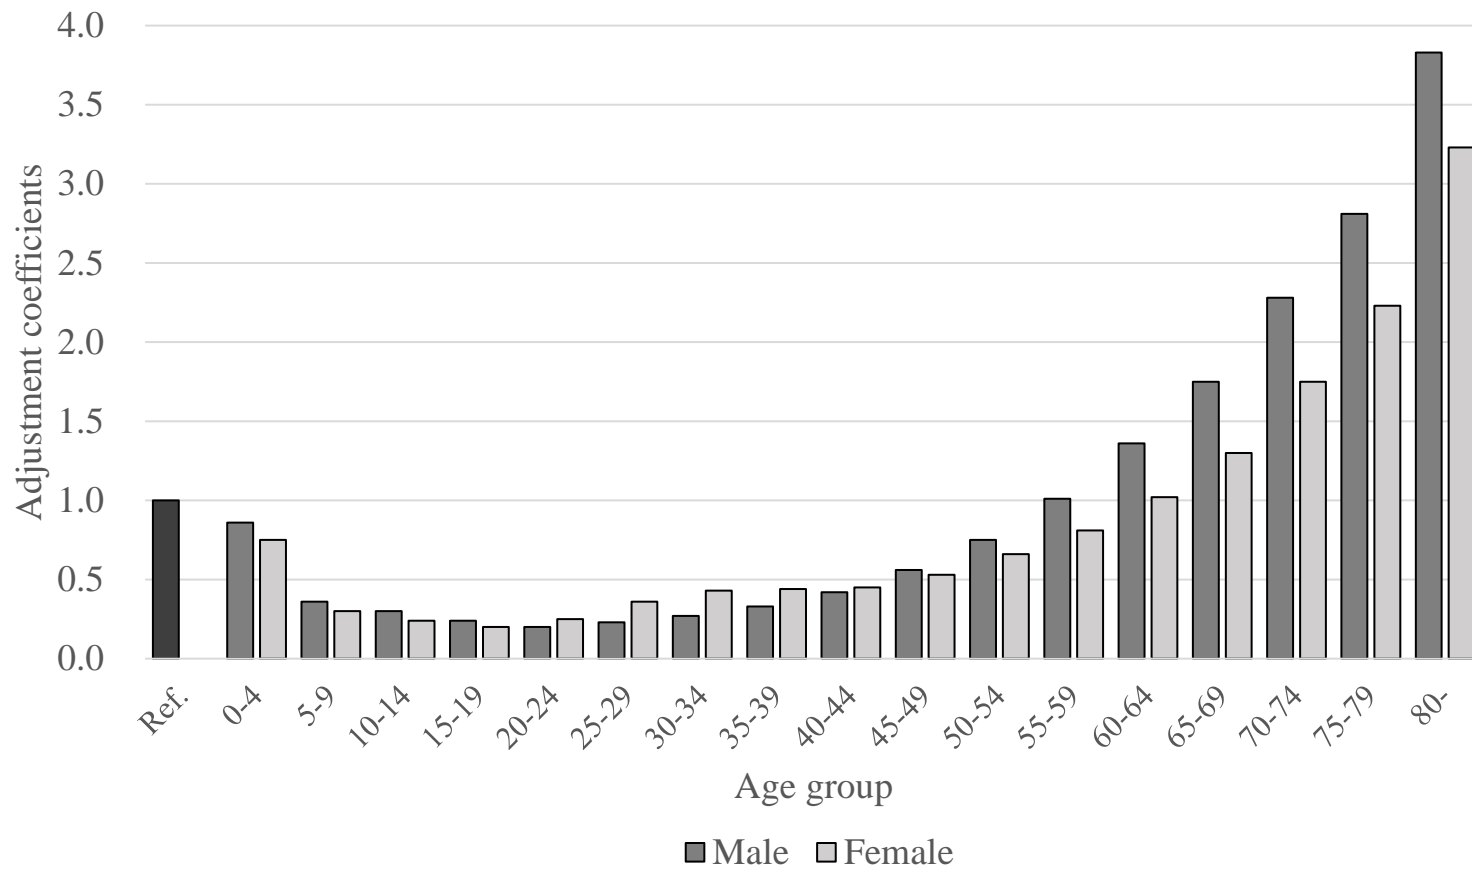

## STROBE Statement—checklist of items that should be included in reports of observational studies

|                              | Item No | Recommendation                                                                                                                                                                                                                                                                                                                                                                                                                                                                                                                                                                                                                                                                                          |
|------------------------------|---------|---------------------------------------------------------------------------------------------------------------------------------------------------------------------------------------------------------------------------------------------------------------------------------------------------------------------------------------------------------------------------------------------------------------------------------------------------------------------------------------------------------------------------------------------------------------------------------------------------------------------------------------------------------------------------------------------------------|
| <b>Title and abstract</b>    | 1       | (a) Indicate the study's design with a commonly used term in the title or the abstract -p3<br>(b) Provide in the abstract an informative and balanced summary of what was done and what was found – p3-4                                                                                                                                                                                                                                                                                                                                                                                                                                                                                                |
| <b>Introduction</b>          |         |                                                                                                                                                                                                                                                                                                                                                                                                                                                                                                                                                                                                                                                                                                         |
| Background/rationale         | 2       | Explain the scientific background and rationale for the investigation being reported -p6-7                                                                                                                                                                                                                                                                                                                                                                                                                                                                                                                                                                                                              |
| Objectives                   | 3       | State specific objectives, including any prespecified hypotheses – p7                                                                                                                                                                                                                                                                                                                                                                                                                                                                                                                                                                                                                                   |
| <b>Methods</b>               |         |                                                                                                                                                                                                                                                                                                                                                                                                                                                                                                                                                                                                                                                                                                         |
| Study design                 | 4       | Present key elements of study design early in the paper – p10-12                                                                                                                                                                                                                                                                                                                                                                                                                                                                                                                                                                                                                                        |
| Setting                      | 5       | Describe the setting, locations, and relevant dates, including periods of recruitment, exposure, follow-up, and data collection –p8-9                                                                                                                                                                                                                                                                                                                                                                                                                                                                                                                                                                   |
| Participants                 | 6       | (a) <i>Cohort study</i> —Give the eligibility criteria, and the sources and methods of selection of participants. Describe methods of follow-up<br><i>Case-control study</i> —Give the eligibility criteria, and the sources and methods of case ascertainment and control selection. Give the rationale for the choice of cases and controls<br><i>Cross-sectional study</i> —Give the eligibility criteria, and the sources and methods of selection of participants – p8-9<br>(b) <i>Cohort study</i> —For matched studies, give matching criteria and number of exposed and unexposed<br><i>Case-control study</i> —For matched studies, give matching criteria and the number of controls per case |
| Variables                    | 7       | Clearly define all outcomes, exposures, predictors, potential confounders, and effect modifiers. Give diagnostic criteria, if applicable – p10                                                                                                                                                                                                                                                                                                                                                                                                                                                                                                                                                          |
| Data sources/<br>measurement | 8*      | For each variable of interest, give sources of data and details of methods of assessment (measurement). Describe comparability of assessment methods if there is more than one group –p7-8                                                                                                                                                                                                                                                                                                                                                                                                                                                                                                              |
| Bias                         | 9       | Describe any efforts to address potential sources of bias –p7-8                                                                                                                                                                                                                                                                                                                                                                                                                                                                                                                                                                                                                                         |
| Study size                   | 10      | Explain how the study size was arrived at – p7-9                                                                                                                                                                                                                                                                                                                                                                                                                                                                                                                                                                                                                                                        |
| Quantitative variables       | 11      | Explain how quantitative variables were handled in the analyses. If applicable, describe which groupings were chosen and why – p11                                                                                                                                                                                                                                                                                                                                                                                                                                                                                                                                                                      |
| Statistical methods          | 12      | (a) Describe all statistical methods, including those used to control for confounding –p10-12<br>(b) Describe any methods used to examine subgroups and interactions –p11-12<br>(c) Explain how missing data were addressed –p7-8<br>(d) <i>Cohort study</i> —If applicable, explain how loss to follow-up was addressed<br><i>Case-control study</i> —If applicable, explain how matching of cases and controls was addressed<br><i>Cross-sectional study</i> —If applicable, describe analytical methods taking account of sampling strategy –not applicable<br>(e) Describe any sensitivity analyses –p20                                                                                            |

Continued on next page

**Results**

|                  |     |                                                                                                                                                                                                                                                                                                                                                                                                                                                    |
|------------------|-----|----------------------------------------------------------------------------------------------------------------------------------------------------------------------------------------------------------------------------------------------------------------------------------------------------------------------------------------------------------------------------------------------------------------------------------------------------|
| Participants     | 13* | (a) Report numbers of individuals at each stage of study—eg numbers potentially eligible, examined for eligibility, confirmed eligible, included in the study, completing follow-up, and analysed—Table 1, Table 2, and Table 4<br>(b) Give reasons for non-participation at each stage—7-8<br>(c) Consider use of a flow diagram – no use                                                                                                         |
| Descriptive data | 14* | (a) Give characteristics of study participants (eg demographic, clinical, social) and information on exposures and potential confounders—p8-9<br>(b) Indicate number of participants with missing data for each variable of interest—p7-8<br>(c) <i>Cohort study</i> —Summarise follow-up time (eg, average and total amount)                                                                                                                      |
| Outcome data     | 15* | <i>Cohort study</i> —Report numbers of outcome events or summary measures over time<br><i>Case-control study</i> —Report numbers in each exposure category, or summary measures of exposure<br><i>Cross-sectional study</i> —Report numbers of outcome events or summary measures—p12-14                                                                                                                                                           |
| Main results     | 16  | (a) Give unadjusted estimates and, if applicable, confounder-adjusted estimates and their precision (eg, 95% confidence interval). Make clear which confounders were adjusted for and why they were included –not applicable<br>(b) Report category boundaries when continuous variables were categorized—p11<br>(c) If relevant, consider translating estimates of relative risk into absolute risk for a meaningful time period – not applicable |
| Other analyses   | 17  | Report other analyses done—eg analyses of subgroups and interactions, and sensitivity analyses—p13-14                                                                                                                                                                                                                                                                                                                                              |

**Discussion**

|                  |    |                                                                                                                                                                                   |
|------------------|----|-----------------------------------------------------------------------------------------------------------------------------------------------------------------------------------|
| Key results      | 18 | Summarise key results with reference to study objectives—p14-15                                                                                                                   |
| Limitations      | 19 | Discuss limitations of the study, taking into account sources of potential bias or imprecision. Discuss both direction and magnitude of any potential bias—p20                    |
| Interpretation   | 20 | Give a cautious overall interpretation of results considering objectives, limitations, multiplicity of analyses, results from similar studies, and other relevant evidence—p15-20 |
| Generalisability | 21 | Discuss the generalisability (external validity) of the study results—p20                                                                                                         |

**Other information**

|         |    |                                                                                                                                                                      |
|---------|----|----------------------------------------------------------------------------------------------------------------------------------------------------------------------|
| Funding | 22 | Give the source of funding and the role of the funders for the present study and, if applicable, for the original study on which the present article is based—p22-23 |
|---------|----|----------------------------------------------------------------------------------------------------------------------------------------------------------------------|

\*Give information separately for cases and controls in case-control studies and, if applicable, for exposed and unexposed groups in cohort and cross-sectional studies.

**Note:** An Explanation and Elaboration article discusses each checklist item and gives methodological background and published examples of transparent reporting. The STROBE checklist is best used in conjunction with this article (freely available on the Web sites of PLoS Medicine at <http://www.plosmedicine.org/>, Annals of Internal Medicine at <http://www.annals.org/>, and Epidemiology at <http://www.epidem.com/>). Information on the STROBE Initiative is available at [www.strobe-statement.org](http://www.strobe-statement.org).

# BMJ Open

## Examining changes in the equity of physician distribution in Japan: a specialty-specific longitudinal study

|                                 |                                                                                                                                                                                                                                                                                                                                                                                         |
|---------------------------------|-----------------------------------------------------------------------------------------------------------------------------------------------------------------------------------------------------------------------------------------------------------------------------------------------------------------------------------------------------------------------------------------|
| Journal:                        | <i>BMJ Open</i>                                                                                                                                                                                                                                                                                                                                                                         |
| Manuscript ID                   | bmjopen-2017-018538.R2                                                                                                                                                                                                                                                                                                                                                                  |
| Article Type:                   | Research                                                                                                                                                                                                                                                                                                                                                                                |
| Date Submitted by the Author:   | 06-Nov-2017                                                                                                                                                                                                                                                                                                                                                                             |
| Complete List of Authors:       | Hara, Koji; Kyoto University, Department of Healthcare Economics and Quality Management<br>Kunisawa, Susumu; Kyoto University, Department of Healthcare Economics and Quality Management<br>Sasaki, Noriko; Kyoto University, Department of Healthcare Economics and Quality Management<br>Imanaka, Yuichi; Kyoto University, Department of Healthcare Economics and Quality Management |
| <b>Primary Subject Heading</b>: | Health policy                                                                                                                                                                                                                                                                                                                                                                           |
| Secondary Subject Heading:      | Public health                                                                                                                                                                                                                                                                                                                                                                           |
| Keywords:                       | Inequity, Aging, Physician, Japan                                                                                                                                                                                                                                                                                                                                                       |
|                                 |                                                                                                                                                                                                                                                                                                                                                                                         |

SCHOLARONE™  
Manuscripts

Peer Review Only



1 Examining changes in the equity of physician distribution in  
2 Japan: a specialty-specific longitudinal study

3  
4 **Authors:**

5 Koji Hara MA, Susumu Kunisawa, PhD, Noriko Sasaki, PhD, and Yuichi Imanaka, PhD  
6 Department of Healthcare Economics and Quality Management, Graduate School of  
7 Medicine, Kyoto University; Yoshida Konoe-cho, Sakyo-ku, Kyoto City, Kyoto, Japan  
8 606-8501

9  
10 **Corresponding author:**

11 Yuichi Imanaka, Professor

12 Mailing address: Department of Healthcare Economics and Quality Management,  
13 Graduate School of Medicine, Kyoto University; Yoshida Konoe-cho, Sakyo-ku, Kyoto  
14 City, Kyoto, Japan 606-8501

15 Tel: +81 75 753 4454

16 Fax: +81 75 753 4455

17 Email: imanaka-y@umin.net

18

1  
2  
3  
4  
5  
6 19 **Word count:**  
7

8  
9 20 3 625 words  
10

11 21  
12  
13  
14  
15  
16  
17  
18  
19  
20  
21  
22  
23  
24  
25  
26  
27  
28  
29  
30  
31  
32  
33  
34  
35  
36  
37  
38  
39  
40  
41  
42  
43  
44  
45  
46  
47  
48  
49  
50  
51  
52  
53  
54  
55  
56  
57  
58  
59  
60

For peer review only

1  
2  
3  
4  
5  
6 22 Examining changes in the equity of physician distribution in  
7  
8  
9 23 Japan: a specialty-specific longitudinal study  
10  
11  
12 24

13  
14  
15 25 **Abstract**

16  
17 26 **Objectives**

18  
19  
20 27 In this longitudinal study, we examined changes in the geographic distribution of physicians in Japan  
21  
22  
23 28 from 2000 to 2014 by clinical specialty with adjustments for healthcare demand based on population  
24  
25  
26 29 structure.

27  
28  
29 30 **Methods**

30  
31 31 The Japanese population was adjusted for healthcare demand using health expenditure per capita  
32  
33  
34 32 stratified by age and sex. The numbers of physicians per 100 000 demand-adjusted population  
35  
36  
37 33 (DAP) in 2000 and 2014 were calculated for sub-prefectural regions known as secondary medical  
38  
39  
40 34 areas. Disparities in the geographic distribution of physicians for each specialty were assessed using  
41  
42  
43 35 Gini coefficients. A subgroup analysis was conducted by dividing the regions into four groups  
44  
45  
46 36 according to urban-rural classification and initial physician supply.  
47

48  
49 37 **Results**

50  
51 38 Over the study period, the number of physicians per 100 000 DAP decreased in all specialties  
52  
53  
54 39 assessed (internal medicine: -6·9%, surgery: -26·0%, orthopedics: -2·1%, obstetrics/gynecology [per  
55  
56  
57

1  
2  
3  
4  
5  
6 40 female population]: -17.5%) except pediatrics (+33.3%) and anesthesiology (+21.1%). No  
7  
8  
9 41 reductions in geographic disparity were observed in any of the specialties assessed. Geographic  
10  
11 42 disparity increased substantially in internal medicine, surgery, and obstetrics and gynecology. Rural  
12  
13  
14 43 areas with lower initial physician supply experienced the highest decreases in physicians per 100 000  
15  
16  
17 44 DAP for all specialties assessed except pediatrics and anesthesiology. In contrast, urban areas with  
18  
19  
20 45 lower initial physician supply experienced the lowest decreases in physicians per 100 000 DAP in  
21  
22  
23 46 internal medicine, surgery, orthopedics, and obstetrics and gynecology, but the highest increase in  
24  
25  
26 47 anesthesiology.

#### 28 **Conclusion**

29  
30  
31 49 Between 2000 and 2014, the number of physicians per 100 000 DAP in Japan decreased in all  
32  
33  
34 50 specialties assessed except pediatrics and anesthesiology. There is also a growing urban-rural  
35  
36  
37 51 disparity in physician supply in all specialties assessed except pediatrics. Additional measures may  
38  
39  
40 52 be needed to resolve these issues and improve physician distribution in Japan.  
41  
42 53

1  
2  
3  
4  
5  
6 54 **Article Summary**  
7

8  
9 55 Strengths and limitations of this study  
10

- 11 56 • This study longitudinally examined specialty-specific changes in the geographic distribution of  
12  
13  
14 57 Japanese physicians with adjustments for healthcare demand according to population structure.  
15  
16  
17 58 • The adjustment method used in this study was previously verified, and enables adjustment for  
18  
19  
20 59 healthcare demand according to age strata using health expenditure per capita.  
21  
22  
23 60 • Both age and sex were included in the calculation of the adjustment coefficients to increase the  
24  
25  
26 61 accuracy of adjustments.  
27  
28  
29 62 • There was a lack of information on the physicians' working conditions, such as whether a  
30  
31  
32 63 physician worked full-time or part-time.  
33  
34  
35 64 • It is difficult to generalize our adjustment coefficients to other countries as they were calculated  
36  
37 65 using Japanese health expenditure, but the adjustment method itself may have applications in  
38  
39  
40 66 other countries.  
41  
42 67

## 68 **Introduction**

69 The presence of inequities in the geographic distribution of physicians is a major social problem in  
70 many countries.<sup>1-4</sup> In Japan, the geographic disparity in physician supply has long been recognized  
71 as a serious flaw in the healthcare provision system.<sup>5 6</sup> The lack of regulations that dictate where  
72 individual physicians work in Japan has led to the concentration of physicians in urban regions and a  
73 shortfall in rural areas, thereby resulting in uneven access to health care throughout the country.<sup>5 6</sup>  
74 On the other hand, Japan has entered a period of population decline,<sup>7</sup> and an oversupply of  
75 physicians is imminent if their numbers continue to rise at current rates. Attempts to control the total  
76 number of physicians have been met with resistance from various interest groups.<sup>8</sup>

77 In addition to the geographic disparity in physician supply, Japan also faces issues  
78 stemming from an uneven distribution of physicians among the clinical specialties.<sup>9</sup> Previous studies  
79 from the US have reported that the geographic distribution of physicians varies according to clinical  
80 specialty.<sup>10 11</sup> Similarly, geographic disparities in the number of physicians in pediatrics, obstetrics  
81 and gynecology (OB/GYN), and anesthesiology have been documented in Japan.<sup>12</sup> However, few  
82 studies have longitudinally examined the geographic distribution of physicians according to clinical  
83 specialty.

84 Although the number of physicians per 100 000 population is generally used as an  
85 indicator when examining geographic disparities in physician supply, this measure involves a simple

1  
2  
3  
4  
5  
6 86 head count that does not account for the inherent variations in healthcare demand among the  
7  
8  
9 87 different age strata and sex.<sup>4</sup> Furthermore, Japan's population is aging at an unprecedented rate,  
10  
11 88 which has resulted in its transformation into the world's first "super-aged" society (where more than  
12  
13  
14 89 21% of a country's population is aged 65 years and older). As a consequence, the population  
15  
16  
17 90 structure in Japan is undergoing dramatic changes, which has invariably led to changes to healthcare  
18  
19  
20 91 demand. We previously reported that Japan's healthcare demand increased by 22% from 2000 to  
21  
22  
23 92 2014 amid worsening geographic disparity in physician supply.<sup>13</sup> However, studies have yet to be  
24  
25  
26 93 conducted on the disparity in Japan's physician supply for different clinical specialties while  
27  
28  
29 94 accounting for the differences in healthcare demand.

30  
31 95 This study aimed to longitudinally examine specialty-specific changes in the geographic  
32  
33  
34 96 distribution of physicians in Japan from 2000 to 2014 with adjustments for healthcare demand based  
35  
36  
37 97 on population structure.

38  
39  
40 98

## 41 42 99 **Methods**

### 43 44 45 100 **Data source**

46  
47  
48 101 Data on the number of physicians were obtained from the Survey of Physicians, Dentists, and

49  
50  
51 102 Pharmacists conducted every two years by the Ministry of Health, Labour and Welfare (MHLW).

52  
53  
54 103 Physicians in Japan are required to participate in this survey, which includes information on each

1  
2  
3  
4  
5  
6 104 physician's specialty and the type and location (municipality) of their workplace. Population data  
7  
8  
9 105 (age, sex, and location of residence) were extracted from the Annual Report of the National Basic  
10  
11 106 Resident Registration System published by the Ministry of Internal Affairs and Communications,  
12  
13  
14 107 and data on the number of births were obtained from the Annual Report of Vital Statistics published  
15  
16  
17 108 by the MHLW. We also acquired data on national health expenditure per capita according to patient  
18  
19  
20 109 age in 2013 from the MHLW. The total area of habitable land was ascertained from statistical reports  
21  
22  
23 110 on land areas of prefectures and municipalities by the Geospatial Information Authority of Japan.  
24  
25  
26 111  
27  
28 112 Physicians and population  
29  
30  
31 113 We targeted physicians working in clinical facilities (hospitals and clinics), and excluded physicians  
32  
33  
34 114 working in non-clinical facilities (e.g., research centers and government offices). The following  
35  
36  
37 115 clinical specialties were included in analysis: internal medicine, surgery, orthopedics, OB/GYN,  
38  
39  
40 116 pediatrics, and anesthesiology. Internal medicine, surgery, and orthopedics were selected because  
41  
42  
43 117 these departments generally have more physicians than other departments. The remaining three  
44  
45  
46 118 specialties were selected because of their previously reported geographic disparities in physician  
47  
48 119 supply throughout Japan.<sup>12</sup>  
49  
50

51 120 In addition to the total population, we also analyzed the female population, pediatric  
52  
53  
54 121 population (<15 years of age), and the number of births. With the exception of the number of births,  
55  
56  
57  
58  
59  
60



1  
2  
3  
4  
5  
6 122 all study populations were adjusted for healthcare demand. We calculated the number of OB/GYN  
7  
8  
9 123 specialists per 100 000 female population and per 100 000 births, the number of pediatricians per  
10  
11  
12 124 100 000 pediatric population, and the number of physicians per 100 000 population for each of the  
13  
14 125 other clinical specialties.

16  
17 126  
18  
19  
20 127 Geographic unit

21  
22  
23 128 The geographic unit of analysis was the secondary medical area (SMA). The Japanese government  
24  
25  
26 129 has designated three regional levels of healthcare provision. Primary medical areas are geographic  
27  
28  
29 130 units where primary care is provided, and are demarcated by municipal borders. Tertiary medical  
30  
31  
32 131 areas are geographic units that provide advanced medical care, and are demarcated by prefectural  
33  
34  
35 132 borders. SMAs are set between primary and tertiary medical areas, and are regions where general  
36  
37  
38 133 medical care (such as inpatient care) is provided; these areas are composed of multiple  
39  
40  
41 134 municipalities. Each prefectural government stipulates the geographic and demographic range of the  
42  
43  
44 135 SMAs within their prefecture. As a result, the boundaries of each SMA can be altered in response to  
45  
46  
47 136 changes in healthcare demand. SMAs have been previously used to examine the inequities in  
48  
49  
50 137 physician supply in Japan.<sup>6 14</sup> Because the number of SMAs varies slightly over time, this study was  
51  
52  
53 138 conducted using the 349 SMAs designated in 2012.

54 139  
55  
56  
57  
58  
59  
60

1  
2  
3  
4  
5  
6 140 Analytical methods  
7

8  
9 141 This retrospective study longitudinally examined the changes in the geographic distribution of the  
10  
11 142 number of physicians by clinical specialty among Japan's SMAs from 2000 to 2014. The primary  
12  
13  
14 143 outcomes were the overall number of physicians per 100,000 population and the trends in Gini  
15  
16  
17 144 coefficients (indicating geographic disparity) for each specialty during the study period. The  
18  
19  
20 145 secondary outcomes were the changes in physician numbers during the same period for subgroups  
21  
22  
23 146 that were categorized according to regional characteristics (urban-rural classification and initial  
24  
25  
26 147 physician supply).

27  
28 148 The population was first adjusted using adjustment coefficients of healthcare demand,  
29  
30  
31 149 which were calculated based on the health expenditure per capita stratified by age and sex through a  
32  
33  
34 150 previously described method.<sup>13</sup> Health expenditure per capita is likely indicative of the general  
35  
36  
37 151 workload of healthcare providers.<sup>15</sup> These expenditures include those for both inpatient and  
38  
39  
40 152 outpatient services, and account for variations in patient health status.<sup>13</sup> The demand-adjusted  
41  
42  
43 153 population was generated by multiplying the raw population with the adjustment coefficients.

44  
45 154 Next, geographic disparity was assessed using the Gini coefficient. This indicator, which is  
46  
47  
48 155 widely used to examine disparity in the field of economics, has been applied to analyze geographic  
49  
50  
51 156 disparity in physician supply.<sup>15 16-18</sup> We calculated the Gini coefficients for each specialty every two  
52  
53  
54 157 years from 2000 to 2014. The coefficients, which take a value from 0 (indicating complete equality)

1  
2  
3  
4  
5  
6 158 to 1 (indicating complete inequality), measure departure from a uniform distribution by drawing  
7  
8  
9 159 Lorenz curves.<sup>17</sup> If the curves of two time points intersect, conclusions cannot be made as to whether  
10  
11 160 or not the inequity of distribution is increasing.<sup>18</sup> Thus, we plotted two Lorenz curves (one each for  
12  
13  
14 161 2000 and 2014) for each clinical specialty.

15  
16  
17 162 Finally, a subgroup analysis was conducted by dividing SMAs into groups according to  
18  
19  
20 163 two regional characteristics. Using the method described in Sasaki et al.,<sup>19</sup> we classified each SMA  
21  
22  
23 164 into one of four groups based on whether the SMA was an urban or rural area, and whether the SMA  
24  
25  
26 165 had a higher or lower initial physician supply in 2000. An SMA was designated an urban area (or a  
27  
28  
29 166 rural area) if its population density was higher (or lower) than the median value in all SMAs. The  
30  
31 167 population density of each SMA was calculated using the total area of habitable land and the  
32  
33  
34 168 population in 2000. Next, an SMA was designated as having a higher (or lower) initial physician  
35  
36  
37 169 supply if the number of physicians per 100 000 population was higher (or lower) than the median  
38  
39  
40 170 number of physicians per 100 000 population in all SMAs. The following four groups were  
41  
42  
43 171 analyzed: Group 1, which comprised urban areas with higher initial physician supply; Group 2,  
44  
45  
46 172 which comprised rural areas with higher initial physician supply; Group 3, which comprised rural  
47  
48  
49 173 areas with lower initial physician supply; and Group 4, which comprised urban areas with lower  
50  
51 174 initial physician supply. Data from 2000 were used for both the population and physicians. In this  
52  
53  
54 175 subgroup analysis, we compared the inter-group changes in the number of physicians per 100 000  
55  
56  
57  
58  
59  
60

1  
2  
3  
4  
5  
6 176 population between 2000 and 2014.  
7

8  
9 177 All analyses were performed using R statistical software (V.3.2.2).  
10

11  
12 178

13  
14 179 **Results**  
15

16  
17 180 Table 1 shows the population sizes of the total population, female population, and pediatric  
18  
19 181 population before and after applying the adjustment coefficients in 2000 and 2014. The adjustment  
20  
21 182 coefficients for the different age strata and sex are provided Appendix Figure. Before adjustment, the  
22  
23 183 total population did not substantially change throughout the study period. In contrast, the  
24  
25 184 demand-adjusted total population increased by 23·7% between 2000 and 2014. The number of births,  
26  
27 185 which was not adjusted for healthcare demand, decreased by 15·7%. The pediatric population  
28  
29 186 declined by 11·1% over the study period both before and after adjusting for healthcare demand.  
30  
31  
32  
33

34  
35  
36 187 Table 2 shows the overall number of physicians and the number of physicians per 100 000  
38  
39 188 population in 2000 and 2014. The overall number of all physicians increased by 22·1% over the  
40  
41 189 study period. Similarly, the number of all physicians per 100 000 population increased by 21·7%.

42  
43  
44 190 However, the number of all physicians per 100 000 demand-adjusted population decreased by 1·3%.

45  
46  
47 191 The number of physicians per 100,000 demand-adjusted population in surgery and OB/GYN

48  
49 192 declined by 26·0% and 17·5%, respectively. In contrast, the number of OB/GYN specialists per

50  
51 193 100,000 births increased by 23·1% due to the declining number of births. The number of physicians  
52  
53  
54  
55  
56  
57

1  
2  
3  
4  
5  
6 194 per 100,000 demand-adjusted population in pediatrics and anesthesiology increased by 33·3% and  
7  
8  
9 195 21·1%, respectively.

10  
11 196 Table 3 shows the trends in Gini coefficients for the number of physicians per 100 000  
12  
13  
14 197 population in the SMAs by clinical specialty. There were no substantial changes in the Gini  
15  
16  
17 198 coefficients for the numbers of orthopedists, pediatricians, and anesthesiologists per 100 000  
18  
19  
20 199 demand-adjusted population. However, inequity increased in the geographic distribution of internists,  
21  
22  
23 200 surgeons, and OB/GYN specialists (for both the female population and the number of births). In  
24  
25  
26 201 each of these three specialties, the Lorenz curve in 2014 tended to deteriorate more than the curve in  
27  
28  
29 202 2000 without intersection between the two curves (figures not shown). When comparing the Gini  
30  
31 203 coefficients before and after adjusting for healthcare demand, the trends in the coefficients were  
32  
33  
34 204 similar for each clinical specialty. However, the post-adjustment Gini coefficients for all clinical  
35  
36  
37 205 specialties (except for pediatrics) were higher than their pre-adjustment values.

38  
39  
40 206 Table 4 summarizes the changes in the numbers of physicians per 100 000 population in  
41  
42  
43 207 the four groups of SMAs. Detailed descriptive statistics of the four groups are provided in the  
44  
45  
46 208 Appendix table. Figure 1 shows the temporal increases (2000 to 2014) in the number of physicians  
47  
48  
49 209 by clinical specialty in each group of SMAs. The temporal increases in the number of internists and  
50  
51  
52 210 orthopedists were similar to those for all physicians. The overall number of surgeons decreased in all  
53  
54 211 groups except for Group 4, and the number of surgeons per 100 000 demand-adjusted population  
55  
56  
57  
58  
59  
60

1  
2  
3  
4  
5  
6 212 decreased by 20% to 30% in all groups. As shown in Table 4, the number of surgeons per 100 000  
7  
8  
9 213 demand-adjusted population in Group 3 (11·9) was approximately half of the corresponding number  
10  
11  
12 214 in Group 1 (23·2) in 2014. In all groups, the number of OB/GYN specialists per 100 000  
13  
14  
15 215 demand-adjusted female population decreased, but the number of OB/GYN specialists per 100 000  
16  
17  
18 216 births increased. The number of pediatricians per 100 000 demand-adjusted pediatric population  
19  
20  
21 217 increased more in the rural SMAs than in the urban SMAs. The number of anesthesiologists per 100  
22  
23 218 000 demand-adjusted population increased in all groups; in particular, the number in Group 4  
24  
25  
26 219 increased by more than twice that of the other groups. In all clinical specialties except pediatrics and  
27  
28  
29 220 anesthesiology, Group 3 had the highest decrease in the number of physicians per 100 000  
30  
31  
32 221 demand-adjusted population. The 2014-2000 difference and ratio of the number of physicians per  
33  
34  
35 222 100 000 demand-adjusted population between Groups 3 and 4 increased in all clinical specialties  
36  
37  
38 223 except pediatrics.

39  
40 224

## 41 42 225 **Discussion**

43  
44  
45 226 The four major findings of this study are as follows: First, the demand-adjusted population increased  
46  
47  
48 227 by 23·7% between 2000 and 2014, whereas the demand-adjusted pediatric population decreased by  
49  
50  
51 228 11·1%. Second, the number of physicians per 100 000 demand-adjusted population decreased in all  
52  
53  
54 229 clinical specialties except pediatrics and anesthesiology. The largest increase (33·3%) was observed

1  
2  
3  
4  
5  
6 230 in pediatrics. Third, the geographic disparity in the number of physicians per 100 000  
7  
8  
9 231 demand-adjusted population did not decline in all clinical specialties, and had in fact increased in  
10  
11 232 internal medicine, surgery, and OB/GYN. Fourth, rural areas with lower initial physician supply had  
12  
13  
14 233 the highest decrease in the number of physicians per 100 000 demand-adjusted population compared  
15  
16  
17 234 with other areas in all clinical specialties except pediatrics and anesthesiology. In contrast, urban  
18  
19  
20 235 areas with lower initial physician supply had the lowest decrease in internal medicine, surgery,  
21  
22  
23 236 orthopedics and OBG/GYN, but the highest increase in anesthesiology.

24  
25 237 The population used in this study was adjusted for healthcare demand among the different  
26  
27  
28 238 age strata and sex using a previously described method.<sup>13</sup> Although several studies have examined  
29  
30  
31 239 the demand-adjusted geographic disparity in physician supply,<sup>15,20</sup> there is currently no gold standard  
32  
33  
34 240 method for adjustment.<sup>20</sup> The method used in this study was previously verified,<sup>13</sup> and enables  
35  
36  
37 241 adjustment for healthcare demand according to age strata. In addition, the inclusion of sex in the  
38  
39  
40 242 calculation of the coefficients may increase the accuracy of adjustments.

41  
42 243 The number of physicians per 100 000 demand-adjusted population decreased in internal  
43  
44  
45 244 medicine, surgery, orthopedics, and OB/GYN (per female population). The decline in physician  
46  
47  
48 245 supply was particularly large in surgery and OB/GYN, which corroborates previously reported  
49  
50  
51 246 downward trends in the numbers of physicians in these specialties.<sup>12</sup> The distribution among  
52  
53  
54 247 specialties is affected by physician preference, experience, and environment. For example, the

1  
2  
3  
4  
5  
6 248 shortage of surgeons may be influenced by the long working hours, high risk of medical litigation,  
7  
8  
9 249 and low reward for surgical skill.<sup>21</sup> Previous research has also shown that an increase in female  
10  
11  
12 250 physicians has affected the distribution of specialties because they are more likely to choose  
13  
14  
15 251 OB/GYN and pediatrics instead of surgery.<sup>22 23</sup> In order to ensure a high number of both female and  
16  
17  
18 252 male physicians, we believe that improvements should be made to the working environment, such as  
19  
20  
21 253 a reduction in physician working hours by assigning more duties and responsibilities to  
22  
23  
24 254 non-physician health professionals.<sup>21</sup> On the other hand, there was a large increase in the number of  
25  
26  
27 255 anesthesiologists during the study period. Japan is experiencing an increasing need for  
28  
29  
30 256 anesthesiologists due to the rising number of surgeries conducted, the increasing complexity of  
31  
32  
33 257 surgery owing to advances in surgical techniques and the overall aging of patients, as well as the  
34  
35  
36 258 growing social expectations for safety in anesthesia.<sup>24</sup> The increase in anesthesiologists may have  
37  
38  
39 259 been influenced by the growing number of female physicians. The increase in female  
40  
41  
42 260 anesthesiologists from 26.7% to 37.6% during the study period is consistent with this possibility.  
43  
44  
45 261 On the other hand, the number of pediatricians per 100 000 demand-adjusted pediatric  
46  
47  
48 262 population and OB/GYN specialists per 100 000 births increased substantially due to a decline in the  
49  
50  
51 263 pediatrics population and the number of births. The rate of pediatric population decline is expected  
52  
53  
54 264 to eventually exceed the rate of total population decline.<sup>25</sup> It may therefore be more useful to ensure  
55  
56  
57 265 the optimal allocation of physicians instead of simply increasing their overall numbers.



1  
2  
3  
4  
5  
6 266 Based on the analysis of Gini coefficients, there were no reductions in geographic disparity  
7  
8  
9 267 in the number of physicians per 100 000 demand-adjusted population in all clinical specialties  
10  
11 268 between 2000 and 2014. In particular, the inequity in physician supply increased in internal medicine,  
12  
13  
14 269 surgery, and OB/GYN. The inequity in surgery and OB/GYN may have been influenced by the  
15  
16  
17 270 decrease or lack of increase in the overall number of physicians in these specialties. These findings  
18  
19  
20 271 suggest that the uneven distribution of physicians among the clinical specialties may exacerbate  
21  
22  
23 272 geographic disparities in physician supply. On the other hand, the number of internists increased at a  
24  
25  
26 273 rate that was comparable to the overall growth rate. The increase in geographic disparity may  
27  
28 274 therefore be related to an increasing tendency toward physician specialization in Japan.<sup>26</sup> Although  
29  
30  
31 275 the overall number of general internists decreased from 74 539 to 61 317 over the study period, there  
32  
33  
34 276 was actually an increase from 21 006 to 48 780 physicians in internal medicine subspecialties such  
35  
36  
37 277 as pulmonary, cardiovascular, and gastrointestinal medicine (data not shown). The geographic  
38  
39  
40 278 disparity in physician supply in these subspecialties is greater than the disparity in general  
41  
42  
43 279 internists.<sup>9</sup> As a supplementary analysis, we calculated the Gini coefficients for general internal  
44  
45  
46 280 medicine and its subspecialties from 2000 to 2014. The results confirmed that the coefficient in the  
47  
48  
49 281 internal medicine subspecialties was consistently more than twice that of general internal medicine  
50  
51 282 (General internal medicine: 0.173 in 2000 to 0.149 in 2014, Internal subspecialties: 0.386 in 2000 to  
52  
53  
54 283 0.390 in 2014).

1  
2  
3  
4  
5  
6 284 The rate of increase in the number of physicians per 100 000 demand-adjusted population  
7  
8  
9 285 in the urban areas was generally higher than in the rural areas. In all clinical specialties except  
10  
11 286 pediatrics, both the difference and ratio in the number of physicians per 100 000 demand-adjusted  
12  
13  
14 287 population between Group 3 and Group 4 in 2014 were larger than the corresponding values in 2000.  
15  
16  
17 288 This indicates that the urban-rural disparity in physician supply widened over the study period.  
18  
19  
20 289 Group 3 had the lowest initial physician supply, and these regions may be facing a serious physician  
21  
22  
23 290 shortage. This issue should be explored further, and there may be a need for major reforms to ensure  
24  
25  
26 291 adequate physician supply to rural areas. It may also be important to implement measures in rural  
27  
28  
29 292 areas to improve physician productivity, reduce non-essential workload, and implement  
30  
31  
32 293 technology-based systems such as telemedicine.  
33

34 294 Prior to 2004, the vast majority of medical graduates joined a clinical specialty department  
35  
36  
37 295 (known as an *Ikyoku*) at their university that secures employment for the new graduates. *Ikyoku*  
38  
39  
40 296 generally dispatch physicians to other affiliated hospitals that are often located in rural areas. In this  
41  
42  
43 297 way, the *Ikyoku* were partly responsible for preventing a shortage of physicians in rural areas. On the  
44  
45  
46 298 other hand, medical graduates did not receive mandatory clinical training under this system. As a  
47  
48  
49 299 result, few graduates were able to acquire a wide range of medical skills through comprehensive and  
50  
51  
52 300 systematic training.<sup>27</sup> In addition, training assessments were not adequately performed under the  
53  
54 301 *Ikyoku* system.<sup>27</sup> In order to improve the overall quality of clinical training throughout Japan, the  
55  
56  
57  
58  
59  
60

1  
2  
3  
4  
5  
6 302 MHLW mandated a standardized 2-year training program in 2004. Furthermore, there was a large  
7  
8  
9 303 increase in the number of non-university hospitals that medical graduates could attend as part of this  
10  
11 304 training program after 2004. As a consequence, the graduates, now able to choose their training  
12  
13  
14 305 hospital after graduation, were less likely to select a university hospital for training. Due to the  
15  
16  
17 306 decreasing number of member physicians, it became more difficult for the *Ikyoku* to dispatch  
18  
19  
20 307 physicians to affiliate hospitals.<sup>14</sup> Previous studies have also reported that the new program may  
21  
22  
23 308 have increased the inequity in the geographic distribution of physicians<sup>14,28</sup>. Similarly, this new  
24  
25  
26 309 program may also have contributed to the lack of reduction in geographic disparity in this study.

27  
28  
29 310 The Japanese government has implemented several measures at the prefectural level aimed  
30  
31 311 at reducing the geographic disparity in physician supply. In 2006, a "Council for Regional Medicine"  
32  
33  
34 312 was established in each prefecture, and these councils include representatives of the prefectural and  
35  
36  
37 313 local governments, hospitals, medical associations, universities, and residents. The councils discuss  
38  
39  
40 314 detailed measures for securing medical staff with a variety of hospitals, including university  
41  
42  
43 315 hospitals and public hospitals. Furthermore, a "Support Center for Community Medicine" was  
44  
45  
46 316 established in each prefecture in 2011 to secure and retain physicians. These centers adopt the role of  
47  
48  
49 317 "control towers" to address the uneven distribution of physicians within each prefecture. Specifically,  
50  
51  
52 318 the centers are responsible for supporting career advancement for physicians working in rural areas,  
53  
54 319 acting as general liaisons for engaging new physicians, and providing general work information. In  
55  
56  
57  
58  
59  
60

1  
2  
3  
4  
5  
6 320 addition, the government has raised the regional quota of medical school admissions from 64  
7  
8  
9 321 students in 2005 to 1 617 students in 2016. The students are obligated to work in a rural area or a  
10  
11 322 designated specialty (such as OB/GYN) for nine years after graduating in return for financial  
12  
13  
14 323 assistance for their studies.<sup>29</sup> As the program is relatively new, it remains unclear as to whether the  
15  
16  
17 324 increase in quotas will lead to reductions in the geographic disparity of physicians.

18  
19  
20 325         There are several limitations in this research. First, the adjustment coefficients may  
21  
22 326 continue to change in the future. However, the coefficients did not fluctuate considerably during the  
23  
24 327 study period. In addition, it may be difficult to generalize our adjustment coefficients to other  
25  
26 328 countries as they were calculated using Japanese health expenditure. Nevertheless, the adjustment  
27  
28 329 method itself may have applications in other countries. Second, there was a lack of information on  
29  
30 330 the physicians' working conditions, such as whether a physician worked full-time or part-time. It  
31  
32 331 may be beneficial for future studies to incorporate mean physician working hours. Third, our  
33  
34 332 analysis had focused on specialties with a large number of physicians and previously reported  
35  
36 333 geographic disparities. This may have introduced selection bias as other specialties may not have  
37  
38 334 experienced the same geographic disparities described in this study. Finally, there may be other ways  
39  
40 335 to divide the SMAs for the subgroup analysis. However, our subgroup analysis was based on the  
41  
42 336 categorization used in a previous study,<sup>19</sup> and provided an intuitive understanding of the differences  
43  
44 337 in group characteristics.  
45  
46  
47  
48  
49  
50  
51  
52  
53  
54  
55  
56  
57  
58  
59  
60

1  
2  
3  
4  
5  
6 338  
7

8  
9 339 **Conclusion**

10  
11 340 Between 2000 and 2014, the number of physicians per 100 000 demand-adjusted population in Japan  
12  
13  
14 341 decreased in all specialties assessed except pediatrics and anesthesiology. There is also a growing  
15  
16  
17 342 urban-rural disparity in physician supply in all specialties assessed except pediatrics. In  
18  
19  
20 343 consideration of the rapidly aging population and the resulting changes in population structure,  
21  
22  
23 344 additional measures may be needed to resolve these issues and improve physician distribution in  
24  
25  
26 345 Japan.

27  
28 346  
29  
30

31 347 **List of abbreviations**

32  
33  
34 348 DAP, demand-adjusted population  
35  
36  
37 349 OB/GYN, obstetrics and gynecology  
38  
39  
40 350 MHLW, Ministry of Health, Labour and Welfare  
41  
42  
43 351 SMA, secondary medical area

44  
45 352  
46  
47

48 353 **Footnotes**

49  
50  
51 354 **Acknowledgements**

52  
53  
54 355 Not applicable.  
55  
56  
57  
58  
59  
60

1  
2  
3  
4  
5  
6 356  
7

8  
9 357 **Competing interests**

10  
11 358 The authors declare that they have no competing interests.  
12  
13

14 359  
15

16  
17 360 **Funding**

18  
19  
20 361 This work was supported in part by a Health Sciences Research Grant from the Ministry of Health,  
21

22 362 Labour and Welfare of Japan (Grant number: H27-iryō-ippān-001), a Grant-in-Aid for Scientific  
23

24 363 Research from the Japan Society for the Promotion of Science (Grant number: [A]16H02634), and  
25

26 364 RISTEX, Japan Science and Technology Agency.  
27  
28

29 365  
30  
31

32  
33  
34 366 **Contributors**

35  
36  
37 367 KH contributed to the study conception and design, data collection, analysis, interpretation, and  
38

39 368 drafting of the manuscript. SK and NS contributed to the data collection and data management. YI  
40

41 369 contributed to the study design, data acquisition, and interpretation. All authors critically revised the  
42

43 370 manuscript, and approved the final version.  
44  
45

46 371  
47  
48

49  
50  
51 372 **Ethics approval**

52  
53 373 Ethics committee approval was waived for this study because all of the data are publicly available  
54  
55  
56  
57  
58  
59  
60

1  
2  
3  
4  
5  
6 374 online and comprise only aggregate values without any personally identifiable information.  
7  
8

9 375  
10

11 376 **Role of the funding source**  
12  
13

14 377 The funder of the study had no role in study design; collection, analysis, and interpretation of the  
15  
16

17 378 data; writing of the report; or the decision to submit the paper for publication. The corresponding  
18  
19

20 379 author had full access to all the data in the study and had final responsibility for the decision to  
21  
22

23 380 submit for publication.  
24  
25

26 381  
27

28 382 **Data sharing statement**  
29  
30

31 383 No additional data available.  
32  
33

34 384  
35  
36

37 385 **Consent for publication**  
38  
39

40 386 Not applicable.  
41  
42

43 387  
44

45 388 1. Isabel C, Paula V. Geographic distribution of physicians in Portugal. *European Journal of Health*  
46  
47

48 389 *Economics* 2010;11(4):383-93. doi: 10.1007/s10198-009-0208-8  
49  
50

51 390 2. Kanchanachitra C, Lindelow M, Johnston T, et al. Human resources for health in southeast Asia:  
52  
53

54 391 shortages, distributional challenges, and international trade in health services. *Lancet*  
55  
56  
57  
58  
59  
60

- 1  
2  
3  
4  
5  
6 392 2011;377(9767):769-81. doi: 10.1016/s0140-6736(10)62035-1 [published Online First:  
7  
8  
9 393 2011/01/29]
- 10  
11 394 3. Ricketts TC. The migration of physicians and the local supply of practitioners: a five-year comparison.  
12  
13  
14 395 *Acad Med* 2013;88(12):1913-8. doi: 10.1097/acm.0000000000000012 [published Online First:  
15  
16  
17 396 2013/10/17]
- 18  
19  
20 397 4. Pitblado JR, and Raymond W. Pong. Geographic distribution of physicians in Canada. Sudbury,  
21  
22  
23 398 Ontario, Canada: Centre for Rural and Northern Health Research, Laurentian University 1999.
- 24  
25 399 5. Kobayashi Y, Takaki H. Geographic distribution of physicians in Japan. *Lancet* 1992;340(8832):1391-3.  
26  
27  
28 400 [published Online First: 1992/12/05]
- 29  
30  
31 401 6. Tanihara S, Kobayashi Y, Une H, et al. Urbanization and physician maldistribution: a longitudinal study  
32  
33  
34 402 in Japan. *BMC Health Serv Res* 2011;11:260. doi: 10.1186/1472-6963-11-260 [published Online  
35  
36  
37 403 First: 2011/10/11]
- 38  
39  
40 404 7. National Institute of Population and Social Security Research. population projection for  
41  
42  
43 405 Japan:2011-2060 2012 [Available from:  
44  
45 406 <http://www.ipss.go.jp/syoushika/tohkei/newest04/gh2401.pdf> accessed 29 Feb 2016.
- 46  
47  
48 407 8. Asano N, Kobayashi Y, Kano K. Issues of intervention aimed at preventing prospective surplus of  
49  
50  
51 408 physicians in Japan. *Med Educ* 2001;35(5):488-94. [published Online First: 2001/05/01]
- 52  
53  
54 409 9. Matsumoto M, Inoue K, Bowman R, et al. Self-employment, specialty choice, and geographical  
55  
56  
57  
58  
59  
60



- 1  
2  
3  
4  
5  
6 410 distribution of physicians in Japan: A comparison with the United States. *Health Policy*  
7  
8  
9 411 2010;96(3):239-44. doi: 10.1016/j.healthpol.2010.02.008 [published Online First: 2010/03/13]  
10  
11 412 10. Rosenthal MB, Zaslavsky A, Newhouse JP. The geographic distribution of physicians revisited.  
12  
13  
14 413 *Health Serv Res* 2005;40(6 Pt 1):1931-52. doi: 10.1111/j.1475-6773.2005.00440.x [published  
15  
16  
17 414 Online First: 2005/12/13]  
18  
19  
20 415 11. Schwartz WB, Newhouse JP, Bennett BW, et al. The changing geographic distribution of  
21  
22  
23 416 board-certified physicians. *N Engl J Med* 1980;303(18):1032-8. doi:  
24  
25  
26 417 10.1056/nejm198010303031803 [published Online First: 1980/10/30]  
27  
28  
29 418 12. Study group on the supply and demand of physicians of the Ministry of Health, Labour and Welfare.  
30  
31  
32 419 The study group report on the supply and demand of physicians 2006 [Available from:  
33  
34 420 <http://www.mhlw.go.jp/shingi/2006/07/dl/s0728-9c.pdf> accessed 16 Apr 2017].  
35  
36  
37 421 13. Hara K, Otsubo T, Kunisawa S, et al. Examining sufficiency and equity in the geographic distribution  
38  
39  
40 422 of physicians in Japan: a longitudinal study. *BMJ Open* 2017;7(3):e013922. doi:  
41  
42 423 10.1136/bmjopen-2016-013922 [published Online First: 2017/03/16]  
43  
44  
45 424 14. Sakai R, Tamura H, Goto R, et al. Evaluating the effect of Japan's 2004 postgraduate training  
46  
47  
48 425 programme on the spatial distribution of physicians. *Hum Resour Health* 2015;13:5. doi:  
49  
50  
51 426 10.1186/1478-4491-13-5 [published Online First: 2015/01/27]  
52  
53  
54 427 15. Gravelle H, Sutton M. Inequality in the geographical distribution of general practitioners in England  
55  
56  
57  
58  
59  
60

- 1  
2  
3  
4  
5  
6 428 and Wales 1974-1995. *J Health Serv Res Policy* 2001;6(1):6-13. [published Online First:  
7  
8 429 2001/02/24]
- 10  
11 430 16. Anand S, Fan VY, Zhang J, et al. China's human resources for health: quantity, quality, and  
12  
13  
14 431 distribution. *Lancet* 2008;372(9651):1774-81. doi: 10.1016/s0140-6736(08)61363-x [published  
15  
16  
17 432 Online First: 2008/10/22]
- 18  
19  
20 433 17. Mauguen A, Begg CB. Using the Lorenz Curve to Characterize Risk Predictiveness and Etiologic  
21  
22  
23 434 Heterogeneity. *Epidemiology* 2016;27(4):531-7. doi: 10.1097/ede.0000000000000499 [published  
24  
25  
26 435 Online First: 2016/04/21]
- 27  
28  
29 436 18. Theodorakis PN, Mantzavinis GD, Rrumbullaku L, et al. Measuring health inequalities in Albania: a  
30  
31  
32 437 focus on the distribution of general practitioners. *Hum Resour Health* 2006;4:5. doi:  
33  
34 438 10.1186/1478-4491-4-5 [published Online First: 2006/03/01]
- 35  
36  
37 439 19. Sasaki H, Otsubo T, Imanaka Y. Widening disparity in the geographic distribution of pediatricians in  
38  
39  
40 440 Japan. *Hum Resour Health* 2013;11:59. doi: 10.1186/1478-4491-11-59 [published Online First:  
41  
42 441 2013/11/26]
- 43  
44  
45 442 20. Kephart G, Asada Y. Need-based resource allocation: different need indicators, different results? *BMC*  
46  
47  
48 443 *Health Serv Res* 2009;9:122. doi: 10.1186/1472-6963-9-122 [published Online First:  
49  
50  
51 444 2009/07/23]
- 52  
53  
54 445 21. Hanazaki K, Tominaga R, Nio M, et al. Report from the Committee for Improving the Work  
55  
56  
57  
58  
59  
60

- 1  
2  
3  
4  
5  
6 446 Environment of Japanese Surgeons: survey on effects of the fee revision for medical services  
7  
8  
9 447 provided by surgeons. *Surg Today* 2013;43(11):1209-18. doi: 10.1007/s00595-013-0691-5  
10  
11 448 [published Online First: 2013/09/06]  
12  
13  
14 449 22. Fukuda Y, Harada T. Gender differences in specialty preference and mismatch with real needs in  
15  
16  
17 450 Japanese medical students. *BMC Med Educ* 2010;10:15. doi: 10.1186/1472-6920-10-15  
18  
19  
20 451 [published Online First: 2010/02/13]  
21  
22  
23 452 23. Jefferson L, Bloor K, Maynard A. Women in medicine: historical perspectives and recent trends. *Br*  
24  
25  
26 453 *Med Bull* 2015;114(1):5-15. doi: 10.1093/bmb/ldv007 [published Online First: 2015/03/11]  
27  
28  
29 454 24. Tabayashi K, Sai S, Iguchi A, et al. Responding to lack of anesthesiologists thinking about the current  
30  
31  
32 455 situation of anesthesiologists shortage from the standpoint of surgeons [in Japanese]. *Journal of*  
33  
34 456 *Japanese Association for Operating Room Technology* 2006;27(4):288-91.  
35  
36  
37 457 25. National Institute of Population and Social Security Research in Japan. Population Projections for  
38  
39  
40 458 Japan (April 2017) 2017 [cited 2017 Apr 14].  
41  
42  
43 459 26. Koike S, Matsumoto S, Kodama T, et al. Specialty choice and physicians' career paths in Japan: an  
44  
45  
46 460 analysis of National Physician Survey data from 1996 to 2006. *Health Policy*  
47  
48 461 2010;98(2-3):236-44. doi: 10.1016/j.healthpol.2010.06.021 [published Online First: 2010/07/29]  
49  
50  
51 462 27. Ministry of Health, Labour and Welfare. A history of post-graduate clinical training system [in  
52  
53  
54 463 Japanese] [Available from: <http://www.mhlw.go.jp/topics/bukyoku/isei/rinsyo/hensen/> accessed

1  
2  
3  
4  
5  
6 464 1 Sep. 2017].

7  
8 465 28. Toyabe S. Trend in geographic distribution of physicians in Japan. *Int J Equity Health* 2009;8:5. doi:

9  
10  
11 466 10.1186/1475-9276-8-5 [published Online First: 2009/03/05]

12  
13  
14 467 29. Matsumoto M, Takeuchi K, Tanaka J, et al. Follow-up study of the regional quota system of Japanese

15  
16  
17 468 medical schools and prefecture scholarship programmes: a study protocol. *BMJ Open*

18  
19  
20 469 2016;6(4):e011165. doi: 10.1136/bmjopen-2016-011165 [published Online First: 2016/04/17]

21  
22  
23 470

24  
25 471 **Figure titles**

26  
27  
28 472 **Figure 1** Temporal increases in physician numbers from 2000 to 2014 for the four groups of

29  
30  
31 473 secondary medical areas

32  
33  
34 474 **Appendix Figure** Adjustment coefficients of healthcare demand by age strata and sex

35  
36  
37 475

38  
39  
40 476 **Figure legends**

41  
42  
43 477 **Figure 1**

44  
45 478 Group 1 (G1): urban areas with higher initial physician supply; Group 2 (G2): rural areas with higher

46  
47  
48 479 initial physician supply; Group 3 (G3): rural areas with lower initial physician supply; Group 4 (G4):

49  
50  
51 480 urban areas with lower initial physician supply. \* As the number of births was not adjusted for

52  
53  
54 481 healthcare demand, the numbers of OB/GYN specialists per 100 000 demand-adjusted births are not

1  
2  
3  
4  
5  
6  
7  
8  
9  
10  
11  
12  
13  
14  
15  
16  
17  
18  
19  
20  
21  
22  
23  
24  
25  
26  
27  
28  
29  
30  
31  
32  
33  
34  
35  
36  
37  
38  
39  
40  
41  
42  
43  
44  
45  
46  
47  
48  
49  
50  
51  
52  
53  
54  
55  
56  
57  
58  
59  
60

482 shown. OB/GYN: obstetrics/gynecology.

483

484 **Appendix Figure**

485 Ref.: reference value, which is the mean health expenditure per capita of all patients.

For peer review only

**Table 1 Population sizes in 2000 and 2014 before and after adjustment for healthcare demand**

| Year                   | Before adjustment |                   |                                     |                                 | After adjustment   |                    |                                     |
|------------------------|-------------------|-------------------|-------------------------------------|---------------------------------|--------------------|--------------------|-------------------------------------|
|                        | Total population  | Female population | Pediatric population * <sup>1</sup> | Number of births * <sup>2</sup> | Total population   | Female population  | Pediatric population * <sup>1</sup> |
| 2000                   | 126 071 305       | 55 196 259        | 18 553 275                          | 1 190 164                       | 101 697 295        | 48 349 047         | 8 546 612                           |
| 2014                   | 126 434 634       | 56 670 449        | 16 489 385                          | 1 003 474                       | 125 837 379        | 60 902 189         | 7 594 643                           |
| Increase in number (%) | 363 329 (0.3%)    | 1 474 190 (2.7%)  | -2 063 890 (-11.1%)                 | -186 690(-15.7%)                | 24 140 085 (23.7%) | 12 553 142 (26.0%) | -951 969 (-11.1%)                   |

Healthcare demand was adjusted by multiplying the raw population with adjustment coefficients that were calculated using health expenditure per capita stratified by age and sex.

\*<sup>1</sup> Pediatric population: all residents aged below 15 years.

\*<sup>2</sup> The number of births was not adjusted for healthcare demand.

**Table 2 Overall numbers of physicians and numbers of physicians per 100 000 population in 2000 and 2014**

| Year                                                               | Specialty      |                |                |               |                    |                                |                         |             |
|--------------------------------------------------------------------|----------------|----------------|----------------|---------------|--------------------|--------------------------------|-------------------------|-------------|
|                                                                    | All physicians | Internists     | Surgeons       | Orthopedists  | OB/GYN specialists | Pediatricians                  | Anesthesiologists       |             |
| <b>Overall number of physicians</b>                                |                |                |                |               |                    |                                |                         |             |
| 2000                                                               | 243 201        | 95 545         | 25 424         | 19 225        | 12 420             | 14 156                         | 5 751                   |             |
| 2014                                                               | 296 845        | 110 097        | 23 223         | 23 297        | 12 888             | 16 758                         | 8 625                   |             |
| Increase in number (%)                                             | 53 644 (22.1%) | 14 552 (15.2%) | -2 201 (-8.7%) | 4 072 (21.2%) | 468 (3.8%)         | 2 602 (18.4%)                  | 2 874 (50.0%)           |             |
| <b>Number of physicians per 100 000 population</b>                 |                |                |                |               |                    |                                |                         |             |
| Population type                                                    | Total          | Total          | Total          | Total         | Female             | Number of births <sup>*1</sup> | Pediatric <sup>*2</sup> | Total       |
| 2000                                                               | 192.9          | 75.8           | 20.2           | 15.2          | 22.5               | 1 043.6                        | 76.3                    | 4.6         |
| 2014                                                               | 234.8          | 87.1           | 18.4           | 18.4          | 22.7               | 1 284.3                        | 101.6                   | 6.8         |
| Increase in number (%)                                             | 41.9 (21.7%)   | 11.3 (14.9%)   | -1.8 (-8.9%)   | 3.2 (21.1%)   | 0.2 (0.9%)         | 240.7 (23.1%)                  | 25.3 (33.2%)            | 2.2 (47.8%) |
| <b>Number of physicians per 100 000 demand-adjusted population</b> |                |                |                |               |                    |                                |                         |             |
| Population type                                                    | Total          | Total          | Total          | Total         | Female             | Number of births <sup>*1</sup> | Pediatric <sup>*2</sup> | Total       |
| 2000                                                               | 239.1          | 94.0           | 25.0           | 18.9          | 25.7               | N/A                            | 165.6                   | 5.7         |
| 2014                                                               | 235.9          | 87.5           | 18.5           | 18.5          | 21.2               | N/A                            | 220.7                   | 6.9         |
| Increase in number (%)                                             | -3.2 (-1.3%)   | -6.5 (-6.9%)   | -6.5 (-26.0%)  | -0.4 (-2.1%)  | -4.5 (-17.5%)      | N/A                            | 55.1 (33.3%)            | 1.2 (21.1%) |

<sup>\*1</sup> As the number of births was not adjusted for healthcare demand, the numbers of OB/GYN specialists per 100 000 demand-adjusted births are not shown.

<sup>\*2</sup> Pediatric population: all residents aged below 15 years.

OB/GYN: obstetrics/gynecology

**Table 3 Trends in Gini coefficients for the number of physicians per 100 000 population in secondary medical areas by clinical specialty**

| Year                                                        | 2000  | 2002  | 2004  | 2006  | 2008  | 2010  | 2012  | 2014  | 2000-2014<br>changes |
|-------------------------------------------------------------|-------|-------|-------|-------|-------|-------|-------|-------|----------------------|
| Number of physicians per 100 000 population                 |       |       |       |       |       |       |       |       |                      |
| All physicians                                              | 0.195 | 0.193 | 0.194 | 0.194 | 0.199 | 0.202 | 0.205 | 0.206 | 0.011                |
| Internists                                                  | 0.183 | 0.179 | 0.177 | 0.175 | 0.177 | 0.179 | 0.183 | 0.181 | -0.002               |
| Surgeons                                                    | 0.204 | 0.202 | 0.197 | 0.190 | 0.194 | 0.206 | 0.210 | 0.209 | 0.005                |
| Orthopedists                                                | 0.202 | 0.201 | 0.196 | 0.191 | 0.195 | 0.193 | 0.192 | 0.196 | -0.006               |
| OB/GYN specialists (per<br>female population)               | 0.226 | 0.218 | 0.226 | 0.240 | 0.260 | 0.263 | 0.266 | 0.270 | 0.043                |
| OB/GYN specialists (per<br>number of births) *              | 0.231 | 0.220 | 0.227 | 0.225 | 0.243 | 0.243 | 0.248 | 0.250 | 0.019                |
| Pediatricians (per<br>pediatric population)                 | 0.248 | 0.244 | 0.239 | 0.243 | 0.246 | 0.244 | 0.247 | 0.246 | -0.003               |
| Anesthesiologists                                           | 0.445 | 0.435 | 0.438 | 0.433 | 0.434 | 0.428 | 0.432 | 0.429 | -0.016               |
| Number of physicians per 100 000 demand-adjusted population |       |       |       |       |       |       |       |       |                      |
| All physicians                                              | 0.212 | 0.210 | 0.214 | 0.219 | 0.227 | 0.231 | 0.234 | 0.237 | 0.025                |
| Internists                                                  | 0.186 | 0.182 | 0.185 | 0.184 | 0.191 | 0.194 | 0.199 | 0.199 | 0.013                |
| Surgeons                                                    | 0.204 | 0.202 | 0.198 | 0.189 | 0.199 | 0.213 | 0.218 | 0.219 | 0.015                |
| Orthopedists                                                | 0.215 | 0.212 | 0.208 | 0.204 | 0.211 | 0.211 | 0.210 | 0.213 | -0.002               |
| OB/GYN specialists (per<br>female population)               | 0.254 | 0.247 | 0.255 | 0.272 | 0.292 | 0.296 | 0.299 | 0.303 | 0.049                |
| Pediatricians (per<br>pediatric population)                 | 0.244 | 0.240 | 0.235 | 0.240 | 0.243 | 0.240 | 0.243 | 0.242 | -0.002               |
| Anesthesiologists                                           | 0.456 | 0.447 | 0.451 | 0.448 | 0.449 | 0.445 | 0.450 | 0.447 | -0.009               |

\* As the number of births was not adjusted for healthcare demand, the numbers of OB/GYN specialists per 100 000 demand-adjusted births are not shown.

OB/GYN: obstetrics/gynecology



**Table 4 Descriptive statistics of the number of physicians per 100 000 population in the four groups of secondary medical areas in 2000 and 2014**

|                                                            | Before adjustment |                | After adjustment |               |
|------------------------------------------------------------|-------------------|----------------|------------------|---------------|
|                                                            | 2000              | 2014           | 2000             | 2014          |
| Total number of physicians per 100 000 population          |                   |                |                  |               |
| Group 1                                                    | 247.0             | 297.9 (20.6%)  | 311.6            | 305.7 (-1.9%) |
| Group 2                                                    | 194.8             | 226.6 (16.3%)  | 213.9            | 203.3 (-5.0%) |
| Group 3                                                    | 124.6             | 142.1 (14.0%)  | 138.9            | 127.0 (-8.6%) |
| Group 4                                                    | 126.3             | 163.1 (29.1%)  | 166.9            | 171.9 (3.0%)  |
| Number of internists per 100 000 population                |                   |                |                  |               |
| Group 1                                                    | 95.2              | 108.0 (13.4%)  | 120.1            | 110.8 (-7.7%) |
| Group 2                                                    | 79.8              | 87.5 (9.6%)    | 87.6             | 78.5 (-10.4%) |
| Group 3                                                    | 54.0              | 59.1 (9.4%)    | 60.2             | 52.8 (-12.3%) |
| Group 4                                                    | 49.6              | 61.4 (23.8%)   | 65.5             | 64.7 (-1.2%)  |
| Number of surgeons per 100 000 population                  |                   |                |                  |               |
| Group 1                                                    | 25.2              | 22.6 (-10.3%)  | 31.8             | 23.2 (-27.0%) |
| Group 2                                                    | 21.8              | 19.3 (-11.5%)  | 24.0             | 17.3 (-27.9%) |
| Group 3                                                    | 15.3              | 13.3 (-13.1%)  | 17.1             | 11.9 (-30.4%) |
| Group 4                                                    | 12.9              | 12.7 (-1.6%)   | 17.0             | 13.3 (-21.8%) |
| Number of orthopedists per 100 000 population              |                   |                |                  |               |
| Group 1                                                    | 18.6              | 22.4 (20.4%)   | 23.5             | 23.0 (-2.1%)  |
| Group 2                                                    | 16.6              | 19.2 (15.7%)   | 18.2             | 17.2 (-5.5%)  |
| Group 3                                                    | 10.8              | 12.6 (16.7%)   | 12.0             | 11.2 (-6.7%)  |
| Group 4                                                    | 10.7              | 13.4 (25.2%)   | 14.2             | 14.2 (0.0%)   |
| Number of OB/GYN specialists per 100 000 female population |                   |                |                  |               |
| Group 1                                                    | 28.4              | 28.9 (1.8%)    | 33.2             | 27.5 (-17.2%) |
| Group 2                                                    | 20.2              | 19.3 (-4.5%)   | 20.3             | 15.8 (-22.2%) |
| Group 3                                                    | 13.9              | 12.4 (-10.8%)  | 14.1             | 10.2 (-27.7%) |
| Group 4                                                    | 16.3              | 17.0 (4.3%)    | 20.0             | 16.7 (-16.5%) |
| Number of OB/GYN specialists per 100 000 births *          |                   |                |                  |               |
| Group 1                                                    | 1316.5            | 1578.9 (19.9%) | N/A              | N/A           |
| Group 2                                                    | 1051.3            | 1240.3 (18.0%) | N/A              | N/A           |
| Group 3                                                    | 714.9             | 849.8 (18.9%)  | N/A              | N/A           |
| Group 4                                                    | 702.1             | 914.7 (30.3%)  | N/A              | N/A           |
| Number of pediatricians per 100 000 pediatric population   |                   |                |                  |               |

|                                                    |      |              |       |               |
|----------------------------------------------------|------|--------------|-------|---------------|
| Group 1                                            | 49.0 | 63.1 (28.8%) | 211.5 | 272.3 (28.7%) |
| Group 2                                            | 35.5 | 50.2 (41.4%) | 158.0 | 221.0 (39.9%) |
| Group 3                                            | 22.6 | 32.7 (44.7%) | 100.7 | 144.8 (43.8%) |
| Group 4                                            | 27.3 | 36.7 (34.4%) | 117.6 | 159.4 (35.5%) |
| Number of anesthesiologists per 100 000 population |      |              |       |               |
| Group 1                                            | 6.6  | 9.4 (42.4%)  | 8.3   | 9.7 (16.9%)   |
| Group 2                                            | 4.4  | 6.1 (38.6%)  | 4.8   | 5.5 (14.6%)   |
| Group 3                                            | 1.9  | 2.8 (47.4%)  | 2.1   | 2.5 (19.0%)   |
| Group 4                                            | 2.2  | 4.1 (86.4%)  | 2.9   | 4.3 (48.3%)   |

Group 1: urban areas with higher initial physician supply; Group 2: rural areas with higher initial physician supply; Group 3: rural areas with lower initial physician supply; Group 4: urban areas with lower initial physician supply.

\* As the number of births was not adjusted for healthcare demand, the numbers of OB/GYN specialists per 100 000 demand-adjusted births are not shown.

N/A: not applicable; OB/GYN: obstetrics/gynecology

The parenthesis represents the percentage of increase/decrease between 2000 and 2014.

Figure 1



Group 1 (G1): urban areas with higher initial physician supply; Group 2 (G2): rural areas with higher initial physician supply; Group 3 (G3): rural areas with lower initial physician supply; Group 4 (G4): urban areas with lower initial physician supply. \* As the number of births was not adjusted for healthcare demand, the numbers of OB/GYN specialists per 100 000 demand-adjusted births are not shown. OB/GYN: obstetrics/gynecology

297x420mm (300 x 300 DPI)

**Appendix table. Descriptive statistics of the four groups of secondary medical areas in 2000**

| Urban / Rural<br>Group     | Urban                |                      | Rural                |                      |
|----------------------------|----------------------|----------------------|----------------------|----------------------|
|                            | Group 1              | Group 4              | Group 2              | Group 3              |
|                            | Mean(SD)             | Mean(SD)             | Mean(SD)             | Mean(SD)             |
| Number of physicians       |                      |                      |                      |                      |
| Total physicians           | 1 536.0(1 409.7)     | 619.2(433.5)         | 352.0(295.3)         | 175.5(127.2)         |
| Internists                 | 592.0(566.4)         | 242.9(165.3)         | 144.3(105.2)         | 76.1(52.0)           |
| Surgeons                   | 156.5(142.1)         | 63.1(42.2)           | 39.5(28.4)           | 21.6(14.2)           |
| Orthopedists               | 115.8(94.4)          | 52.6(36.4)           | 30.0(25.9)           | 15.2(12.2)           |
| OB/GYN specialists         | 78.1(71.8)           | 34.1(26.3)           | 16.4(15.6)           | 8.6(6.5)             |
| Pediatricians              | 88.0(71.9)           | 40.3(31)             | 19.1(19.8)           | 9.6(7.8)             |
| Anesthesiologists          | 40.9(40.1)           | 10.9(9.8)            | 7.9(9.8)             | 2.7(3.2)             |
| Raw population             |                      |                      |                      |                      |
| Total population           | 621 865.5(458 098.5) | 490 244.5(341 301.8) | 180 718.5(125 140.5) | 140 925.7(100 156.8) |
| Female population          | 274 615.3(203 154.4) | 209 062.4(144 107.6) | 81 044.7(54 965.4)   | 62 047.6(43 331.9)   |
| Pediatric population       | 89 778.6(62 866.3)   | 73 620.8(48 171.0)   | 26 837.6(19 441.3)   | 21 202.8(15 429.6)   |
| Number of births *         | 41 599.4(29 459.0)   | 34 246.1(22 935.5)   | 12 070.9(8 837.2)    | 9 497.2(6 971.3)     |
| Demand-adjusted population |                      |                      |                      |                      |
| Total population           | 492 971.0(349 667.3) | 370 991.2(242 817.0) | 164 585.9(103 001.3) | 126 410.8(84 059.2)  |
| Female population          | 235 594.4(166 553.3) | 170 624.5(109 441.9) | 80 861.9(49 177.2)   | 61 184.3(39 965.6)   |
| Pediatric population       | 41 599.4(29 459.0)   | 34 246.1(22 935.5)   | 12 070.9(8 837.2)    | 9 497.2(6 971.3)     |

1  
2  
3  
4  
5  
6  
7  
8  
9  
10  
11  
12  
13  
14  
15  
16  
17  
18  
19  
20  
21  
22  
23  
24  
25  
26  
27  
28  
29  
30  
31  
32  
33  
34  
35  
36  
37  
38  
39  
40  
41  
42  
43  
44  
45  
46

|                                           |                  |                  |              |              |
|-------------------------------------------|------------------|------------------|--------------|--------------|
| Area (km <sup>2</sup> )                   | 311.5(221.5)     | 242.8(141.4)     | 360.9(238.5) | 458.6(485.8) |
| Population density (per km <sup>2</sup> ) | 3 023.7(3 403.4) | 2 591.6(2 510.6) | 514.5(140.9) | 393.5(186.9) |

Group 1 and Group 2: Higher initial physician supply, Group 3 and Group 4: Lower initial physician supply.

\* The number of births was not adjusted for healthcare demand.

OB/GYN: obstetrics/gynecology; SD: standard deviation

For peer review only

Appendix Figure.

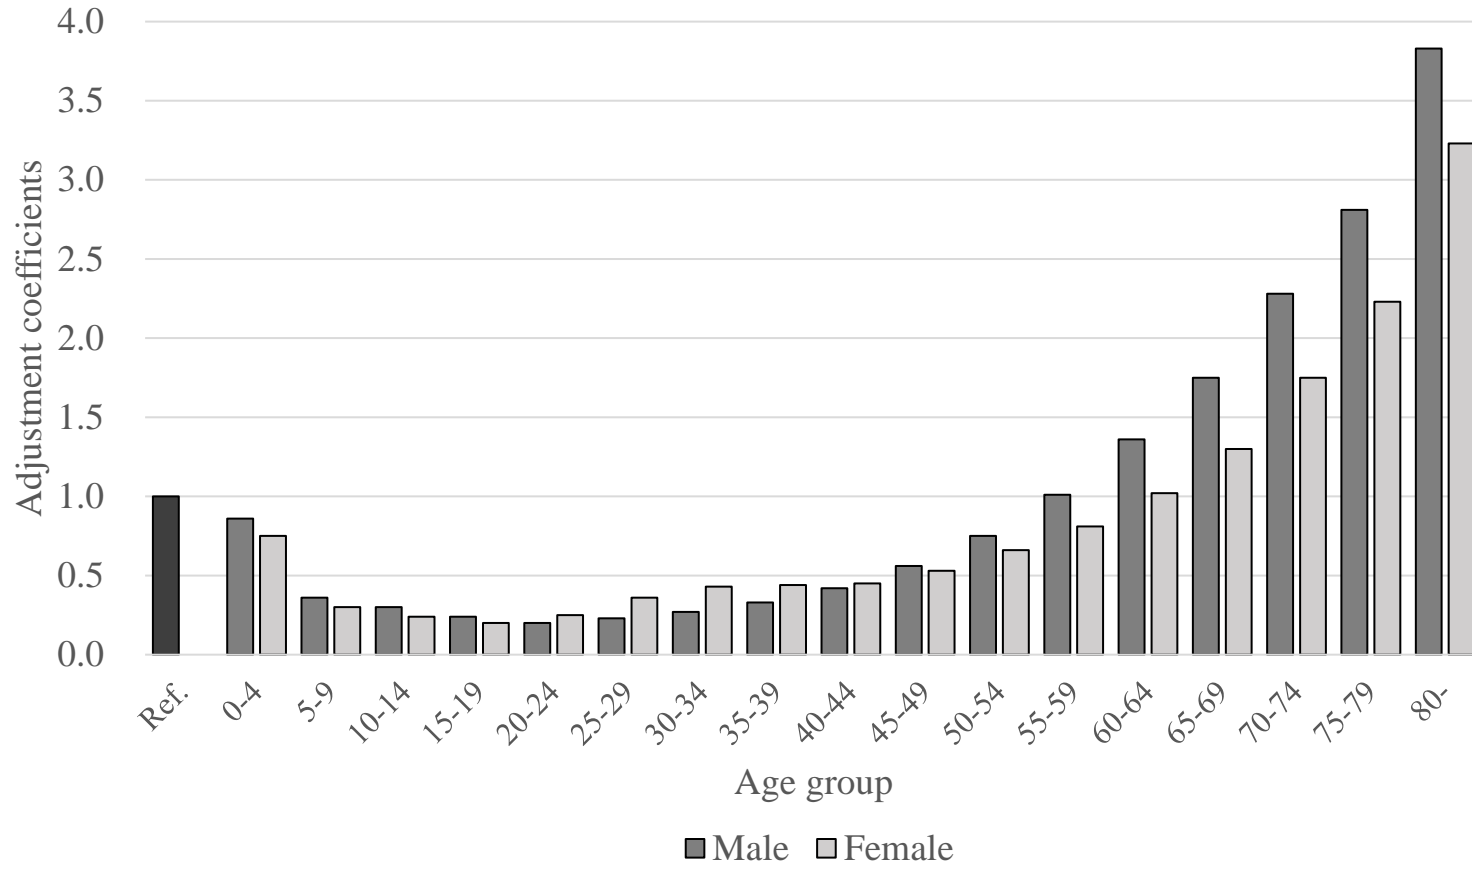

## STROBE Statement—checklist of items that should be included in reports of observational studies

|                              | Item No | Recommendation                                                                                                                                                                                                                                                                                                                                                                                                                                                                                                                                                                                                                                                                                          |
|------------------------------|---------|---------------------------------------------------------------------------------------------------------------------------------------------------------------------------------------------------------------------------------------------------------------------------------------------------------------------------------------------------------------------------------------------------------------------------------------------------------------------------------------------------------------------------------------------------------------------------------------------------------------------------------------------------------------------------------------------------------|
| <b>Title and abstract</b>    | 1       | (a) Indicate the study's design with a commonly used term in the title or the abstract -p3<br>(b) Provide in the abstract an informative and balanced summary of what was done and what was found – p3-4                                                                                                                                                                                                                                                                                                                                                                                                                                                                                                |
| <b>Introduction</b>          |         |                                                                                                                                                                                                                                                                                                                                                                                                                                                                                                                                                                                                                                                                                                         |
| Background/rationale         | 2       | Explain the scientific background and rationale for the investigation being reported -p6-7                                                                                                                                                                                                                                                                                                                                                                                                                                                                                                                                                                                                              |
| Objectives                   | 3       | State specific objectives, including any prespecified hypotheses – p7                                                                                                                                                                                                                                                                                                                                                                                                                                                                                                                                                                                                                                   |
| <b>Methods</b>               |         |                                                                                                                                                                                                                                                                                                                                                                                                                                                                                                                                                                                                                                                                                                         |
| Study design                 | 4       | Present key elements of study design early in the paper – p10-12                                                                                                                                                                                                                                                                                                                                                                                                                                                                                                                                                                                                                                        |
| Setting                      | 5       | Describe the setting, locations, and relevant dates, including periods of recruitment, exposure, follow-up, and data collection –p8-9                                                                                                                                                                                                                                                                                                                                                                                                                                                                                                                                                                   |
| Participants                 | 6       | (a) <i>Cohort study</i> —Give the eligibility criteria, and the sources and methods of selection of participants. Describe methods of follow-up<br><i>Case-control study</i> —Give the eligibility criteria, and the sources and methods of case ascertainment and control selection. Give the rationale for the choice of cases and controls<br><i>Cross-sectional study</i> —Give the eligibility criteria, and the sources and methods of selection of participants – p8-9<br>(b) <i>Cohort study</i> —For matched studies, give matching criteria and number of exposed and unexposed<br><i>Case-control study</i> —For matched studies, give matching criteria and the number of controls per case |
| Variables                    | 7       | Clearly define all outcomes, exposures, predictors, potential confounders, and effect modifiers. Give diagnostic criteria, if applicable – p10                                                                                                                                                                                                                                                                                                                                                                                                                                                                                                                                                          |
| Data sources/<br>measurement | 8*      | For each variable of interest, give sources of data and details of methods of assessment (measurement). Describe comparability of assessment methods if there is more than one group –p7-8                                                                                                                                                                                                                                                                                                                                                                                                                                                                                                              |
| Bias                         | 9       | Describe any efforts to address potential sources of bias –p7-8                                                                                                                                                                                                                                                                                                                                                                                                                                                                                                                                                                                                                                         |
| Study size                   | 10      | Explain how the study size was arrived at – p7-9                                                                                                                                                                                                                                                                                                                                                                                                                                                                                                                                                                                                                                                        |
| Quantitative variables       | 11      | Explain how quantitative variables were handled in the analyses. If applicable, describe which groupings were chosen and why – p11                                                                                                                                                                                                                                                                                                                                                                                                                                                                                                                                                                      |
| Statistical methods          | 12      | (a) Describe all statistical methods, including those used to control for confounding –p10-12<br>(b) Describe any methods used to examine subgroups and interactions –p11-12<br>(c) Explain how missing data were addressed –p7-8<br>(d) <i>Cohort study</i> —If applicable, explain how loss to follow-up was addressed<br><i>Case-control study</i> —If applicable, explain how matching of cases and controls was addressed<br><i>Cross-sectional study</i> —If applicable, describe analytical methods taking account of sampling strategy –not applicable<br>(e) Describe any sensitivity analyses –p20                                                                                            |

Continued on next page

**Results**

|                  |     |                                                                                                                                                                                                                                                                                                                                                                                                                                                    |
|------------------|-----|----------------------------------------------------------------------------------------------------------------------------------------------------------------------------------------------------------------------------------------------------------------------------------------------------------------------------------------------------------------------------------------------------------------------------------------------------|
| Participants     | 13* | (a) Report numbers of individuals at each stage of study—eg numbers potentially eligible, examined for eligibility, confirmed eligible, included in the study, completing follow-up, and analysed—Table 1, Table 2, and Table 4<br>(b) Give reasons for non-participation at each stage—7-8<br>(c) Consider use of a flow diagram – no use                                                                                                         |
| Descriptive data | 14* | (a) Give characteristics of study participants (eg demographic, clinical, social) and information on exposures and potential confounders—p8-9<br>(b) Indicate number of participants with missing data for each variable of interest—p7-8<br>(c) <i>Cohort study</i> —Summarise follow-up time (eg, average and total amount)                                                                                                                      |
| Outcome data     | 15* | <i>Cohort study</i> —Report numbers of outcome events or summary measures over time<br><i>Case-control study</i> —Report numbers in each exposure category, or summary measures of exposure<br><i>Cross-sectional study</i> —Report numbers of outcome events or summary measures—p12-14                                                                                                                                                           |
| Main results     | 16  | (a) Give unadjusted estimates and, if applicable, confounder-adjusted estimates and their precision (eg, 95% confidence interval). Make clear which confounders were adjusted for and why they were included –not applicable<br>(b) Report category boundaries when continuous variables were categorized—p11<br>(c) If relevant, consider translating estimates of relative risk into absolute risk for a meaningful time period – not applicable |
| Other analyses   | 17  | Report other analyses done—eg analyses of subgroups and interactions, and sensitivity analyses—p13-14                                                                                                                                                                                                                                                                                                                                              |

**Discussion**

|                  |    |                                                                                                                                                                                   |
|------------------|----|-----------------------------------------------------------------------------------------------------------------------------------------------------------------------------------|
| Key results      | 18 | Summarise key results with reference to study objectives—p14-15                                                                                                                   |
| Limitations      | 19 | Discuss limitations of the study, taking into account sources of potential bias or imprecision. Discuss both direction and magnitude of any potential bias—p20                    |
| Interpretation   | 20 | Give a cautious overall interpretation of results considering objectives, limitations, multiplicity of analyses, results from similar studies, and other relevant evidence—p15-20 |
| Generalisability | 21 | Discuss the generalisability (external validity) of the study results—p20                                                                                                         |

**Other information**

|         |    |                                                                                                                                                                      |
|---------|----|----------------------------------------------------------------------------------------------------------------------------------------------------------------------|
| Funding | 22 | Give the source of funding and the role of the funders for the present study and, if applicable, for the original study on which the present article is based—p22-23 |
|---------|----|----------------------------------------------------------------------------------------------------------------------------------------------------------------------|

\*Give information separately for cases and controls in case-control studies and, if applicable, for exposed and unexposed groups in cohort and cross-sectional studies.

**Note:** An Explanation and Elaboration article discusses each checklist item and gives methodological background and published examples of transparent reporting. The STROBE checklist is best used in conjunction with this article (freely available on the Web sites of PLoS Medicine at <http://www.plosmedicine.org/>, Annals of Internal Medicine at <http://www.annals.org/>, and Epidemiology at <http://www.epidem.com/>). Information on the STROBE Initiative is available at [www.strobe-statement.org](http://www.strobe-statement.org).
