# Supplementary material for: Examining changes in the equity of physician distribution in Japan: a specialty-specific longitudinal study
Source: PubMed Central journal article supplement — BMJ Open. 2018 Jan 8;8(1):e018538. doi: 10.1136/bmjopen-2017-018538 (PMC5781009; doi:10.1136/bmjopen-2017-018538), 2018-01-08
Supplement: bmjopen-2017-018538supp002.pdf [file bmjopen-2017-018538supp002.pdf]

**Appendix table. Descriptive statistics of the four groups of secondary medical areas in 2000**

| Urban / Rural<br>Group     | Urban                |                      | Rural                |                      |
|----------------------------|----------------------|----------------------|----------------------|----------------------|
|                            | Group 1              | Group 4              | Group 2              | Group 3              |
|                            | Mean(SD)             | Mean(SD)             | Mean(SD)             | Mean(SD)             |
| Number of physicians       |                      |                      |                      |                      |
| Total physicians           | 1 536.0(1 409.7)     | 619.2(433.5)         | 352.0(295.3)         | 175.5(127.2)         |
| Internists                 | 592.0(566.4)         | 242.9(165.3)         | 144.3(105.2)         | 76.1(52.0)           |
| Surgeons                   | 156.5(142.1)         | 63.1(42.2)           | 39.5(28.4)           | 21.6(14.2)           |
| Orthopedists               | 115.8(94.4)          | 52.6(36.4)           | 30.0(25.9)           | 15.2(12.2)           |
| OB/GYN specialists         | 78.1(71.8)           | 34.1(26.3)           | 16.4(15.6)           | 8.6(6.5)             |
| Pediatricians              | 88.0(71.9)           | 40.3(31)             | 19.1(19.8)           | 9.6(7.8)             |
| Anesthesiologists          | 40.9(40.1)           | 10.9(9.8)            | 7.9(9.8)             | 2.7(3.2)             |
| Raw population             |                      |                      |                      |                      |
| Total population           | 621 865.5(458 098.5) | 490 244.5(341 301.8) | 180 718.5(125 140.5) | 140 925.7(100 156.8) |
| Female population          | 274 615.3(203 154.4) | 209 062.4(144 107.6) | 81 044.7(54 965.4)   | 62 047.6(43 331.9)   |
| Pediatric population       | 89 778.6(62 866.3)   | 73 620.8(48 171.0)   | 26 837.6(19 441.3)   | 21 202.8(15 429.6)   |
| Number of births *         | 41 599.4(29 459.0)   | 34 246.1(22 935.5)   | 12 070.9(8 837.2)    | 9 497.2(6 971.3)     |
| Demand-adjusted population |                      |                      |                      |                      |
| Total population           | 492 971.0(349 667.3) | 370 991.2(242 817.0) | 164 585.9(103 001.3) | 126 410.8(84 059.2)  |
| Female population          | 235 594.4(166 553.3) | 170 624.5(109 441.9) | 80 861.9(49 177.2)   | 61 184.3(39 965.6)   |
| Pediatric population       | 41 599.4(29 459.0)   | 34 246.1(22 935.5)   | 12 070.9(8 837.2)    | 9 497.2(6 971.3)     |

|                                           |                  |                  |              |              |
|-------------------------------------------|------------------|------------------|--------------|--------------|
| Area (km <sup>2</sup> )                   | 311.5(221.5)     | 242.8(141.4)     | 360.9(238.5) | 458.6(485.8) |
| Population density (per km <sup>2</sup> ) | 3 023.7(3 403.4) | 2 591.6(2 510.6) | 514.5(140.9) | 393.5(186.9) |

---

Group 1 and Group 2: Higher initial physician supply, Group 3 and Group 4: Lower initial physician supply.

\* The number of births was not adjusted for healthcare demand.

OB/GYN: obstetrics/gynecology; SD: standard deviation
