# Supplementary figures and images for: Examining changes in the equity of physician distribution in Japan: a specialty-specific longitudinal study
Source: PubMed Central journal article supplement — BMJ Open. 2018 Jan 8;8(1):e018538. doi: 10.1136/bmjopen-2017-018538 (PMC5781009; doi:10.1136/bmjopen-2017-018538), 2018-01-08

Appendix Figure.

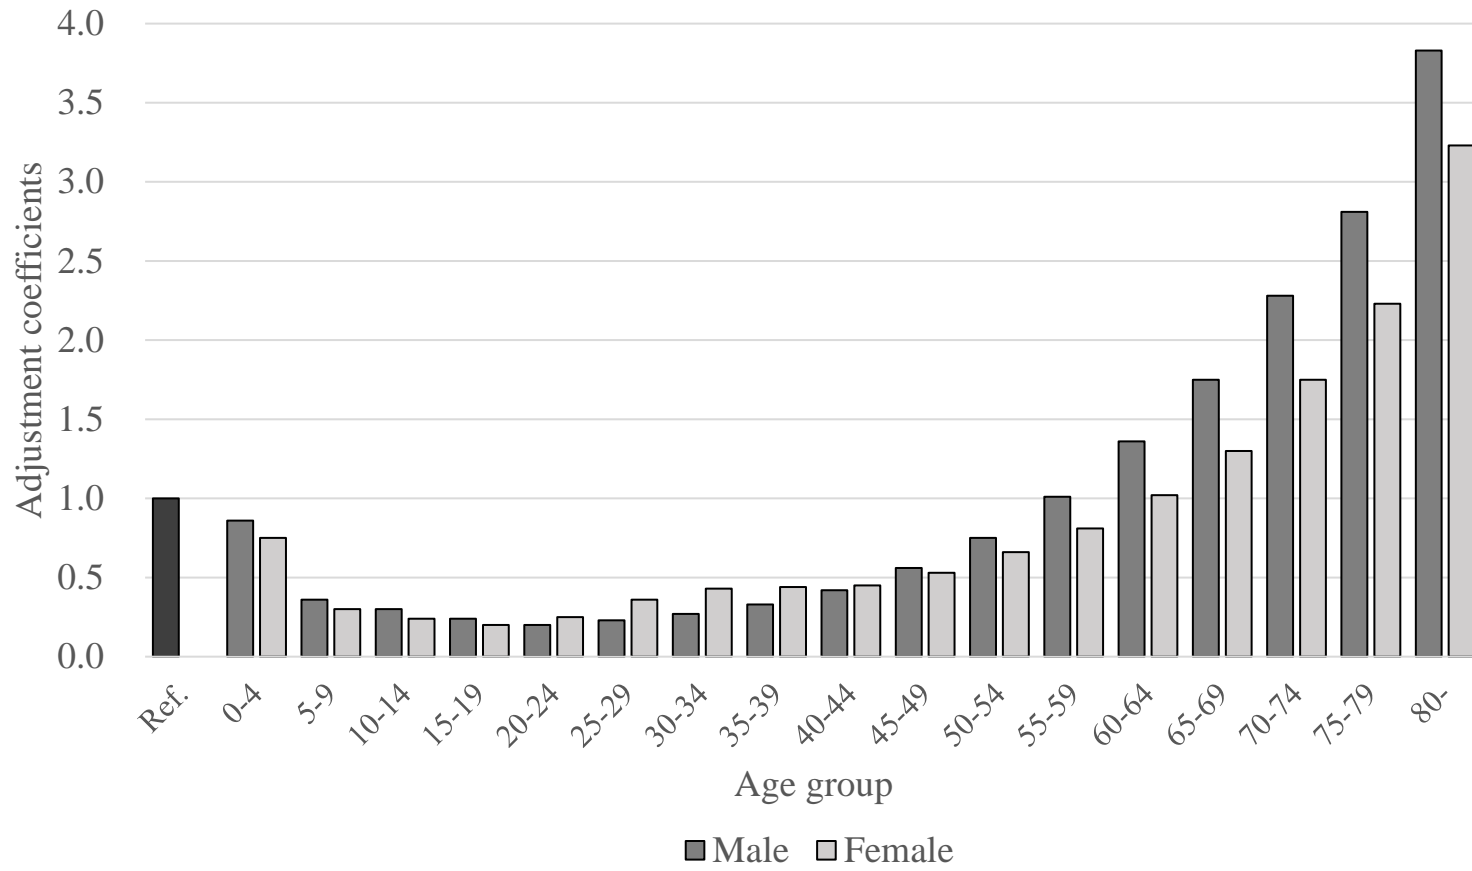

Supplement: bmjopen-2017-018538supp001.pdf [file bmjopen-2017-018538supp001.pdf]
